# An Alternative Framework for Fluorescence Correlation Spectroscopy

Sina Jazani,<sup>1,2</sup> Ioannis Sgouralis,<sup>1,2</sup> Omer M. Shafraz,<sup>3</sup> Marcia Levitus,<sup>1,4,5</sup> Sanjeevi Sivasankar,<sup>3</sup> and Steve Presse<sup>1,2,4,a</sup>

<sup>1</sup>Center for Biological Physics, Arizona State University, Tempe, AZ 85287

<sup>2</sup>Department of Physics, Arizona State University, Tempe, AZ 85287

<sup>3</sup>Department of Biomedical Engineering, University of California, Davis, CA 95616

<sup>4</sup>School of Molecular Sciences, Arizona State University, Tempe, AZ 85287

<sup>5</sup>Biodesign Institute, Arizona State University, Tempe, AZ 85287

## ABSTRACT

Fluorescence correlation spectroscopy (FCS), is a flexible and widely used tool routinely exploited for *in vivo* and *in vitro* applications. While FCS provides estimates of dynamical quantities, such as diffusion coefficients, it demands high signal to noise ratios and long time traces, typically in the minute range. In principle, the same information can be extracted from  $\mu$ -s long time traces; however, an appropriate analysis method is missing. To overcome these limitations, we adapt novel tools inspired by Bayesian non-parametrics, which starts from the direct analysis of the observed photon counts. With this approach, we are able to analyze time traces, which are too short to be analyzed by existing methods, including FCS. Our new analysis extends the capability of single molecule fluorescence confocal microscopy based approaches, to probe processes several orders of magnitude faster in time and permits a reduction of photo-toxic effects on living samples induced by long periods of light exposure.

## INTRODUCTION

Due to its flexibility and limited invasiveness for *in vivo* applications, single molecule fluorescence confocal microscopy<sup>[1-4]</sup> is one of the most widely used experimental techniques of modern Biophysics. In this technique, fluorescent molecules are allowed to freely diffuse into a volume illuminated by a tightly focused laser beam of a conventional single-focus confocal setup. Molecular motion inside the illuminated volume generates fluctuations in the emitted fluorescence that is recorded and subsequently temporally autocorrelated<sup>[1-4]</sup> or, jointly spatiotemporally autocorrelated<sup>[5,7]</sup>, to deduce physical quantities of interest. For example, fluorescence correlation spectroscopy (FCS)<sup>[1,2]</sup> as well as complementary methods – such as Fluorescence Cross-Correlation Spectroscopy (FCCS)<sup>[8]</sup>, scanning FCS<sup>[9,10]</sup>, spot variation Flu-

orescence Correlation Spectroscopy (svFCS)<sup>[11]</sup>, Fluorescence Resonance Energy Transfer-Fluorescence Correlation Spectroscopy (FCS-FRET)<sup>[12,13]</sup>, etc – estimate diffusion coefficients, reaction kinetic, binding affinities and concentrations of labeled molecules<sup>[14,15]</sup>.

While single molecule fluorescence confocal microscopy data is acquired on the micro- to millisecond timescales ( $\mu$ s-ms), fluorescence correlation methods typically require the analysis of long time traces, several seconds to tens of minutes long, depending on the molecular concentrations and emission properties of the fluorophores employed<sup>[16,17]</sup>. These traces, capturing multiple molecule traversals of the confocal volume, provide the statistics needed for the post-processing steps used in traditional FCS analysis<sup>[16]</sup> (e.g. autocorrelation, and nonlinear fitting to theoretical curves). However, processing steps like these downgrade the quality of the available data and demand either relatively high concentrations or excessively long time traces to yield reliable estimates. The same downgrades are encountered even with less traditional FCS analyses, including Bayesian approaches<sup>[18,22]</sup>, that also rely on auto-correlations.

In principle, within milliseconds, for the fluorophore concentrations and confocal volumes used in most experiments<sup>[11,21,23]</sup>, thousands of data points are already available. Accordingly, if one could, somehow, estimate diffusion coefficients within tens of ms with the same accuracy as FCS, one could hypothetically use tens of minutes worth of data to discriminate between very small differences in diffusion coefficients. Alternatively, one could opt for shorter traces in the first place and, in doing so, reduce the sample's light exposure to only a few ms, thereby minimizing photo-toxic effects which remain a severe limitation of fluorescence microscopy<sup>[24,26]</sup>.

Exploiting data on ms timescales would require a method that, simultaneously and self-consistently, estimates the number of fluorescent molecules at any given time within the (inhomogenously) illuminated volume and deduce their dynamical properties based on their photon emissions, which, in turn, depend on their evolving location within the confocal volume. The mathematics to do so in a rigorous and efficient manner have, so far, been unavailable as analyzing ms traces would demand that we consider all possible populations of molecules responsible for the observed traces, their diffusion coefficients, and every possible location (and, thus, photon emission rate) of those molecules at any given time.

Indeed, with current technology, this global optimiza-

<sup>a</sup>)Email: [spresse@asu.edu](mailto:spresse@asu.edu)

tion is prohibitively computationally expensive. To wit, maximum likelihood approaches<sup>15,27</sup>, popular in a variety of applications, are excluded since they require that the, otherwise unknown, population of molecules in the confocal volume at any given time be specified in advance by other means. These considerations motivate an entirely new framework for FCS.

Here we introduce a novel approach that exploits Bayesian non-parametrics<sup>15,28,29</sup>, a branch of Statistics first suggested<sup>30</sup> in 1973 and only broadly popularized in physical applications over the last few years<sup>15,28,29,31,37</sup>. This approach allows us to account for an arbitrary number of molecules responsible for emitting detected photons. With the proposed method, we are able to estimate physical variables, otherwise determined from FCS, with: (i) significantly shorter time traces; and (ii) nearly single molecule resolution. Furthermore, our overall framework is generalizable, and can estimate not only diffusion coefficients and molecular populations but also track molecules through time as well as determine their molecular brightness and the background photon emission rate.

## RESULTS

The method we propose for the analysis of traces from single molecule fluorescence confocal microscopy follows the Bayesian paradigm<sup>15,27,29,38</sup>. Within this paradigm, our goal is to estimate posterior probability distributions over unknown parameters such as diffusion coefficients as well as molecular populations over time.

In this section, we first demonstrate and validate our method by computing posterior distributions using synthetic (simulated) traces mimicking the properties of real<sup>148</sup> single molecule fluorescence confocal experiments. We<sup>149</sup> subsequently benchmark our estimates with traces from<sup>150</sup> control *in vitro* experiments.

### A. Demonstration and validation with simulated data

To demonstrate the robustness of our method, we simulate fluorescent time traces under a broad range of: (i) numbers of labeled molecules in the effective volume, Fig. 1; (ii) diffusion coefficients, Fig. 2a; (iii) trace lengths, Fig. 2b; and (iv) molecular brightness, Fig. 3. Since, the majority of our time traces are too short to be meaningfully analyzed with traditional FCS, we compare our posteriors directly to the ground truth that we used in the simulations.

The posteriors we obtain, in all figures, are informed from the analysis of a single trace. In those, the breadth of the posterior (i.e. variance), which is a measure of the accuracy of our estimate, therefore indicates the uncertainty introduced by the finiteness of the data and the inherent noise in this single time trace.

To begin, in Fig. 1 we simulate a 3D Gaussian confocal volume of size ( $\omega_{xy} = 0.3 \mu\text{m}$  and  $\omega_z = 1.5 \mu\text{m}$ ) and

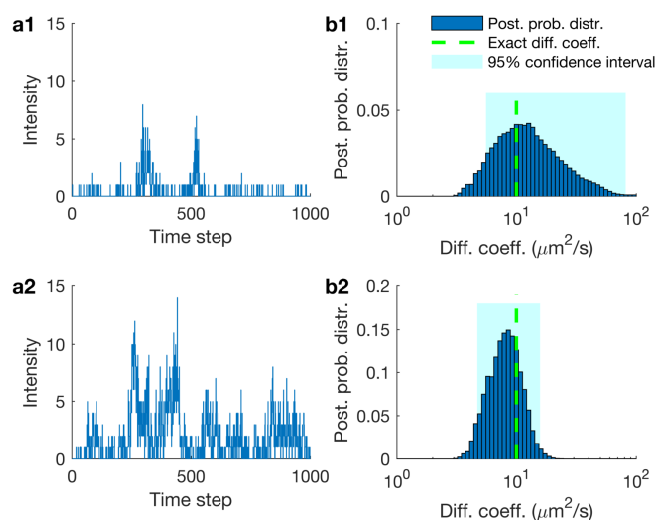

**FIG. 1. Testing the effects of the number of molecules inside the confocal volume on diffusion coefficient estimates.** (a1) Synthetic fluorescent intensity trace produced by 1 molecule inside the confocal volume. For this simulation we used a molecular brightness of  $5 \times 10^4$  photons/s and a background photon emission rate of  $10^3$  photons/s. (b1) Posterior probability distribution over the diffusion coefficient estimated from the trace in (a1). (a2) Synthetic fluorescent intensity trace produced by 5 molecules inside the confocal volume otherwise identical to (a1). (b2) Posterior probability distribution over the diffusion coefficient estimated from (a2). Traces shown in (a1) and (a2) are acquired at  $100 \mu\text{s}$  for a total of  $100 \text{ ms}$  and the highlighted regions in (b1) and (b2) represent the 95% confidence intervals. For clarity, the horizontal axis is shown in logarithmic scale.

1 molecule inside the effective volume (Fig. 1a1) or 5 molecules inside the effective volume (Fig. 1a2) diffusing at  $10 \mu\text{m}^2/\text{s}$  for a total period of  $100 \text{ ms}$ .

As can be seen in Fig. 1, a low intensity leads to a wide estimate of the diffusion coefficient. However, the higher the intensity, the sharper (i.e. more conclusive) the estimate of the diffusion coefficient becomes (e.g. note a narrower posterior in Fig. 1b2 as compared to Fig. 1b1). Thus, diffusion coefficients are determined more accurately when the number of labeled molecules are higher. Accordingly, the most difficult data to analyze are those where concentrations of molecules are so low that, on average, only one molecule ventures, albeit rarely, into the effective region of the confocal volume where it can be appreciably excited. Put differently, for an equal length time trace, the posterior estimate over the diffusion coefficient is broader (i.e. less conclusive) for lower numbers of molecules inside the effective volume, Fig. 1b1, than it is for larger numbers of molecules, Fig. 1b2.

Following a similar reasoning, the slower a molecule diffuses, the more photons are collected, leading to a sharper posterior estimate of the corresponding diffusion coefficient, Fig. 2a. Likewise, the longer the trace is, Fig. 2b, or the greater the molecular brightness is, Fig. 3, the sharper the diffusion coefficient estimate becomes.

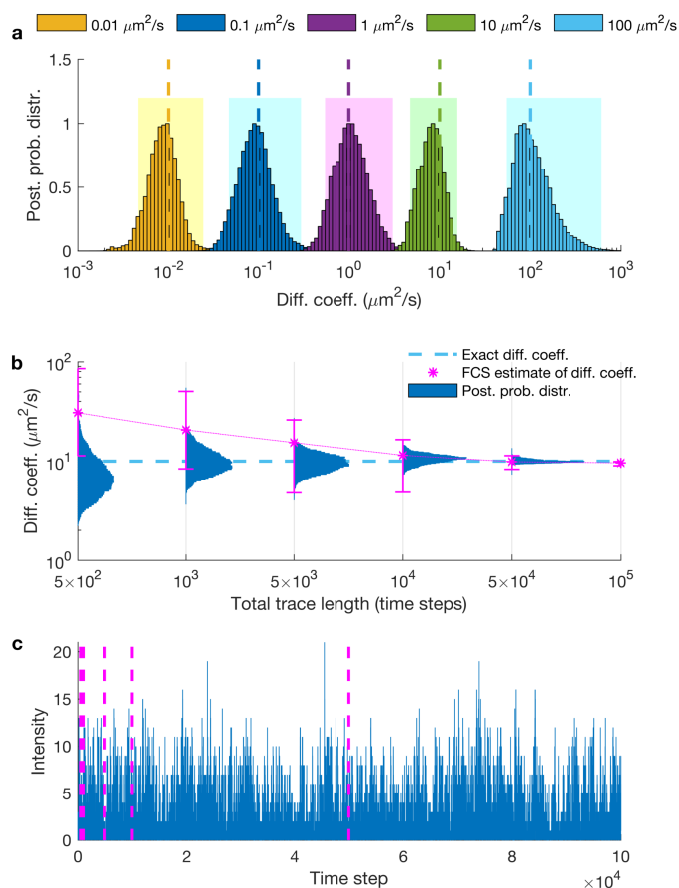

**FIG. 2. Testing the effects of diffusion coefficient and trace length on diffusion coefficient estimates.** (a) Posterior probability distributions deduced from traces produced from molecules with diffusion coefficients of 0.01, 0.1, 1, 10 and  $100 \mu\text{m}^2/\text{s}$ . For clarity, posteriors are normalized to maximum 1 and the horizontal axis is shown in logarithmic scale. Shaded regions illustrate the 95% confidence intervals. (b) Posterior probability distributions deduced from traces acquired at  $100 \mu\text{s}$  with total trace lengths of  $5 \times 10^2$ ,  $1 \times 10^3$ ,  $5 \times 10^3$ ,  $1 \times 10^4$ ,  $5 \times 10^4$  and  $1 \times 10^5$  time steps. For comparison, exact values and FCS estimates are also shown and, for clarity, the vertical axis is shown in logarithmic scale. As can be seen from (b), it is typical for FCS to require  $\approx 1000 \times$  more data than our method before estimating diffusion coefficients within  $2 \times$  of the correct value. (c) The entire trace used to deduce diffusion coefficients in (a) and (b). Each segment marked by dashed-lines represents the portion used in (b). The molecular brightness and background photon emission rates used to generate the time traces used are  $5 \times 10^4$  and  $10^3$  photons/s.

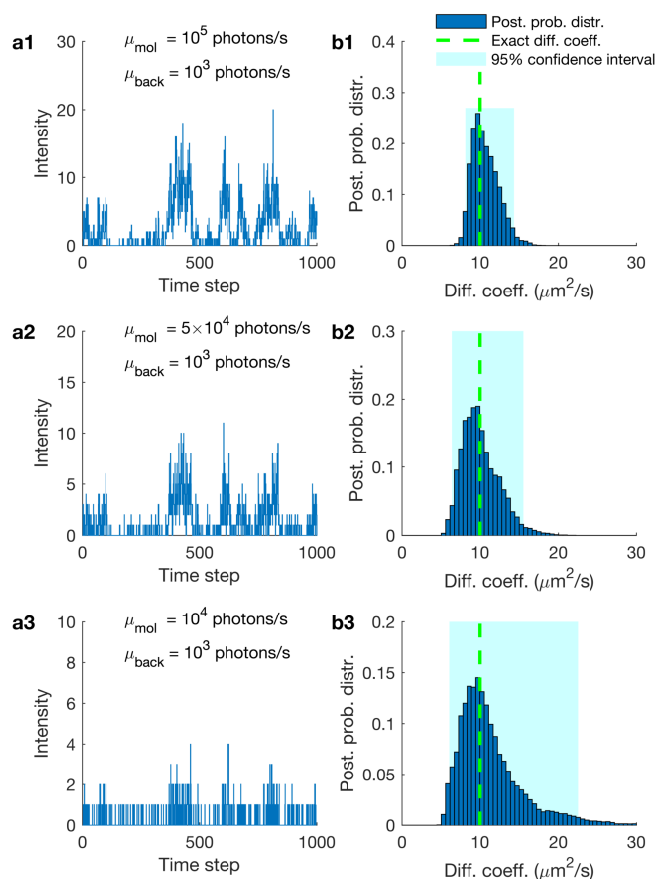

**FIG. 3. Testing the effects of molecular brightness on diffusion coefficient estimates.** (a) Intensity traces produced by the same molecular trajectories under a molecular brightness of  $10^5$ ,  $5 \times 10^4$  and  $1 \times 10^4$  photons/s and background photon emission rate fixed at  $10^3$  photons/s. (b) Posterior probability distributions and exact values of diffusion coefficients obtained from the corresponding traces. Shaded regions illustrate the 95% confidence intervals.

such as those encountered in an experiment under lower laser powers, until the molecular signature is virtually lost. As can be seen, such traces lead to broader posterior estimates over diffusion coefficients, as one would expect, since these traces are associated with greater uncertainty. Also, as such traces lead to a weaker (i.e. less constraining) likelihood, the posterior resembles more closely the prior (not shown) and naturally starts to deviate from the exact value.

## B. Benchmarking on experimental data with elongated confocal volume shapes

Here we apply our method on experimental traces captured with an elongated confocal volume that we approximate by a cylinder. To do so, we apply our method on fluorescent beads (with average diameter of 45 nm) diffusing in water. We benchmark our estimated diffusion coefficients against the Stokes-Einstein prediction

We emphasize that our definition of molecular brightness is based on the the maximum number of detected photons emitted from a single fluorophore when located at the center of the confocal volume and we provide more details in the SUPPLEMENTARY MATERIALS.

In Fig. 3 we demonstrate the robustness of the diffusion coefficient estimates when varying the molecular brightness. While we keep the background photon emission rate fixed, we simulate gradually dimmer fluorophores

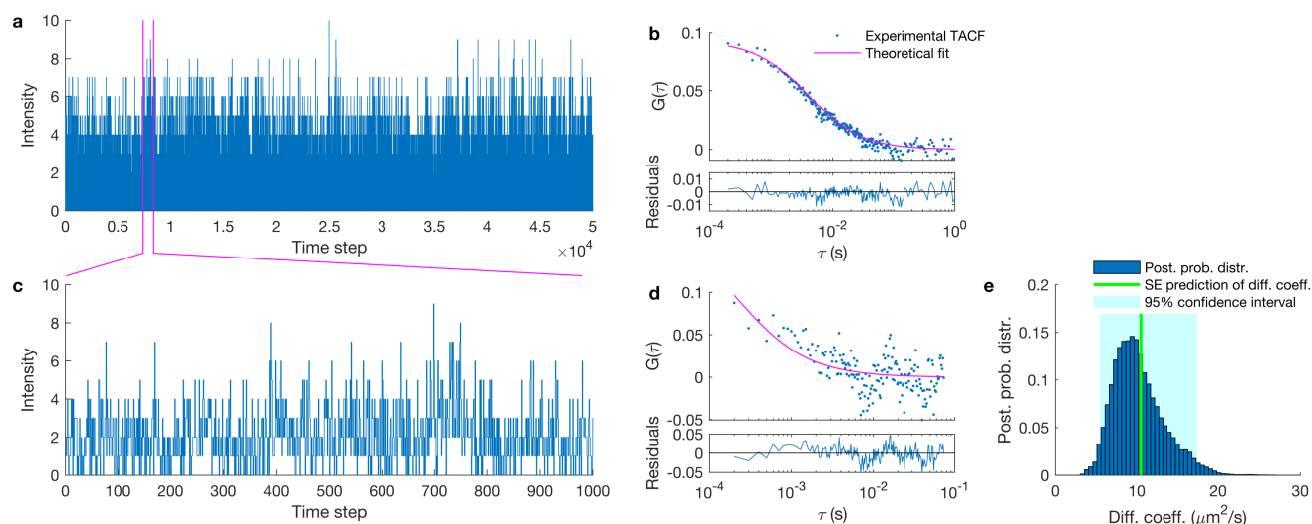

FIG. 4. **Diffusion coefficient estimates from experimental traces of free fluorescent beads using an elongated confocal volume.** (a) Experimental fluorescent intensity trace used in FCS. (b) Auto-correlation curve of the trace in (a) and best theoretical fit. (c) Portion of the trace in (a) to be used as the input to FCS and our method. (d) Auto-correlation curve of trace in (c). (e) Posterior probability distribution over diffusion coefficient estimated from the trace in (c). Stokes-Einstein prediction are denoted by a green line. Traces shown in (a) and (c) are acquired in bins of  $100 \mu\text{s}$  for a total period of 5 seconds and 0.1 second respectively. The laser power used to generate the trace (a) is  $100 \mu\text{W}$  (measured before the beam enters the objective). The estimate of diffusion coefficient resulting by autocorrelation fitting in (a) matches with the Stokes-Einstein prediction (i.e.  $10.5 \mu\text{m}^2/\text{s}$ ); while in (d) is almost ten fold higher ( $\sim 100 \mu\text{m}^2/\text{s}$ ).

199 and results from FCS. In particular, Fig 4 illustrates our 226  
 200 method's performance in the analysis of traces too short 227  
 201 to be meaningfully analyzed by FCS. Both the precise 228  
 202 FCS formulation used here as well as additional results 229  
 203 of our method on traces generated with free Cy3B dyes in 230  
 204 glycerol/water mixtures with 70% glycerol can be found 231  
 205 in the SUPPLEMENTARY MATERIALS.

### 206 C. Benchmarking on experimental data with elliptical 235 207 confocal volume shapes 236

#### 208 1. Fluorescent dyes 237

209 Next, we apply our method on experimental time 238  
 210 traces derived from single molecule fluorescence confocal 239  
 211 microscopy. In our setup, we monitor Cy3 dyes which dif- 240  
 212 fuse freely in a mixture of water and glycerol. We bench- 241  
 213 mark our estimated diffusion coefficients against two val- 242  
 214 ues: those predicted by the Stokes-Einstein formula 243  
 215 which is parametrized by physical quantities such as tem- 244  
 216 perature and viscosity; and those estimated by FCS. To 245  
 217 analyze the data using FCS, each time we used the full 246  
 218 (6 min) trace available. This is by contrast to our the 247  
 219 estimates provided by our method which are obtained on 248  
 220 traces  $\approx 1000\times$  shorter (100 ms).

221 In benchmarking, we obtained and analyzed measure- 247  
 222 ments with different: (i) numbers of Cy3 dyes inside the 248  
 223 effective volume (tuned by varying Cy3 concentrations); 249  
 224 (ii) diffusion coefficients (tuned by adjusting the viscos- 250  
 225 ity of the solution); and (iii) molecular brightness (tuned 251

by adjusting the laser power). For example, in Fig. 5b1- 232  
 233 b4, we illustrate the effect of different dye concentrations 234  
 235 where a trace with stronger signal, anticipated when con- 236  
 concentrations are higher, is expected to lead to better dif-  
 fusion coefficient estimates (and thus sharper posteriors)  
 on traces of equal length due to the higher number of  
 labeled-molecules inside the confocal volume. Consistent  
 with the synthetic data shown earlier, we obtain a broader  
 posterior over diffusion coefficients when the number of  
 dyes inside the effective volume is low and sharper posteriors  
 for higher numbers of dyes.

Just as before, the slower a molecule diffuses, the more 237  
 time it spends in the vicinity of the confocal volume, 238  
 so the more photons are collected, thereby leading to 239  
 sharper posterior estimates for the diffusion coefficient; 240  
 see Fig. 5a.

A posterior's sharpness depends strongly on the num- 241  
 ber of molecules in a time trace, their respective lo- 242  
 cations, and thus their photon emission rates. As the 243  
 molecular population near the center of the confocal vol- 244  
 ume may exhibit strong fluctuations, the width of the 245  
 posterior may also fluctuate from trace to trace, espe- 246  
 cially when the individual traces are short. Thus, the 247  
 individual posteriors become sharper only *on average* as 248  
 we move to higher numbers of molecules inside the effec- 249  
 tive volume or molecular brightness.



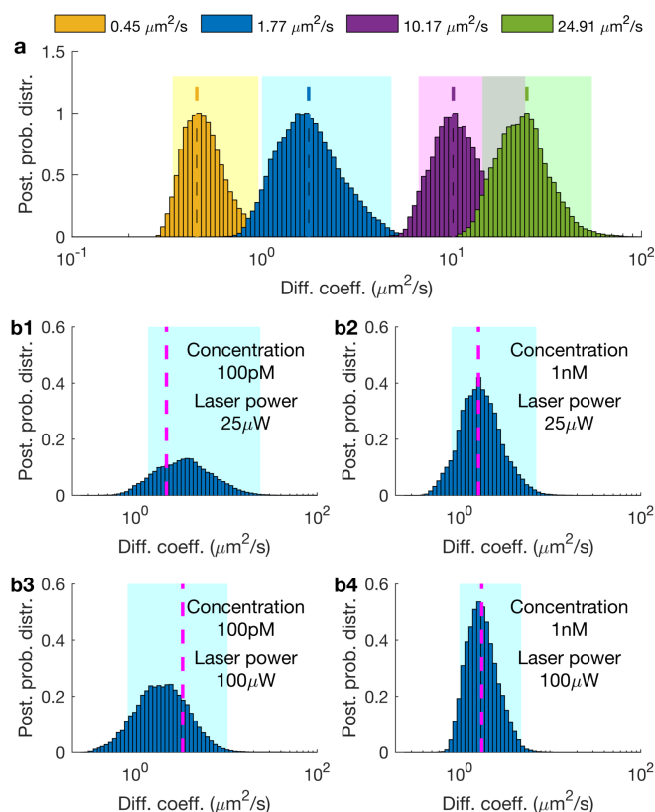

**FIG. 5. Estimating diffusion coefficients of free Cy3.** (a) Posterior probability distributions of diffusion coefficients of free Cy3 in different concentrations of glycerol/water mixture. The legend labels the posteriors according to FCS estimates of long time traces. For clarity, posteriors are normalized to maximum 1 and the horizontal axis is shown in logarithmic scale. Also, the 95% confidence intervals are shown by highlighted regions. Posteriors are obtained from the analyses of time traces acquired at 100  $\mu$ s for total periods of 100 ms. Different diffusion coefficients are obtained by varying the amount of glycerol from 99% to 50% in the glycerol/water mixture. (b) Posterior probability distributions over the diffusion coefficients of traces generated by different laser powers (25 and 100  $\mu$ W, respectively) with different concentrations of Cy3 (100 pM and 1 nM, respectively) in a glycerol/water mixture of 94% glycerol. For comparison, FCS estimates shown by dashed lines are obtained by traces, each of 6 min, i.e.  $\approx 1000\times$  longer than the segments used in our method.

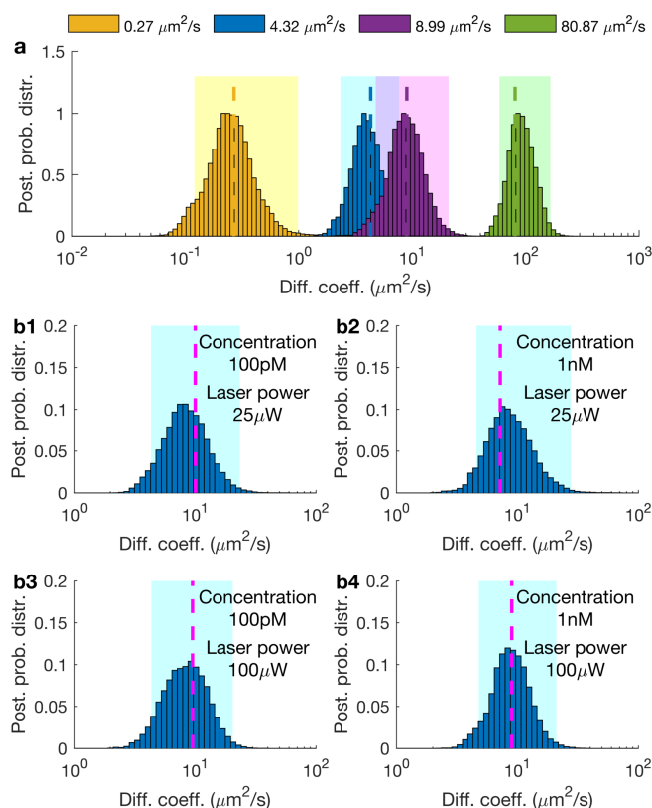

**FIG. 6. Estimating diffusion coefficients of free streptavidin.** (a) Posterior probability distributions of diffusion coefficients of free streptavidin labeled by Cy3 in different concentrations of glycerol/water mixture. The legend labels the posteriors according to FCS estimates of long time traces. For clarity, posteriors are normalized to maximum 1 and the horizontal axis is shown in logarithmic scale. Also, the 95% confidence intervals are shown by highlighted regions. Posteriors are obtained from the analyses of time traces acquired at 100  $\mu$ s for total periods of 100 ms. Different diffusion coefficients are obtained by varying the amount of glycerol from 94% to 0% in the glycerol/water mixture. (b) Posterior probability distributions over the diffusion coefficients of traces generated by different laser powers (25 and 100  $\mu$ W, respectively) with different concentrations of Cy3 (100 pM and 1 nM, respectively) in a glycerol/water mixture of 94% glycerol. For comparison, FCS estimates shown by dashed lines are obtained by traces, each of 6 min, i.e.  $\approx 1000\times$  longer than the segments used in our method.

## 2. Labeled proteins

## D. Additional results

For all cases described so far, we estimated more than just diffusion coefficients. For example, we also estimate the population of molecules contributing photons to the traces, their instantaneous photon emission rates and locations relative to the center of the confocal volume, as well as the background photon emission rate. A more detailed report of our estimates, with discussions of full joint posterior distributions, can be found in the SUPPLEMENTARY MATERIALS.

In addition to cases involving a single diffusion coefficient

252

262

253

263

254

255

256

257

258

259

260

261

272

To test our method beyond free beads and dyes, we used labeled proteins, namely freely diffusing streptavidin labeled by Cy3. Similar to the previous cases, we tested a range of concentrations, diffusion coefficients, and laser powers. Figure 6 summarizes characteristic results and compares our analyses against the results of FCS applied on longer time traces. As can be seen, our method provides acceptable estimates of the diffusion coefficient even with  $\approx 1000\times$  less datapoints than FCS.

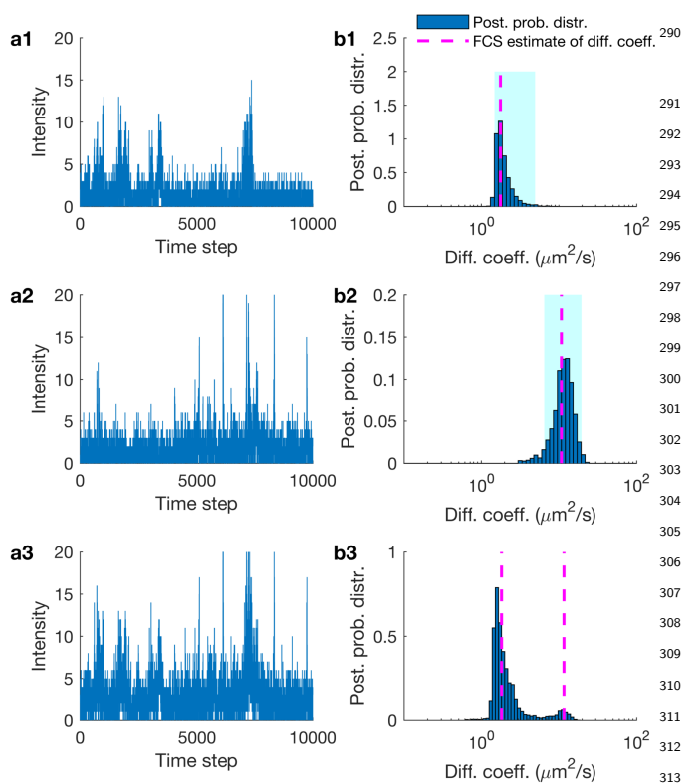

**FIG. 7. Estimating multiple diffusion coefficients in experimental Cy3 traces.** (a1)–(a2) Experimental traces of free Cy3 in glycerol/water mixtures with 94% and 75% glycerol, respectively. (a3) Trace resulting by mixing the traces in (a1) and (a2). (b1)–(b2) Posterior probability distributions resulting from the analysis of the traces in (a1) and (a2). (b3) Posterior probability distribution resulting from the analysis of the trace in (a3). For comparison, FCS estimates shown by dashed lines are produced from five different traces, each of 6 min, i.e.  $\approx 100\times$  longer than the segments shown and analyzed in our method. FCS estimates are highlighted by dashed lines. Posteriors are obtained from the analyses of time traces acquired at  $100\ \mu\text{s}$  for a total period of 1 s.

## DISCUSSION

Single molecule fluorescence confocal microscopy has the potential to reveal dynamical information at timescales that may be as short as a hundred milliseconds. Here, we have exploited Bayesian non-parametrics to overcome the limitations of specifically fluorescent correlative methods in utilizing short,  $\approx 100$  ms, and noisy time traces to deduce molecular properties such as diffusion coefficients. Exploiting novel analysis, to obtain reliable results from such short traces or excessively noisy traces as those obtained under low laser power, is key to minimizing photo-damage inherent to all methods relying on illumination and especially critical to gaining insight on rapid or light-sensitive processes<sup>24,26</sup>. The analysis of similarly short traces may also be required when monitoring non-equilibrium processes that can be resolved only within hundreds of milliseconds. Furthermore, novel analysis with increased sensitivity may reserve longer traces to tease out subtle dynamical features (such as deducing multiple diffusion coefficients at once).

The deep implication of our method is that it places single molecule fluorescence confocal microscopy at a competitive advantage over wide-field techniques used in single particle tracking. Indeed, wide-field techniques provide high, super-resolved, spatial accuracy<sup>15</sup>, but with diminished temporal resolution, since molecule localization requires the collection of sufficient photons obtained only after long frame exposures<sup>15</sup>. Such a requirement is especially problematic for photo-sensitive or rapidly diffusing biomolecules<sup>15</sup>.

By contrast to wide-field microscopy, single molecule fluorescence confocal microscopy yields minimal spatial resolution. However, as our analysis shows, although spatial resolution may be diminished, reduced photo-damage and exceptionally high temporal resolution can be achieved instead.

Since their inception, over half a century ago, correlative methods, such as FCS, have demanded very long traces in order to extract dynamical features from single molecule fluorescence confocal microscopy data<sup>211,411,441</sup>. In this study, we have developed a principled framework capable of taking advantage of all spatio-temporal information nested within time traces of photon counts and, together with novel Mathematics, we have reformulated the analysis of single molecule fluorescence confocal microscopy data.

Existing methods, even those that apply Bayesian techniques such as FCS-Bayes<sup>18,22</sup>, still utilize autocorrelation functions. Therefore, they demand equally long time traces as FCS and implicitly assume that the physical system under study is at a stationary or equilibrium phase throughout the entire trace. By contrast, our method only requires short traces and therefore it avoids stationarity or equilibrium requirements on timescales longer than those of the data analyzed. In addition, our method also: (i) provide interpretable estimation of errors (i.e. posterior variance) determined exclusively from

cient that we have considered thus far, our method can be generalized to treat multiple diffusion coefficients as well. To show this, we artificially mixed (summed) and analyzed experimental traces where dyes diffuse in different amounts of glycerol and so they exhibit different diffusion coefficients. On account of the additivity of photon emissions and detections, artificial mixing of traces allows us to obtain realistic traces of different diffusive species that can be analyzed as if they were diffusing simultaneously within the same confocal volume and separately as well. In Fig. 7, we compare the analysis of intensities created by mixing traces containing slow and fast diffusing Cy3 (94% and 75% glycerol/water, respectively). As can be seen, our estimates obtained under simultaneous diffusion compare favorably to the estimates under separate diffusion, indicating that our method can also identify robustly multiple diffusion coefficients at once.

the information content of the trace supplied (i.e. length and noise) as opposed to *ad hoc* metric fitting (i.e. chi square); (ii) track instantaneous molecule photon emissions and locations; and (iii) estimate the molecular brightness and background photon emission rates which, if left undetermined, can bias the other estimates.

Since our method is formulated exclusively in the time-domain, it offers a versatile framework for further modifications. For example, it is possible to adapt the present formulation to incorporate scanning-FCS, which involves moving the confocal volume or incorporate demanding illumination profiles, such as those arising from two photon excitation, TIRF microscopy or even Airy patterns with or without aberrations by changing the specified point spread function (see Methods section). Additionally, it is possible to extend our framework to treat multiple diffusion coefficients (see SUPPLEMENTARY MATERIALS), confining forces or photon emission kinetics as would be relevant for FCS-FRET and FLIM applications. Also, our method could be extended to handle more complex photophysics and, since we explicitly track individual molecules over time, extensions appropriate for fast bimolecular reaction kinetics are also conceivable.

## METHODS

Here we describe the formulation and mathematical foundation of our model. Our overarching goal is to start from an experimental time series of photon counts  $\bar{w} = (w_1, w_2, \dots, w_K)$  where  $w_k$  denotes the photon intensity assessed at time  $t_k$  (which includes both background photons as well as photons derived from the labeled molecules of interest), and derive estimates of kinetic quantities such as molecular locations with respect to the center of the confocal volume as well as diffusion coefficients.

To derive estimates for the desired quantities, we need to compute intermediate quantities which include: (i) molecular brightness; (ii) background photon emission rate; and, most importantly, (iii) the unknown population of moving molecules and their relative location with respect to the center of the confocal volume. Below we explain each one of these in detail. Computational details and a working implementation of the entire method are available in the SUPPLEMENTARY MATERIALS.

### E. Model description

The starting point of our analysis is the raw data, namely the photon counts. As our current focus is on deducing dynamical information on timescales exceeding  $\approx 1 \mu\text{s}$ , we ignore triplet state and photon anti-bunching effects which occur on vastly different timescales.

At the timescale of interest, individual photon detections happen stochastically and independently from each

other. Accordingly, the total number of photon counts  $w_k$  between successive assessments follows Poisson (shot noise) statistics

$$w_k \sim \text{Poisson} \left( (t_k - t_{k-1}) \left( \mu_{back} + \sum_n \mu_k^n \right) \right) \quad (1)$$

where  $\mu_{back}$  is a background photon emission rate and  $\sum_n \mu_k^n$  gathers the photon emission rates  $\mu_k^n$  from individual fluorescent molecules that we index with  $n = 1, 2, \dots$ . The total number of molecules involved in the summation above is to be determined. This is the key reason we invoke Bayesian non-parametrics in the model inference section (see below). Since we only collect a small fraction of the total photons emitted by the fluorescent molecules, in our framework  $\mu_k^n$  coincides with the emission rate of detected photons, as opposed to the true photon emission rate which might be larger.

Each rate  $\mu_k^n$  depends on the position  $(x_k^n, y_k^n, z_k^n)$  of the corresponding molecule relative to the center of the confocal volume as well as other features such as laser intensity, laser wavelength, quantum yield and camera pinhole size. Similar to other studies, we combine all these effects into a characteristic point spread function (PSF) that combines excitation and emission PSFs

$$\mu_k^n = \mu_{mol} \text{PSF}(x_k^n, y_k^n, z_k^n). \quad (2)$$

The parameter  $\mu_{mol}$  represents the molecular brightness and as we discuss in the SUPPLEMENTARY MATERIALS it is related to the maximum photon emission rate of a single molecule that is located at the center of the confocal volume. Specific choices of PSF models, such as Gaussian or Gaussian-Lorentzian, are also detailed in the SUPPLEMENTARY MATERIALS.

Finally, we associate individual molecular locations across time by adopting a motion model. Here we assume that molecules are purely diffusive and arrive at

$$\begin{aligned} x_k^n &\sim \text{Normal}(x_{k-1}^n, 2(t_k - t_{k-1})D) \\ y_k^n &\sim \text{Normal}(y_{k-1}^n, 2(t_k - t_{k-1})D) \\ z_k^n &\sim \text{Normal}(z_{k-1}^n, 2(t_k - t_{k-1})D) \end{aligned} \quad (3)$$

where  $D$  denotes the diffusion coefficient, which we assume is the same for all molecules. As we explain in the SUPPLEMENTARY MATERIALS, these probabilities result directly from the diffusion equation. Additionally, in the SUPPLEMENTARY MATERIALS, we illustrate how this motion model can be generalized to capture more than one diffusion coefficients.

A graphical summary of the entire formulation is shown on Fig. 8.

### F. Model inference

The quantities which we want to estimate, for example the diffusion coefficient  $D$ , molecular locations through

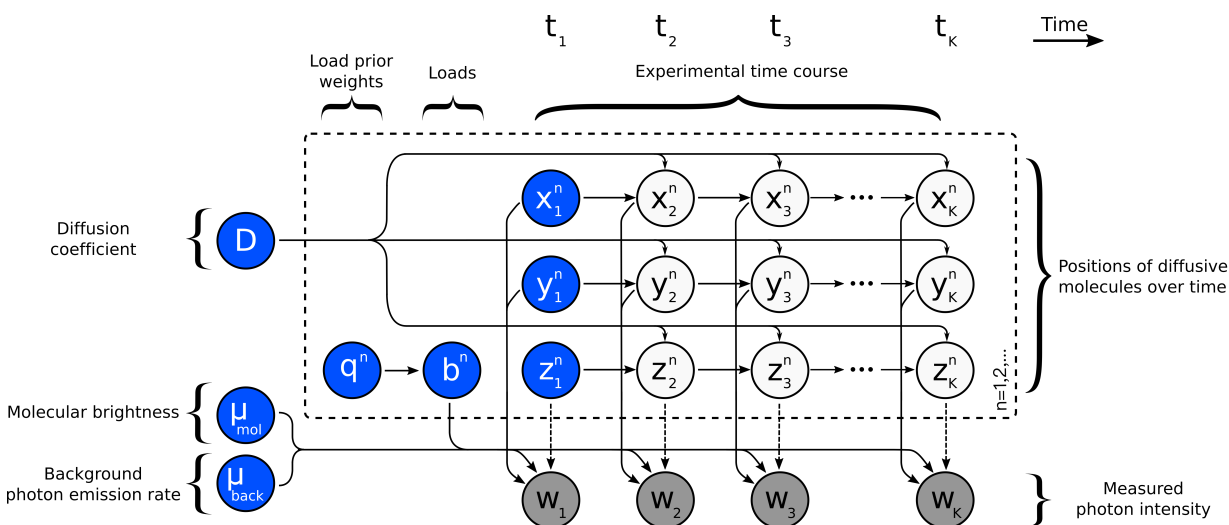

FIG. 8. **Graphical representation of the formulation used in the analysis of fluorescence time traces.** A population of model molecules, labeled by  $n = 1, 2, \dots$ , evolves over the course of the experiment which is marked by  $k = 1, 2, \dots, K$ . Here,  $x_k^n, y_k^n, z_k^n$  denote the location in Cartesian space of molecule  $n$  at time  $t_k$ ;  $\mu_{mol}$  denotes the brightness of an individual molecule; and  $\mu_{back}$  denotes the background photon emission rate. During the experiment, only a single observation  $w_k$ , combining photon emissions between  $t_{k-1}$  and  $t_k$  from every molecule and background is recorded at every time step. The diffusion coefficient  $D$  determines the evolution of the molecular locations which, in turn, influence the photon emission rates and ultimately the recorded photon intensity  $w_k$ . Auxiliary variables  $b^n$ , or “loads”, and corresponding prior weights  $q^n$ , are introduced in order to estimate the unknown population size. The dashed arrows apply for the 3D-Gaussian and 2D-Gaussian-Lorentzian PSFs; while in the case of the 2D-Gaussian-Cylindrical there is no dependency of the measurements  $w_k$  on the  $z_k^n$  coordinates of the molecules (see the SUPPLEMENTARY MATERIALS for the definitions of these PSFs).

446 time  $(x_k^n, y_k^n, z_k^n)$ , molecular brightness  $\mu_{mol}$  and back-474  
 447 ground photon emission rate  $\mu_{back}$  or the molec-475  
 448 ulation are introduced as model variables in the preceding476  
 449 formulation. To estimate values for these variables, we477  
 450 follow the Bayesian paradigm<sup>[15,28,38,60]</sup>. 478

451 Variables such as  $D$ ,  $\mu_{mol}$  and  $\mu_{back}$  are parameters of479  
 452 the model and, as such, require priors. Choices for these480  
 453 priors are straightforward and, for interpretational and481  
 454 computational convenience, we adopt the distributions482  
 455 described in the SUPPLEMENTARY MATERIALS. 483

456 Additionally, we must place priors on the initial molec-484  
 457 ular locations,  $(x_1^n, y_1^n, z_1^n)$ , i.e. the locations of the485  
 458 molecules at the onset of the measurement period. Spec-486  
 459 ifying a prior on initial molecular locations also entails487  
 460 specifying a prior on the molecular population. 488

461 In particular, to allow the dimensionality or, alterna-489  
 462 tively, the complexity of our model to fluctuate based on490  
 463 the number of molecules that contribute to the fluores-491  
 464 cent trace, we abandon traditional Bayesian parametric492  
 465 priors and turn to the non-parametric formulation de-493  
 466 scribed below. 494

467 Before we proceed any further, we recast equation (2)495  
 468 as 496

$$469 \mu_k^n = b^n \mu_{mol} \text{PSF}(x_k^n, y_k^n, z_k^n). \quad (4) \quad 497 \quad 498$$

470 The newly introduced variables  $b^n$ , one for each model499  
 471 molecule, may take only values 1 or 0. In particular, the500  
 472 possibility that  $b^n = 0$ , coinciding with the case where501  
 473 molecules do not contribute to the observation, allows502

us to introduce an arbitrarily large number of molecules, technically an infinite number. With the introduction of  $b^n$ , we can estimate the number of molecules that contribute photons (termed “active” to distinguish them from those that do not contribute termed “inactive”) simultaneously with the rest of the parameters simply by treating each  $b^n$  as a separate parameter and estimating its value (of 1 for active molecules and 0 for inactive ones).

To estimate  $b^n$ , we place a prior  $b^n \sim \text{Bernoulli}(q^n)$  and subsequently a hyperprior on  $q^n$  in order to learn precisely how many model molecules are active. For the latter, we choose  $q^n \sim \text{Beta}(A_q, B_q)$  with hyperparameters  $A_q$  and  $B_q$ . Both steps can be combined by invoking the newly developed Beta-Bernoulli process<sup>[36,61]</sup> which is described in more detail in the SUPPLEMENTARY MATERIALS.

Once the choices for the priors above are made, we form a joint posterior probability  $p(D, \mu_{mol}, \mu_{back}, \{x_k^n, y_k^n, z_k^n, b^n, q^n\}_k^n | \bar{w})$  encompassing all unknown variables which we may wish to determine.

The nonlinearities in the PSF, with respect to variables  $\{x_k^n, y_k^n, z_k^n\}_k^n$ , and the non-parametric prior on  $\{b^n, q^n\}_k^n$  exclude analytic forms for our posterior. For this reason, we develop a computational scheme exploiting Markov chain Monte Carlo<sup>[38,62]</sup> that can be used to generate pseudo-random samples from this posterior.

The main bottleneck of a naive implementation of our



503 method, as compared to correlative methods, is its higher<sup>553</sup>  
504 computational cost. As we explain in the SUPPLEMEN-<sup>554</sup>  
505 TARY MATERIALS, to have computations run on an aver-<sup>555</sup>  
506 age desktop computer, we adopt mathematical approxi-<sup>556</sup>  
507 mations (e.g. photon binning, Anscombe transform<sup>63</sup>) and<sup>557</sup>  
508 filter updates<sup>64,65</sup>) that are tested on the synthetic data<sup>558</sup>  
509 presented. <sup>559</sup>

510 A working implementation (source code and GUI) is<sup>560</sup>  
511 given in the SUPPORTING MATERIALS. <sup>561</sup>

## 512 G. Data acquisition <sup>562</sup>

### 513 1. Synthetic data <sup>563</sup>

514 We obtain the synthetic data presented in the Re-<sup>564</sup>  
515 sults section by standard pseudo-random computer simu-<sup>570</sup>  
516 lations<sup>66,68</sup> that mimic the common single molecule fluo-<sup>571</sup>  
517 rescence confocal setup. We provide details and complete<sup>572</sup>  
518 parameter choices in the SUPPLEMENTARY MATERIALS. <sup>573</sup>

### 519 2. Experimental data <sup>574</sup>

520 For the experimental data acquired with elongated  
521 confocal volumes, a stock solution of Cy3B (mono-  
522 reactive NHS ester, GE Healthcare) was prepared by  
523 dissolving a small amount of solid in 1 mL of doubly-<sup>579</sup>  
524 distilled water, and its concentration was determined  
525 from the absorbance of the solution using the extinction  
526 coefficient provided by the vendors. A 10 nM solution,  
527 was then prepared by appropriate dilution of the stock,  
528 and measured on a silicone perfusion chamber mounted<sup>582</sup>  
529 on a glass coverslip. Fluorescent beads were purchased<sup>583</sup>  
530 from ThermoFisher (Catalog number: F8792. Lot num-<sup>584</sup>  
531 ber: 1604237). The average diameter was 0.046  $\mu\text{m}$  as<sup>585</sup>  
532 indicated in the certificate of analysis provided by the<sup>586</sup>  
533 vendors. Suspensions for FCS measurements were pre-<sup>587</sup>  
534 pared by adding 3  $\mu\text{L}$  of stock solution (9.4 x 10<sup>14</sup> par-<sup>589</sup>  
535 ticles/mL) to 1 mL of water and sonicating the mixture<sup>590</sup>  
536 for 20 minutes. Measurements were carried out using a<sup>591</sup>  
537 home-built instrument. A 532 nm continuous-wave laser<sup>592</sup>  
538 (Compass 215M-10, Coherent, Santa Clara, CA) was at-<sup>594</sup>  
539 tenuated to 100  $\mu\text{W}$  and focused onto an PlanApo 100x,<sup>595</sup>  
540 1.4 NA, oil-immersion, objective (Olympus, Center Val-<sup>596</sup>  
541 ley, PA). Emitted fluorescence was collected using the<sup>597</sup>  
542 same objective and then passed through a 50  $\mu\text{m}$  pinhole<sup>599</sup>  
543 to reject the out-of-focus light. The signal was detected<sup>600</sup>  
544 using a silicon avalanche photodiode (SPCM-AQR-14;<sup>601</sup>  
545 Perkin-Elmer, Fremont, CA). A band-pass filter (Omega<sup>602</sup>  
546 3RD560-620) in front of the detector was employed to<sup>603</sup>  
547 further reduce the background signal and an ALV corre-<sup>604</sup>  
548 lator card (ALV 5000/EPP, ALV-GmbH, Langen, Ger-<sup>606</sup>  
549 many) was used to correlate the detected fluorescence<sup>607</sup>  
550 signal. Data for our analysis were acquired with 100  $\mu\text{s}$ <sup>608</sup>  
551 resolution using a PCI-6602 acquisition card (National<sup>609</sup>  
552 Instruments, Austin, TX). <sup>610</sup>

For the experimental data acquired with elliptical con-  
focal volumes, Cy3 dye and Cy3-labeled streptavidin so-  
lutions were prepared by suspending Cy3 or streptavidin  
in glycerol/buffer (pH 7.5, 10 mM Tris-HCl, 100 mM NaCl  
and 10 mM KCl, 2.5 mM CaCl<sub>2</sub>) at different v/v, to a fi-  
nal concentration of either 100 pM or 1 nM. The solutions  
were added onto a glass-bottomed fluid-cell, mounted on  
a custom designed single molecule fluorescence confocal  
microscope<sup>69,70</sup> and a 532 nm laser beam was focused  
to a diffraction-limited spot on the glass coverslip of the  
fluid-cell using a 60x, 1.42 NA, oil-immersion objective  
(Olympus). the laser power was measured before the ob-  
jective and the beam is reflected by a dichroic and focused  
by the objective on to the sample. The dichroic reflected  
95% of the intensity on to the objective. Emitted fluo-  
rescence was collected by the same objective and focused  
onto the detection face of a Single Photon Avalanche  
Diode (SPAD, Micro Photon Devices) that has a max-  
imum count rate of 11.8 Mc/s. A bandpass filter was  
placed in front of the detector to transmit only the fluo-  
rescence from Cy3 and to block the back-scattered ex-  
citation light. TTL pulses, triggered by the arrival of  
individual photons on the SPAD, were timestamped and  
recorded at 80 MHz by a field programmable gated array  
(FPGA, NI Instruments) using custom LabVIEW soft-  
ware and initially binned at 100  $\mu\text{s}$ <sup>70</sup>.

## REFERENCES

- <sup>1</sup>E. L. Elson and D. Magde, "Fluorescence correlation spectroscopy. i. conceptual basis and theory," *Biopolymers* **13**, 1–27 (1974).
- <sup>2</sup>D. Magde, E. L. Elson, and W. W. Webb, "Fluorescence correlation spectroscopy. ii. an experimental realization," *Biopolymers* **13**, 29–61 (1974).
- <sup>3</sup>G. R. Bright, G. W. Fisher, J. Rogowska, and D. L. Taylor, "Fluorescence ratio imaging microscopy," *Methods in cell biology* **30**, 157–192 (1989).
- <sup>4</sup>J. A. Fitzpatrick and B. F. Lillemeier, "Fluorescence correlation spectroscopy: linking molecular dynamics to biological function in vitro and in situ," *Current opinion in structural biology* **21**, 650–660 (2011).
- <sup>5</sup>M. A. Digman and E. Gratton, "Lessons in fluctuation correlation spectroscopy," *Annual review of physical chemistry* **62**, 645–668 (2011).
- <sup>6</sup>C. Di Rienzo, E. Gratton, F. Beltram, and F. Cardarelli, "Fast spatiotemporal correlation spectroscopy to determine protein lateral diffusion laws in live cell membranes," *Proceedings of the National Academy of Sciences* **110**, 12307–12312 (2013).
- <sup>7</sup>M. A. Digman, C. M. Brown, P. Sengupta, P. W. Wiseman, A. R. Horwitz, and E. Gratton, "Measuring fast dynamics in solutions and cells with a laser scanning microscope," *Biophysical journal* **89**, 1317–1327 (2005).
- <sup>8</sup>P. Schwille, F.-J. Meyer-Almes, and R. Rigler, "Dual-color fluorescence cross-correlation spectroscopy for multicomponent diffusional analysis in solution," *Biophysical journal* **72**, 1878–1886 (1997).
- <sup>9</sup>Z. Petrášek and P. Schwille, "Precise measurement of diffusion coefficients using scanning fluorescence correlation spectroscopy," *Biophysical Journal* **94**, 1437–1448 (2008).
- <sup>10</sup>Z. Petrášek and P. Schwille, "Scanning fluorescence correlation

- spectroscopy,” in *Single molecules and nanotechnology* (Springer, 2008) pp. 83–105.
- <sup>11</sup>V. Ruprecht, S. Wieser, D. Marguet, and G. J. Schütz, “Spot variation fluorescence correlation spectroscopy allows for super-resolution chronoscopy of confinement times in membranes,” *Bio-physical journal* **100**, 2839–2845 (2011).
- <sup>12</sup>K. Remaut, B. Lucas, K. Braeckmans, N. Sanders, S. De Smedt, and J. Demeester, “Fret-fcs as a tool to evaluate the stability of oligonucleotide drugs after intracellular delivery,” *Journal of controlled release* **103**, 259–271 (2005).
- <sup>13</sup>T. Torres and M. Levitus, “Measuring conformational dynamics: a new fcs-fret approach,” *The Journal of Physical Chemistry B* **111**, 7392–7400 (2007).
- <sup>14</sup>K. Tsekouras, A. P. Siegel, R. N. Day, and S. Pressé, “Inferring diffusion dynamics from fcs in heterogeneous nuclear environments,” *Biophysical journal* **109**, 7–17 (2015).
- <sup>15</sup>A. Lee, K. Tsekouras, C. Calderon, C. Bustamante, and S. Pressé, “Unraveling the thousand word picture: An introduction to super-resolution data analysis,” *Chemical Reviews* **117**, 7276–7330 (2017).
- <sup>16</sup>R. Rigler and E. S. Elson, *Fluorescence correlation spectroscopy: theory and applications*, Vol. 65 (Springer Science & Business Media, 2012).
- <sup>17</sup>J. Enderlein, I. Gregor, D. Patra, and J. Fitter, “Statistical analysis of diffusion coefficient determination by fluorescence correlation spectroscopy,” *Journal of fluorescence* **15**, 415–422 (2005).
- <sup>18</sup>S.-M. Guo, J. He, N. Monnier, G. Sun, T. Wohland, and M. Bathe, “Bayesian approach to the analysis of fluorescence correlation spectroscopy data ii: application to simulated and *in vitro* data,” *Analytical chemistry* **84**, 3880–3888 (2012).
- <sup>19</sup>J. He, S.-M. Guo, and M. Bathe, “Bayesian approach to the analysis of fluorescence correlation spectroscopy data i: theory,” *Analytical chemistry* **84**, 3871–3879 (2012).
- <sup>20</sup>W. Kügel, A. Muschiok, and J. Michaelis, “Bayesian-inference based fluorescence correlation spectroscopy and single-molecule burst analysis reveal the influence of dye selection on dna hairpin dynamics,” *ChemPhysChem* **13**, 1013–1022 (2012).
- <sup>21</sup>K. R. Murphy, C. A. Stedmon, P. Wenig, and R. Brody, “Openfluor—an online spectral library of auto-fluorescence by organic compounds in the environment,” *Analytical Methods* **6**, 721–722 (2014).
- <sup>22</sup>G. Sun, S.-M. Guo, C. Teh, V. Korzh, M. Bathe, and T. Wohland, “Bayesian model selection applied to the analysis of fluorescence correlation spectroscopy data of fluorescent proteins *in vitro* and *in vivo*,” *Analytical Chemistry* **87**, 4326–4333 (2015).
- <sup>23</sup>T. J. Stasevich, F. Mueller, A. Michelman-Ribeiro, T. Rosales, J. R. Knutson, and J. G. McNally, “Cross-validating frap and fcs to quantify the impact of photobleaching on *in vivo* binding estimates,” *Biophysical journal* **99**, 3093–3101 (2010).
- <sup>24</sup>Z. Liu, L. D. Lavis, and E. Betzig, “Imaging live-cell dynamics and structure at the single-molecule level,” *Molecular cell* **58**, 644–659 (2015).
- <sup>25</sup>M. Purschke, N. Rubio, K. D. Held, and R. W. Redmond, “Phototoxicity of hoechst 33342 in time-lapse fluorescence microscopy,” *Photochemical & Photobiological Sciences* **9**, 1634–1639 (2010).
- <sup>26</sup>V. Magidson and A. Khodjakov, “Circumventing photodamage in live-cell microscopy,” in *Methods in cell biology*, Vol. 114 (Elsevier, 2013) pp. 545–560.
- <sup>27</sup>U. Von Toussaint, “Bayesian inference in physics,” *Reviews of Modern Physics* **83**, 943 (2011).
- <sup>28</sup>M. Tavakoli, J. N. Taylor, C.-B. Li, T. Komatsuzaki, and S. Pressé, “Single molecule data analysis: An introduction,” in *Advances in Chemical Physics* (John Wiley & Sons, 2017) Chap. 4, pp. 205–305.
- <sup>29</sup>K. E. Hines, “A primer on bayesian inference for biophysical systems,” *Biophysical journal* **108**, 2103–2113 (2015).
- <sup>30</sup>T. S. Ferguson, “A bayesian analysis of some nonparametric problems,” *The annals of statistics*, 209–230 (1973).
- <sup>31</sup>I. Sgouralis and S. Pressé, “An introduction to infinite hmms for single-molecule data analysis,” *Biophysical Journal* **112**, 2021–2029 (2017).
- <sup>32</sup>I. Sgouralis and S. Pressé, “Icon: an adaptation of infinite hmms for time traces with drift,” *Biophysical journal* **112**, 2117–2126 (2017).
- <sup>33</sup>I. Sgouralis, M. Whitmore, L. Lapidus, M. J. Comstock, and S. Pressé, “Single molecule force spectroscopy at high data acquisition: A bayesian nonparametric analysis,” *The Journal of Chemical Physics* **148**, 123320 (2018).
- <sup>34</sup>C. P. Calderon and K. Bloom, “Inferring latent states and refining force estimates via hierarchical dirichlet process modeling in single particle tracking experiments,” *PloS one* **10**, e0137633 (2015).
- <sup>35</sup>K. E. Hines, J. R. Bankston, and R. W. Aldrich, “Analyzing single-molecule time series via nonparametric bayesian inference,” *Biophysical journal* **108**, 540–556 (2015).
- <sup>36</sup>J. Paisley and L. Carin, “Nonparametric factor analysis with beta process priors,” in *Proceedings of the 26th Annual International Conference on Machine Learning* (ACM, 2009) pp. 777–784.
- <sup>37</sup>I. Sgouralis, A. Nebenführ, and V. Maroulas, “A bayesian topological framework for the identification and reconstruction of sub-cellular motion,” *SIAM Journal on Imaging Sciences* **10**, 871–899 (2017).
- <sup>38</sup>A. Gelman, J. B. Carlin, H. S. Stern, D. B. Dunson, A. Vehtari, and D. B. Rubin, *Bayesian data analysis*, Vol. 2 (CRC press Boca Raton, FL, 2014).
- <sup>39</sup>Y. Chen, J. D. Müller, Q. Ruan, and E. Gratton, “Molecular brightness characterization of egfp *in vivo* by fluorescence fluctuation spectroscopy,” *Biophysical journal* **82**, 133–144 (2002).
- <sup>40</sup>H. C. Berg, *Random walks in biology* (Princeton University Press, 1993).
- <sup>41</sup>T. Wohland, R. Rigler, and H. Vogel, “The standard deviation in fluorescence correlation spectroscopy,” *Biophysical journal* **80**, 2987–2999 (2001).
- <sup>42</sup>K. Hassler, M. Leutenegger, P. Rigler, R. Rao, R. Rigler, M. Gösch, and T. Lasser, “Total internal reflection fluorescence correlation spectroscopy (tir-fcs) with low background and high count-rate per molecule,” *Optics Express* **13**, 7415–7423 (2005).
- <sup>43</sup>K. M. Berland, P. So, and E. Gratton, “Two-photon fluorescence correlation spectroscopy: method and application to the intracellular environment,” *Biophysical Journal* **68**, 694–701 (1995).
- <sup>44</sup>R. Rigler, Ü. Mets, J. Widengren, and P. Kask, “Fluorescence correlation spectroscopy with high count rate and low background: analysis of translational diffusion,” *European Biophysics Journal* **22**, 169–175 (1993).
- <sup>45</sup>J. Enderlein, I. Gregor, D. Patra, and J. Fitter, “Art and artefacts of fluorescence correlation spectroscopy,” *Current pharmaceutical biotechnology* **5**, 155–161 (2004).
- <sup>46</sup>T. Dertinger, V. Pacheco, I. von der Hocht, R. Hartmann, I. Gregor, and J. Enderlein, “Two-focus fluorescence correlation spectroscopy: A new tool for accurate and absolute diffusion measurements,” *ChemPhysChem* **8**, 433–443 (2007).
- <sup>47</sup>M. Born and E. Wolf, *Principles of optics: electromagnetic theory of propagation, interference and diffraction of light* (Elsevier, 2013).
- <sup>48</sup>S. F. Gibson and F. Lanni, “Experimental test of an analytical model of aberration in an oil-immersion objective lens used in three-dimensional light microscopy,” *JOSA A* **9**, 154–166 (1992).
- <sup>49</sup>M. Pirchi, R. Tsukanov, R. Khamis, T. E. Tomov, Y. Berger, D. C. Khara, H. Volkov, G. Haran, and E. Nir, “Photon-by-photon hidden markov model analysis for microsecond single-molecule fret kinetics,” *The Journal of Physical Chemistry B* **120**, 13065–13075 (2016).
- <sup>50</sup>J. E. Bronson, J. Fei, J. M. Hofman, R. L. Gonzalez Jr, and C. H. Wiggins, “Learning rates and states from biophysical time series: a bayesian approach to model selection and single-molecule fret data,” *Biophysical journal* **97**, 3196–3205 (2009).
- <sup>51</sup>E. B. van Munster and T. W. Gadella, “Fluorescence lifetime imaging microscopy (flim),” in *Microscopy techniques* (Springer, 2005) pp. 143–175.

- 752 <sup>52</sup>P. I. Bastiaens and A. Squire, “Fluorescence lifetime imaging microscopy: spatial resolution of biochemical processes in the cell,” *Trends in cell biology* **9**, 48–52 (1999).
- 753  
754  
755 <sup>53</sup>L. Song, C. Varma, J. Verhoeven, and H. J. Tanke, “Influence of the triplet excited state on the photobleaching kinetics of fluorescent molecules in microscopy,” *Biophysical journal* **70**, 2959–2968 (1996).
- 756  
757  
758 <sup>54</sup>D. Soumpasis, “Theoretical analysis of fluorescence photobleaching recovery experiments,” *Biophysical journal* **41**, 95–97 (1983).
- 759  
760 <sup>55</sup>I. Sgouralis, S. Madaan, F. Djutanta, R. Kha, R. F. Hariadi, and S. Pressé, “A bayesian nonparametric approach to single molecule Förster resonance energy transfer,” *The Journal of Physical Chemistry B* (2018).
- 761  
762  
763  
764 <sup>56</sup>J. Widengren, U. Mets, and R. Rigler, “Fluorescence correlation spectroscopy of triplet states in solution: a theoretical and experimental study,” *The Journal of Physical Chemistry* **99**, 13368–13379 (1995).
- 765  
766  
767  
768 <sup>57</sup>K. S. Grubmayer, A. Kurz, and D.-P. Herten, “Single-molecule studies on the label number distribution of fluorescent markers,” *Chemphyschem* **15**, 734–742 (2014).
- 769  
770  
771 <sup>58</sup>G. Brakenhoff, K. Visscher, and H. Van der Voort, “Size and shape of the confocal spot: control and relation to 3d imaging and image processing,” in *Handbook of biological confocal microscopy* (Springer, 1990) pp. 87–91.
- 772  
773  
774  
775 <sup>59</sup>Y. Chen, J. D. Müller, P. T. So, and E. Gratton, “The photon counting histogram in fluorescence fluctuation spectroscopy,” *Biophysical journal* **77**, 553–567 (1999).
- 776  
777  
778  
779 <sup>60</sup>S. Jazani, I. Sgouralis, and S. Pressé, “A method for single molecule tracking using a conventional single-focus confocal setup,” *The Journal of Chemical Physics* **150**, 123320 (2019).
- 780  
781  
782 <sup>61</sup>K. Tsekouras, T. C. Custer, H. Jashnsaz, N. G. Walter, and S. Pressé, “A novel method to accurately locate and count large numbers of steps by photobleaching,” *Molecular Biology of the Cell* **27**, 3601–3615 (2016).
- 783  
784  
785  
786 <sup>62</sup>C. Robert and G. Casella, *Introducing Monte Carlo Methods with R* (Springer Science & Business Media, 2009).
- 787  
788  
789 <sup>63</sup>F. J. Anscombe, “The transformation of poisson, binomial and negative-binomial data,” *Biometrika* **35**, 246–254 (1948).
- 790  
791  
792 <sup>64</sup>H. M. Menegaz, J. Y. Ishihara, G. A. Borges, and A. N. Vargas, “A systematization of the unscented kalman filter theory,” *IEEE Transactions on automatic control* **60**, 2583–2598 (2015).
- 793  
794  
795 <sup>65</sup>E. A. Wan and R. Van Der Merwe, “The unscented kalman filter for nonlinear estimation,” in *Adaptive Systems for Signal Processing, Communications, and Control Symposium 2000. AS-SPCC. The IEEE 2000* (Ieee, 2000) pp. 153–158.
- 796  
797  
798  
799  
800  
801  
802  
803  
804  
805  
806  
807  
808  
809  
810  
811  
812  
813  
814  
815  
816  
817  
818  
819  
820  
821  
822  
823  
824  
825  
826
- <sup>66</sup>O. C. Ibe, *Elements of Random Walk and Diffusion Processes* (John Wiley & Sons, 2013).
- <sup>67</sup>D. J. Higham, “An algorithmic introduction to numerical simulation of stochastic differential equations,” *SIAM review* **43**, 525–546 (2001).
- <sup>68</sup>R. Erban and S. J. Chapman, “Stochastic modelling of reaction-diffusion processes: algorithms for bimolecular reactions,” *Physical biology* **6**, 046001 (2009).
- <sup>69</sup>H. Li, C.-F. Yen, and S. Sivasankar, “Fluorescence axial localization with nanometer accuracy and precision,” *Nano letters* **12**, 3731–3735 (2012).
- <sup>70</sup>P. D. Schmidt, B. H. Reichert, J. G. Lajoie, and S. Sivasankar, “Method for high frequency tracking and sub-nm sample stabilization in single molecule fluorescence microscopy,” *Scientific reports* **8**, 13912 (2018).

## ACKNOWLEDGMENTS

SP acknowledges support from NSF CAREER grant MCB-1719537. SS acknowledge support from the National Institute of Health grant R01GM121885. ML thanks Anirban Purohit for assistance with the experiments.

## AUTHOR CONTRIBUTIONS

SJ developed analysis software and analyzed data; SJ, IS developed computational tools; OS, SS, ML contributed experimental data; SJ, IS, SP conceived research; SP oversaw all aspects of the projects. SJ and IS contributed equally to this work.

## CODE AVAILABILITY.

Source code and GUI versions of the methods developed herewith are available through the SUPPORTING MATERIALS.

1                   **An Alternative Framework for Fluorescence Correlation Spectroscopy**  
2                   **— Supplementary Material —**

3                   Sina Jazani and Ioannis Sgouralis  
4                   *Center for Biological Physics, Department of Physics*  
5                   *Arizona State University, Tempe, AZ 85287*

6                   Omer M. Shafraz and Sanjeevi Sivasankar  
7                   *Department of Biomedical Engineering, University of California, Davis, CA 95616*

8                   Marcia Levitus  
9                   *Center for Biological Physics,*  
10                  *School of Molecular Sciences and Biodesign Institute*  
11                  *Arizona State University, Tempe, AZ 85287*

12                  Steve Pressé  
13                  *Center for Biological Physics,*  
14                  *Department of Physics and School of Molecular Sciences*  
15                  *Arizona State University, Tempe, AZ 85287*

16                  Here we provide supplementary materials and technical details that complement the main text.  
17                  These include: (i) Additional analysis results that demonstrate the estimation of molecular bright-  
18                  ness and background photon emission rates, joint posterior probability distributions, molecule loca-  
19                  tions, and additional results for multiple diffusive species. These results are repeated for simulated  
20                  and experimental data. (ii) Additional details of the methods used including descriptions of the mo-  
21                  tion model, the Stokes-Einstein model, point spread functions (PSFs), and time trace preparation.  
22                  (iii) A complete description of the inference framework developed that includes choices for the prior  
23                  probability distributions and a computational implementation. (iv) A description of the modifica-  
24                  tions necessary for the model with multiple diffusive species. (v) Summary of notation and other  
25                  conventions used throughout this study as well as detailed parameter choices for the simulations  
26                  and analyses.



## Contents

27

|    |                                                                                         |    |
|----|-----------------------------------------------------------------------------------------|----|
| 28 | <b>S1. Additional results</b>                                                           | 3  |
| 29 | S1.1. Analysis of additional simulated data                                             | 3  |
| 30 | S1.2. Analysis of additional experimental data                                          | 9  |
| 31 | S1.3. Analysis of additional data for multiple diffusive species                        | 15 |
| 32 | <b>S2. Summary of point estimates</b>                                                   | 18 |
| 33 | <b>S3. Detailed methods description</b>                                                 | 19 |
| 34 | S3.1. Representation of molecular diffusive motion                                      | 19 |
| 35 | S3.2. Description of Stokes-Einstein model                                              | 19 |
| 36 | S3.3. FCS formulation                                                                   | 19 |
| 37 | S3.4. Definition of molecular brightness                                                | 20 |
| 38 | S3.5. Definition of point spread function models                                        | 20 |
| 39 | S3.6. Description of the data simulation                                                | 21 |
| 40 | S3.7. Definition of normalized distance and numbers of molecules                        | 21 |
| 41 | S3.8. Description of the time trace preparation                                         | 22 |
| 42 | <b>S4. Detailed description of the inference framework</b>                              | 24 |
| 43 | S4.1. Description of prior probability distributions                                    | 24 |
| 44 | S4.1.1. Prior on the diffusion coefficient                                              | 24 |
| 45 | S4.1.2. Priors on molecular brightness and background photon emission rates             | 24 |
| 46 | S4.1.3. Priors on initial molecule locations                                            | 25 |
| 47 | S4.1.4. Priors and hyperpriors for molecule loads                                       | 25 |
| 48 | S4.2. Summary of model equations                                                        | 26 |
| 49 | S4.3. Description of the computational scheme                                           | 26 |
| 50 | S4.3.1. Overview of the sampling updates                                                | 27 |
| 51 | S4.3.2. Sampling of active molecule trajectories                                        | 28 |
| 52 | S4.3.3. Sampling of inactive molecule trajectories                                      | 32 |
| 53 | S4.3.4. Sampling of the diffusion coefficient                                           | 32 |
| 54 | S4.3.5. Sampling of the molecule prior weights and loads                                | 32 |
| 55 | S4.3.6. Joint sampling of the molecular brightness and background photon emission rates | 33 |
| 56 | <b>S5. Extension for multiple diffusive species</b>                                     | 35 |
| 57 | <b>S6. Summary of notation, abbreviations, parameters and other options</b>             | 37 |

58

## **S1. Additional results**

59

### **S1.1. Analysis of additional simulated data**

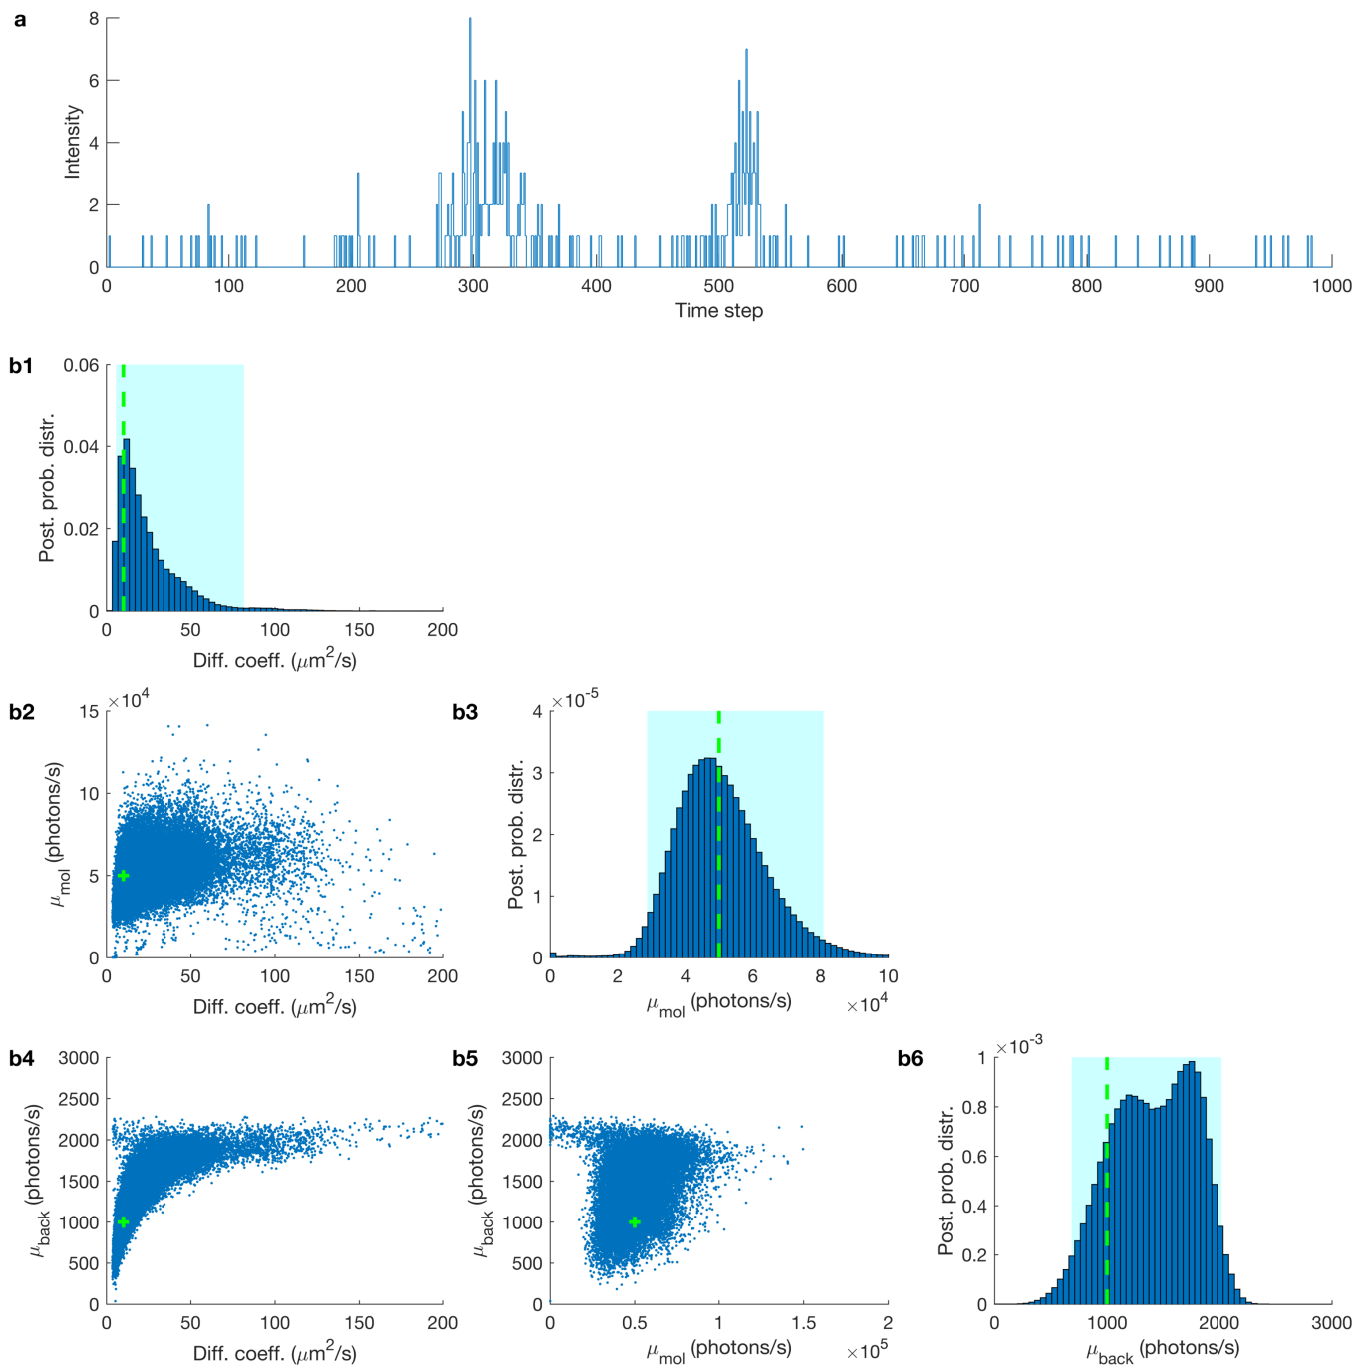

FIG. S1. **Estimated joint posterior probability distribution.** (a) Synthetic fluorescent intensity trace used in Fig. 1a1 with a length of 1000 data points and time step  $100 \mu\text{s}$ . The true values of the diffusion coefficient, molecular brightness and background emission rates are,  $10 \mu\text{m}^2/\text{s}$ ,  $5 \times 10^4$  photons/s and  $10^3$  photons/s (shown by green dashed lines). (b1) The posterior of the diffusion coefficient. (b2) The joint probability distribution of the diffusion coefficient and molecular brightness. (b3) The posterior probability distribution of the molecular brightness. (b4) The joint probability distribution of the diffusion coefficient and molecular brightness. (b5) The joint probability distribution of the molecular brightness and background photon emission rates. (b6) The posterior probability distribution of the background photon emission rate. The 95% confidence intervals are shown with pink highlighted regions.

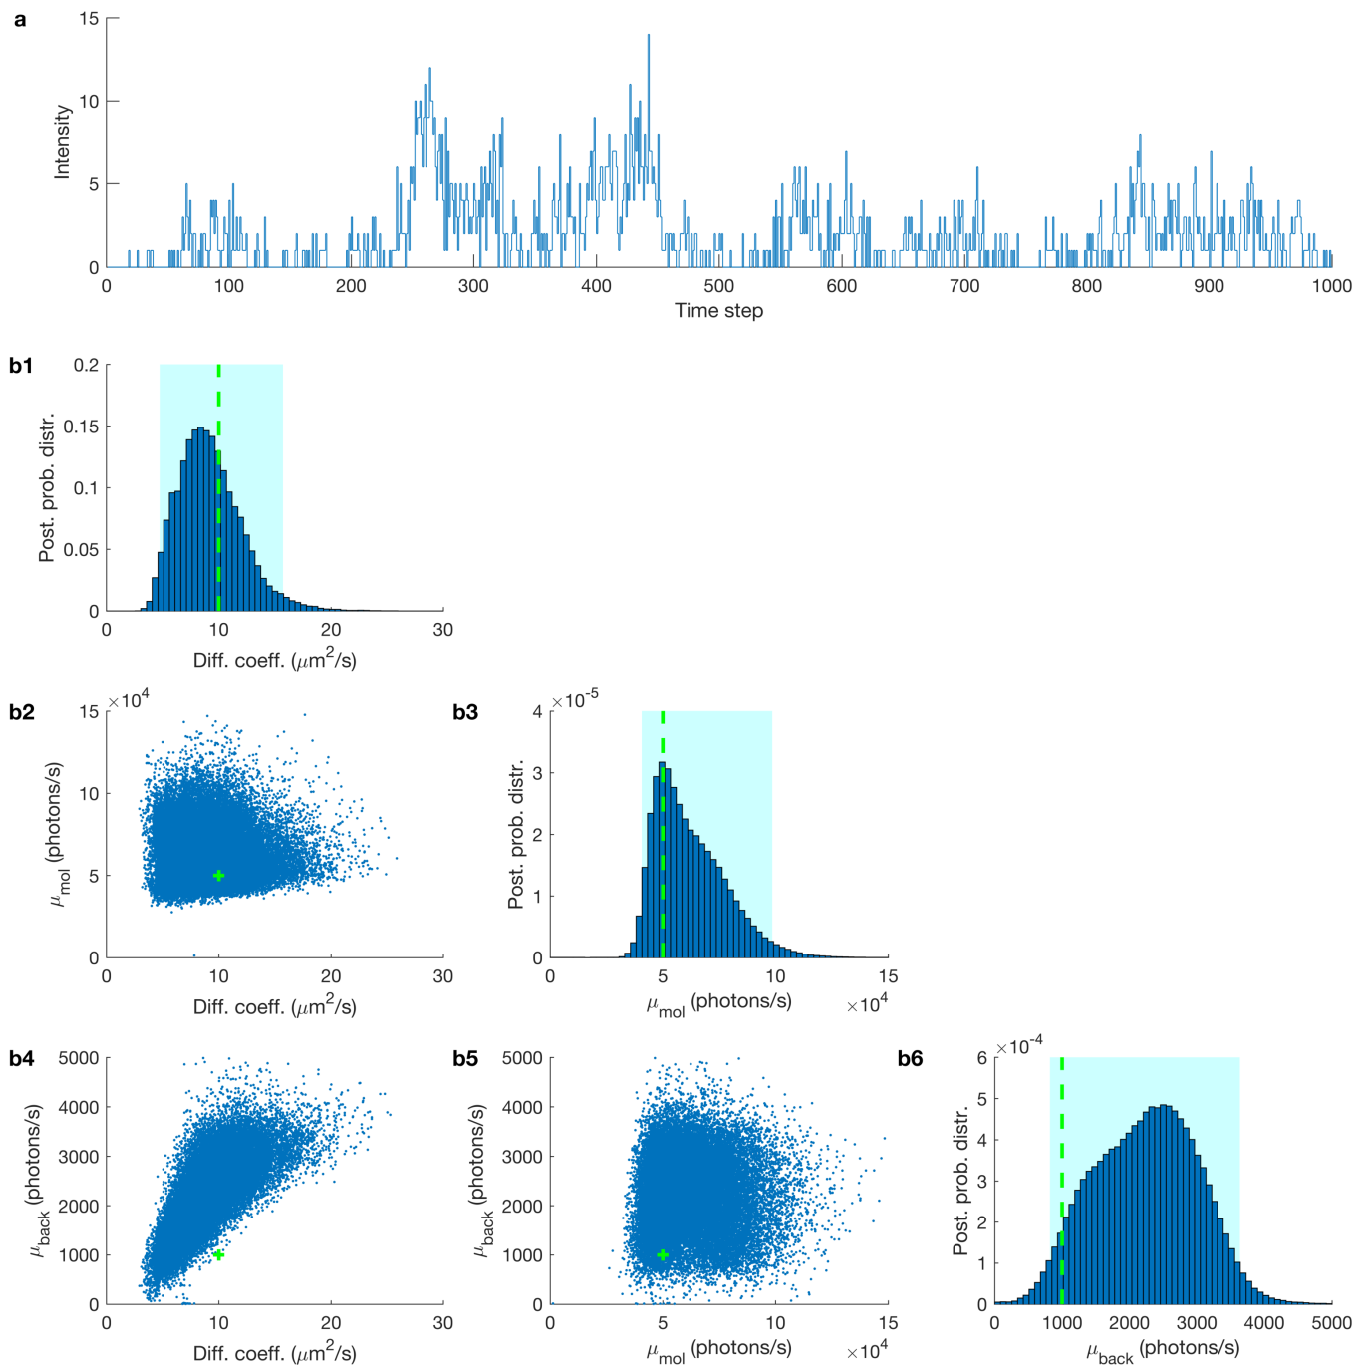

**FIG. S2. Estimated joint posterior probability distribution.** (a) Synthetic fluorescent intensity trace used in Fig. 1a2 with a length of 1000 data points and time step  $100 \mu\text{s}$ . The true values of the diffusion coefficient, molecular brightness and background emission rates are,  $10 \mu\text{m}^2/\text{s}$ ,  $5 \times 10^4$  photons/s and  $10^3$  photons/s (shown by green dashed lines). (b1) The posterior of the diffusion coefficient. (b2) The joint probability distribution of diffusion coefficient and molecular brightness. (b3) The posterior probability distribution of the molecular brightness. (b4) The joint probability distribution of the diffusion coefficient and molecular brightness. (b5) The joint probability distribution of the molecular brightness and background photon emission rates. (b6) The posterior probability distribution of the background photon emission rate. The 95% confidence intervals of the posterior of the number of molecules is highlighted in cyan.



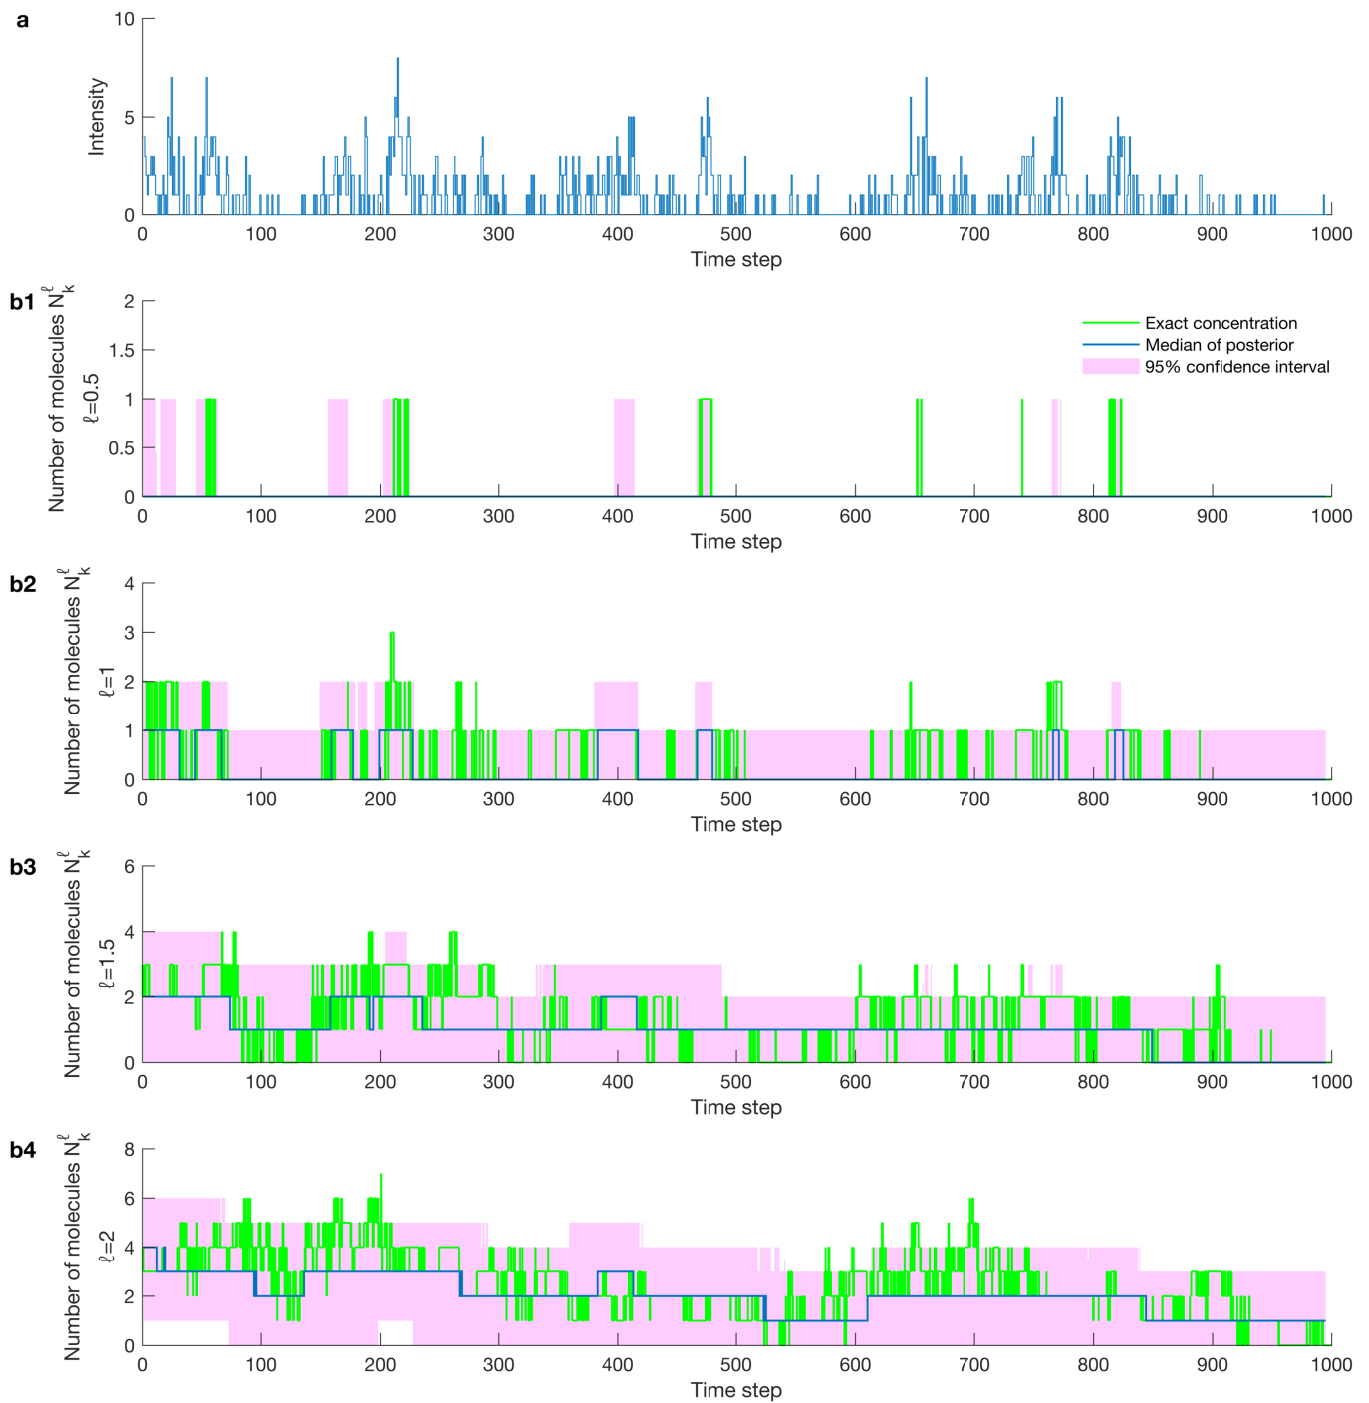

FIG. S3. **Estimated number of molecules/concentrations.** (a) Synthetic fluorescent intensity trace produced with a molecular brightness of  $5 \times 10^4$  photons/s and a background photon emission rate of  $10^3$  photons/s, diffusion coefficient of  $10 \mu\text{m}^2/\text{s}$  and 50 molecules. (b1)–(b4) Number of molecules estimated from the trace in (a) corresponding to normalized distances from the confocal center of  $\ell = 0.5, 1, 1.5, 2$ . The exact number of molecules is shown by the green lines, the median of the posterior over the number of the molecules is shown by the blue lines, and the 95% confidence intervals of the posteriors over the number of the molecules are highlighted in pink. For details of the definition of number of molecules  $N_k^\ell$  and the normalized distance  $\ell$ , see Eq. (S23), below.

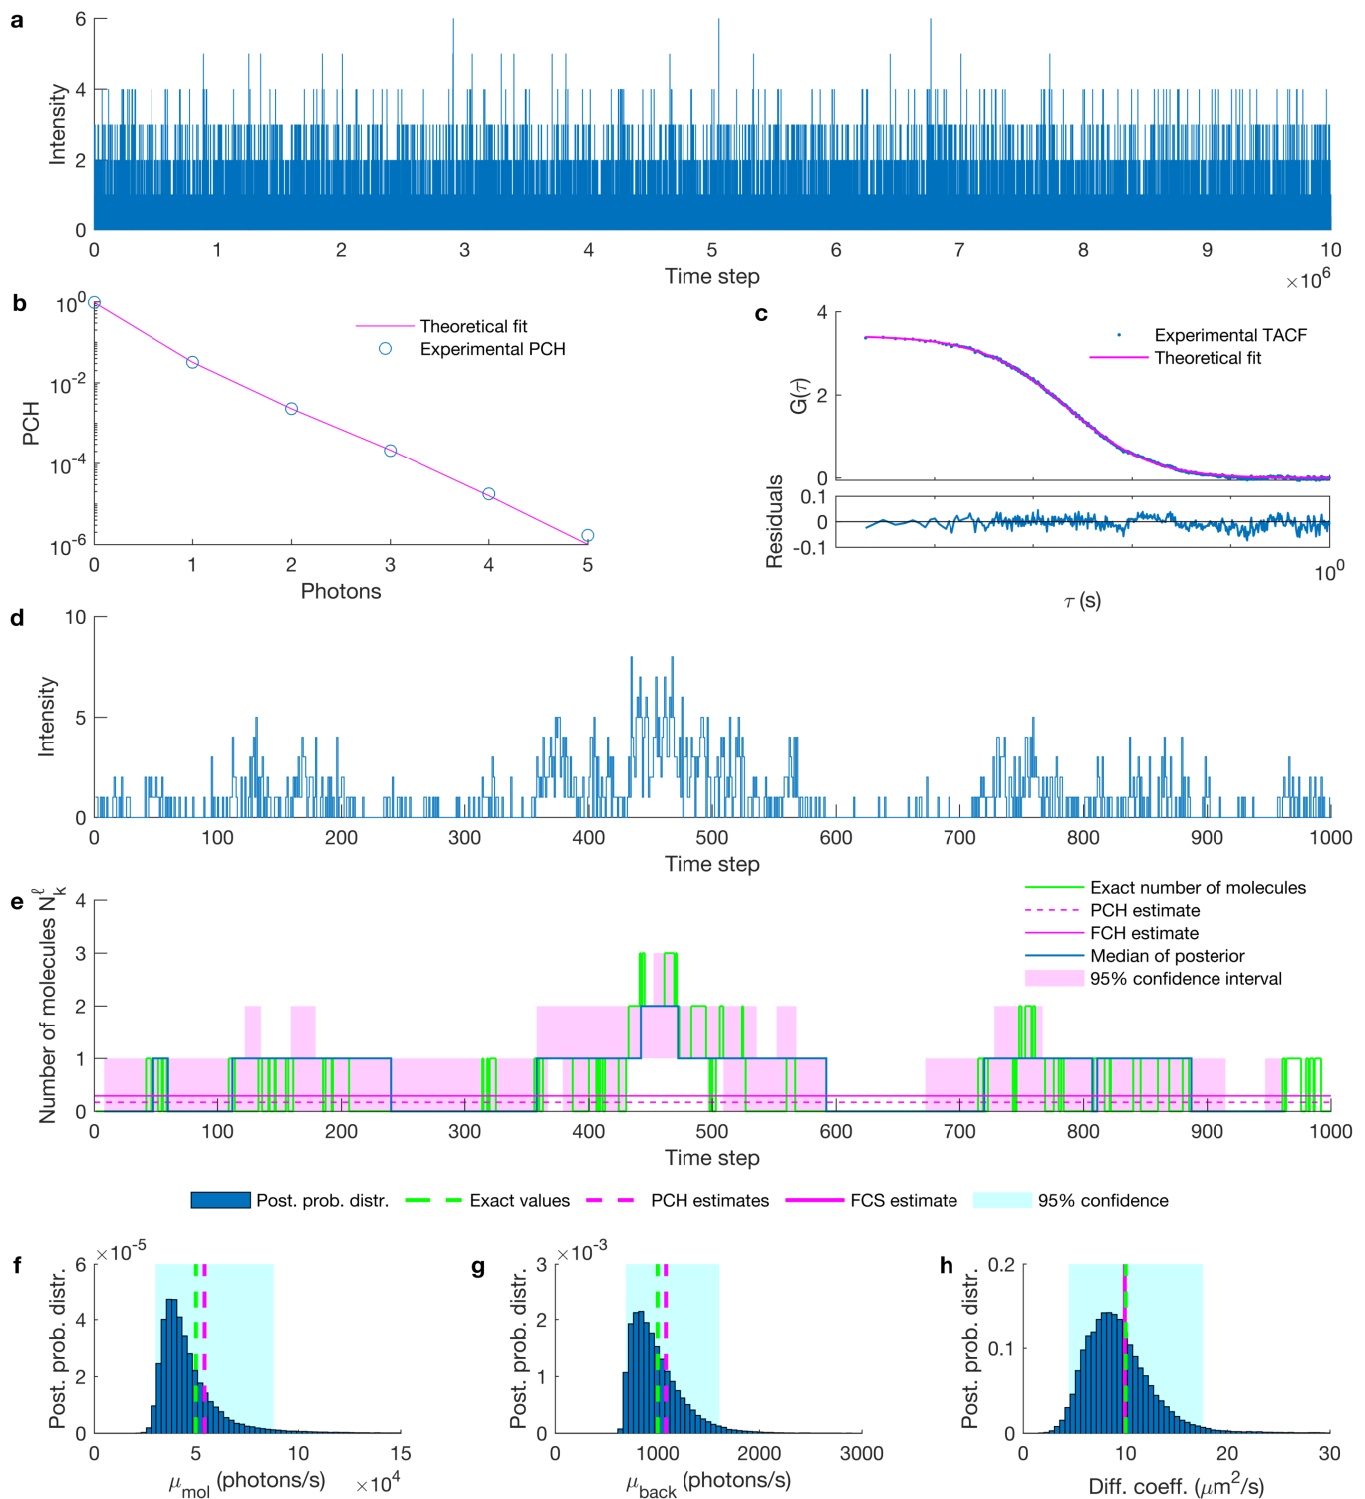

**FIG. S4. Comparison of estimated photon emission rates and concentration with FCS and PCH.** (a) Targeted synthetic fluorescent intensity trace. The time step is  $10 \mu\text{s}$  and the total duration of the trace is 100 s. (b) PCH curve and the theoretical fit. (c) FCS curve and best theoretical fit. (d) The portion of the trace analyzed by our method rebinned at  $100 \mu\text{s}$ . (e) The number of molecules in the effective volume with  $\ell = 1$ , arising from the trace in (d). Exact value of the number of molecules is shown by the green line and the PCH and FCS estimates are shown by the dashed and solid pink lines. (f) On the posterior probability distribution of the molecular brightness we superpose the PCH estimate of the molecular brightness (pink dashed line) and the true value (green dashed line). (g) On the posterior probability distribution of the background photon emission rate we superpose the PCH estimate of the background photon emission rate (pink dashed line) and the true value (green dashed line). (h) On the posterior probability distribution of the diffusion coefficient we superpose the PCH estimate of the diffusion coefficient (pink dashed line) and the true value (green dashed line). (f) The posterior probability distribution of the diffusion coefficient obtained by analyzing the trace in (d). The FCS estimate of the diffusion coefficient obtained by analyzing the total trace, shown in (a), illustrated by a pink dashed line with the exact value (green dashed line). The targeted synthetic trace is generated by freely diffusive molecules with diffusion coefficient, molecular brightness and background photon emission rates of  $10 \mu\text{m}^2/\text{s}$ ,  $5 \times 10^4$  photons/s and  $10^3$  photons/s, respectively.

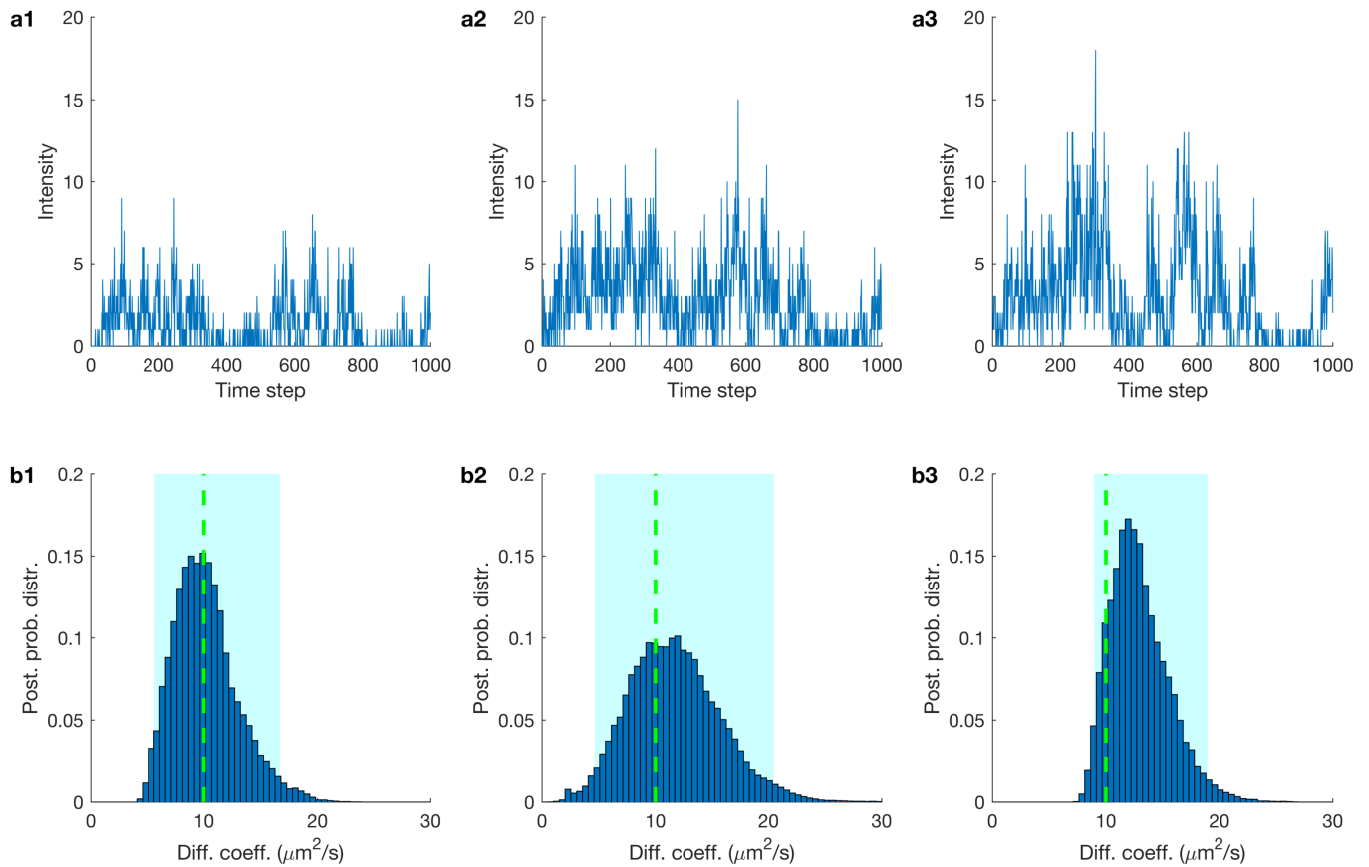

FIG. S5. Comparison of the posterior on the diffusion coefficient obtained from synthetic fluorescent intensity traces under different PSF models. (a1) Synthetic fluorescent intensity trace produced with a 3DG PSF, Eq. (S16). (a2) Synthetic fluorescent intensity trace produced with a 2DGL PSF, Eq. (S18). (a3) Synthetic fluorescent intensity trace produced with a 2DGC PSF, Eq. (S17). (b1) Posterior of the diffusion coefficient using a 3DG PSF model on the trace in (a1). (b2) Posterior of the diffusion coefficient using a 2DGL PSF model on the trace in (a2). (b3) Posterior of the diffusion coefficient using a 2DGC PSF model on the trace in (a3). To facilitate the comparison both traces analyzed are generated using the same underlying molecule trajectories with molecular brightness and background photon emission rates of  $5 \times 10^4$  photons/s and  $10^3$  photons/s, diffusion coefficient of  $1 \mu\text{m}^2/\text{s}$  (shown by green dashed lines).

## **S1.2. Analysis of additional experimental data**



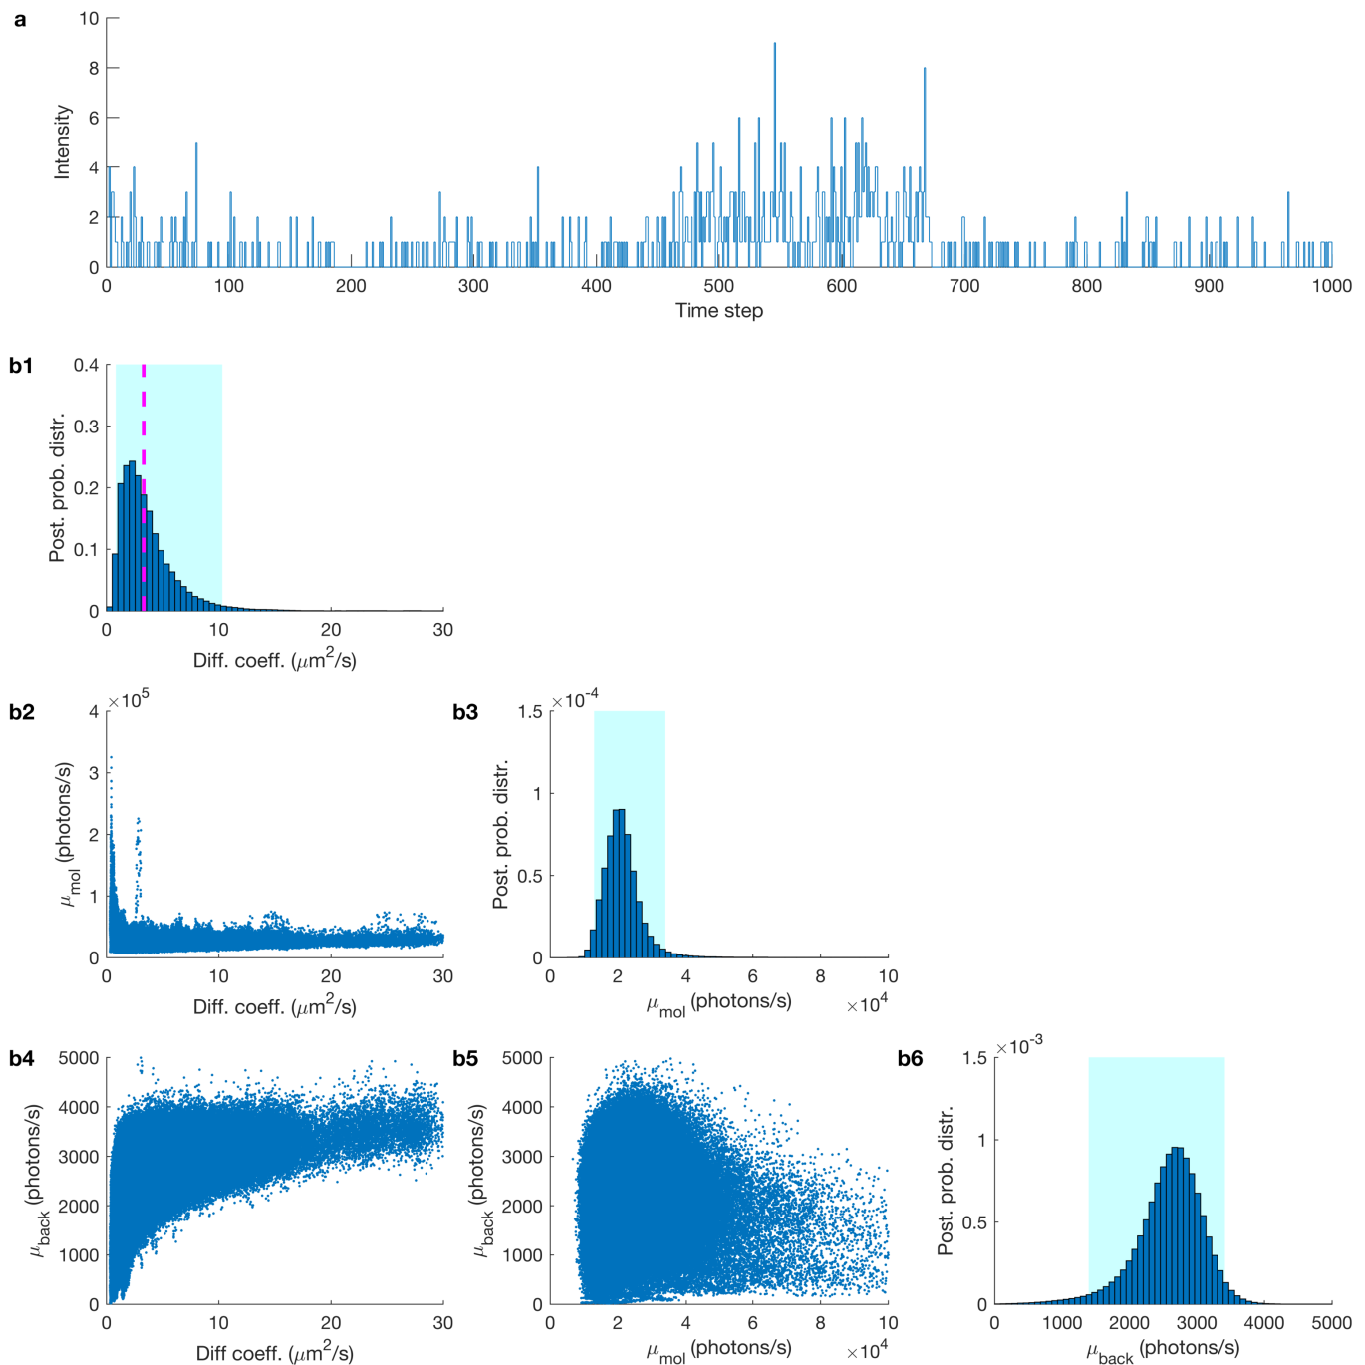

**FIG. S6. Estimated joint posterior probability distribution.** (a) Experimental fluorescent intensity trace used in Fig. 5b3 with a length of 1000 data points and time step  $100 \mu\text{s}$ . (b1) The posterior of the diffusion coefficient. The FCS estimate is shown by a magenta dashed line. (b2) The joint probability distribution of the diffusion coefficient and the molecular brightness. (b3) The posterior probability distribution of the molecular brightness. (b4) The joint probability distribution of the diffusion coefficient and molecular brightness. (b5) The joint probability distribution of the molecular brightness and background photon emission rates. (b6) The posterior probability distribution of the background photon emission rate and the 95% confidence intervals of the posteriors are highlighted in cyan. The experimental fluorescent intensity trace was produced with a concentration of 100 pM of Cy3 in a 94% glycerol/water mixture.

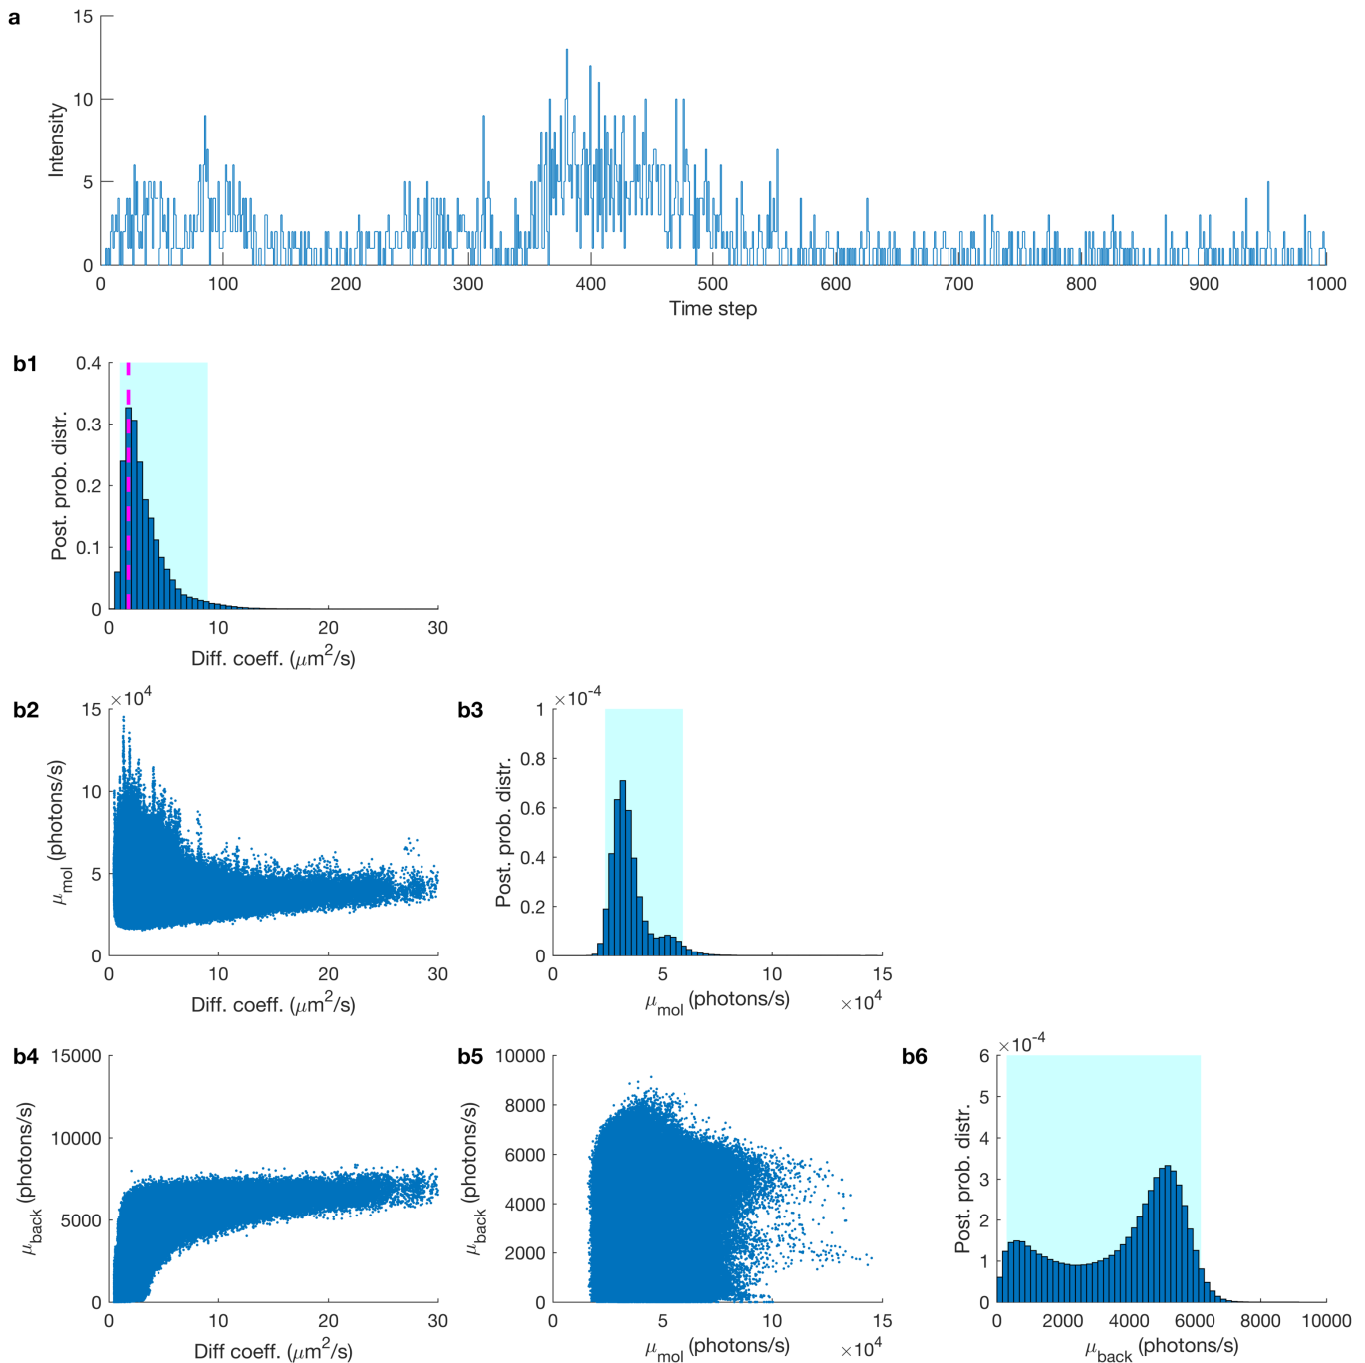

**FIG. S7. Estimated joint posterior probability distribution.** (a) Experimental fluorescent intensity trace used in Fig. 5b4 with a length of 1000 data points and time step  $100 \mu s$ . (b1) The posterior of the diffusion coefficient. The FCS estimate is shown by a magenta dashed line. (b2) The joint probability distribution of the diffusion coefficient and the molecular brightness. (b3) The posterior probability distribution of the molecular brightness. (b4) The joint probability distribution of the diffusion coefficient and the molecular brightness. (b5) The joint probability distribution of the molecular brightness and the background photon emission rates. (b6) The posterior probability distribution of the background photon emission rate and the 95% confidence intervals of the posteriors are highlighted in cyan. The experimental fluorescent intensity trace produced is with a concentration of 1 nM of Cy3 in a 94% glycerol/water mixture.

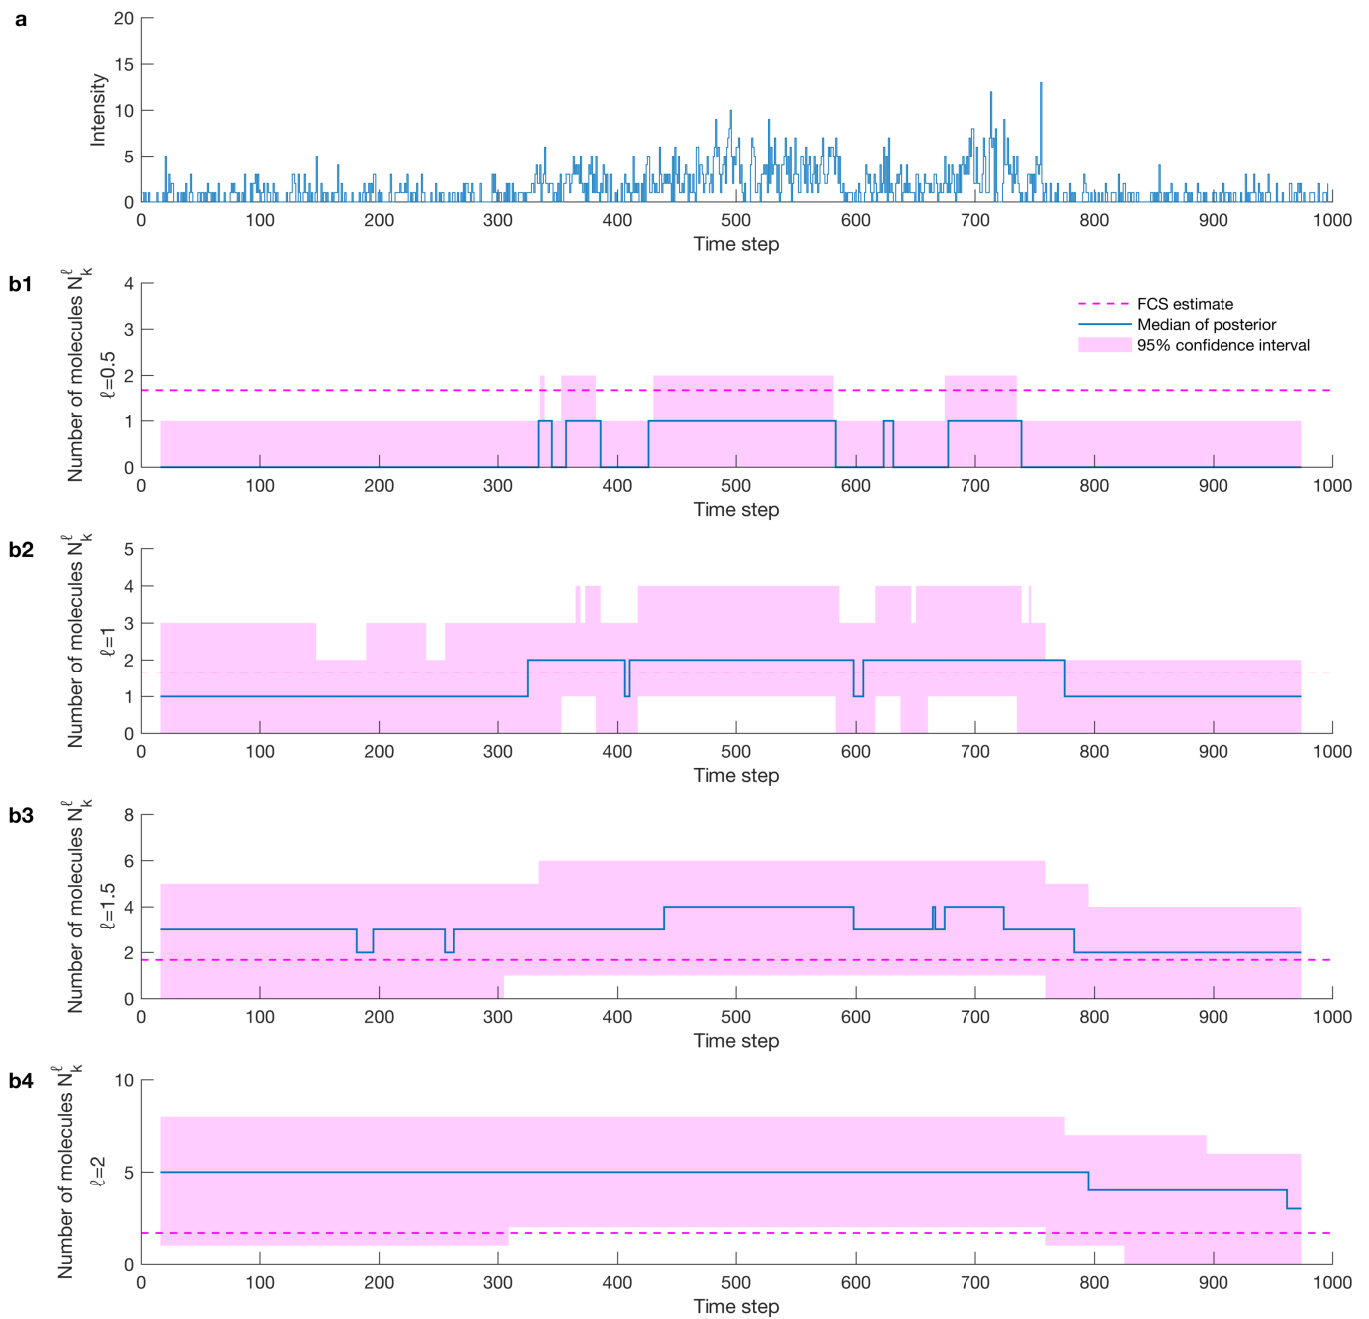

FIG. S8. **Estimated number of molecules/concentrations.** (a) Experimental fluorescent intensity trace produced with a concentration of 1 nM of Cy3 in a 94% glycerol/water mixture. (b1)–(b4) Number of molecules estimated from the trace in (a) with  $\ell = 0.5, 1, 1.5, 2$ , respectively. The FCS estimate of the average number of molecules in the effective volume ( $\sim 1.68$  molecules) by analyzing a 3 minutes long time trace, is shown by the magenta dashed lines and the median of the posterior over the number of the molecules is shown by a blue line. The 95% confidence interval of the posterior over the number of the molecules is highlighted in pink. For details of the definition of number of the molecules  $N_k^\ell$  and the normalized distance  $\ell$ , see Eq. (S23), below.

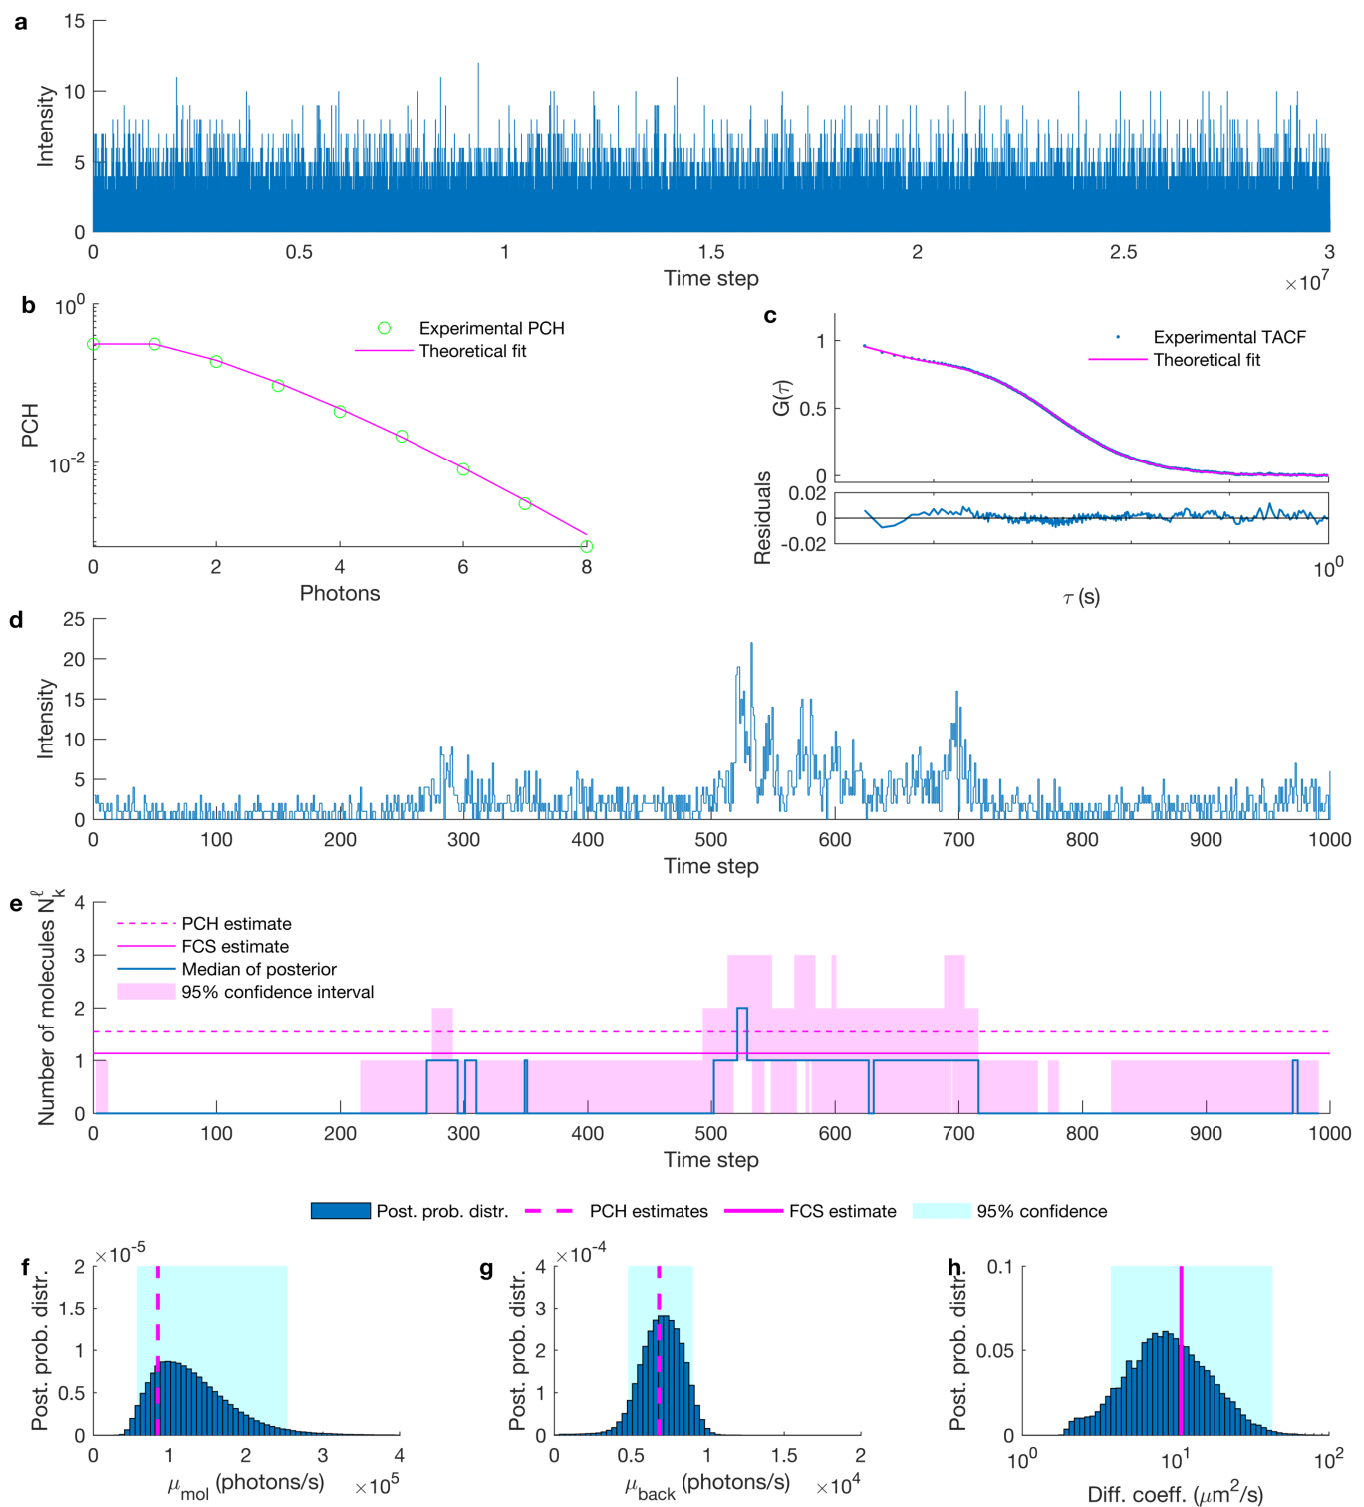

**FIG. S9. Comparison of estimated photon emission rates and concentration with FCS and PCH.** (a) Targeted experimental fluorescent intensity trace. The time step is 10  $\mu$ s with a total time of 5 min. (b) PCH curve and the theoretical fit. (c) FCS curve and the best theoretical fit. (d) The portion of the trace analyzed by our method rebinned at 100  $\mu$ s. (e) The concentration of Cy3 in the effective volume with  $\ell = 1$ , arising from the trace in (d). The experimental concentration is shown by the green line and the PCH estimated is shown by the pink line. (g) The posterior probability distribution of the molecular brightness with the PCH estimated of the molecular brightness shown by a solid green line. (h) The posterior probability distribution of the background photon emission rate with the PCH estimate of the background photon emission rate shown by a solid green line. (f) The posterior probability distribution of the diffusion coefficient obtained by analyzing the trace in (d). The FCS estimate of the diffusion coefficient obtained by analyzing the total time trace, shown in (a), is denoted by a pink solid line. The targeted experimental trace is generated by free diffusive Cy3 in a mixture of water and glycerol with 75% glycerol, a laser power of 100  $\mu$ W and a concentration of Cy3 at 1 nM, excitation wavelength, NA and refractive index used are 532 nm, 1.42 and 1.4, respectively.

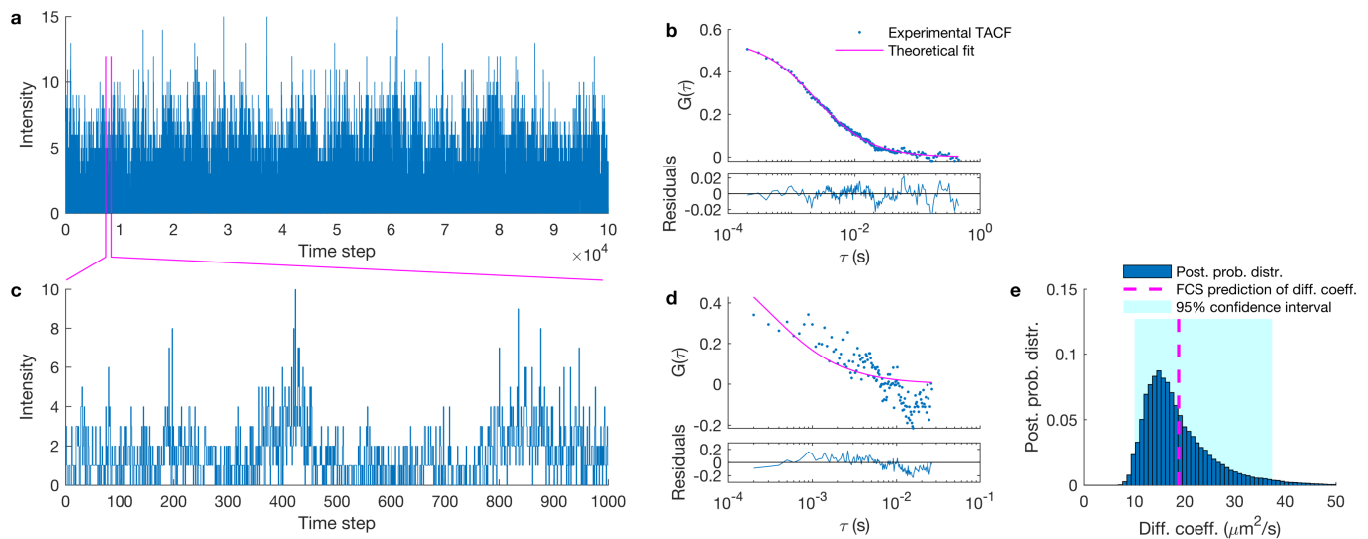

**FIG. S10. Testing diffusion coefficient estimates in experimental traces of free Cy3B dyes using an elongated confocal volume.** (a) Experimental fluorescent intensity trace used in FCS. The time trace is generated by 2.5 nM Cy3B dyes in glycerol/water mixture with 70% glycerol and laser power of  $100 \mu W$ . (b) Auto-correlation curve of the trace in (a) and best theoretical fit. (c) Portion of the trace in (a) to be used as the input to FCS and our method. (d) Auto-correlation curve of trace in (c). (e) Posterior probability distribution over diffusion coefficient estimated from the trace in (c). Traces shown in (a) and (c) are acquired at  $100 \mu s$  for a total of 10 second and 0.1 second respectively. The laser power use to generate the signal (a) is  $100 \mu W$  measured before the beam enters the objective. The estimation of the diffusion coefficient as the results of autocorrelation fitting in (a) matched with Stokes-Einstein prediction, equal to  $18.79 \mu m^2/s$  and in (d) is  $145.75 \mu m^2/s$ .



### **S1.3. Analysis of additional data for multiple diffusive species**

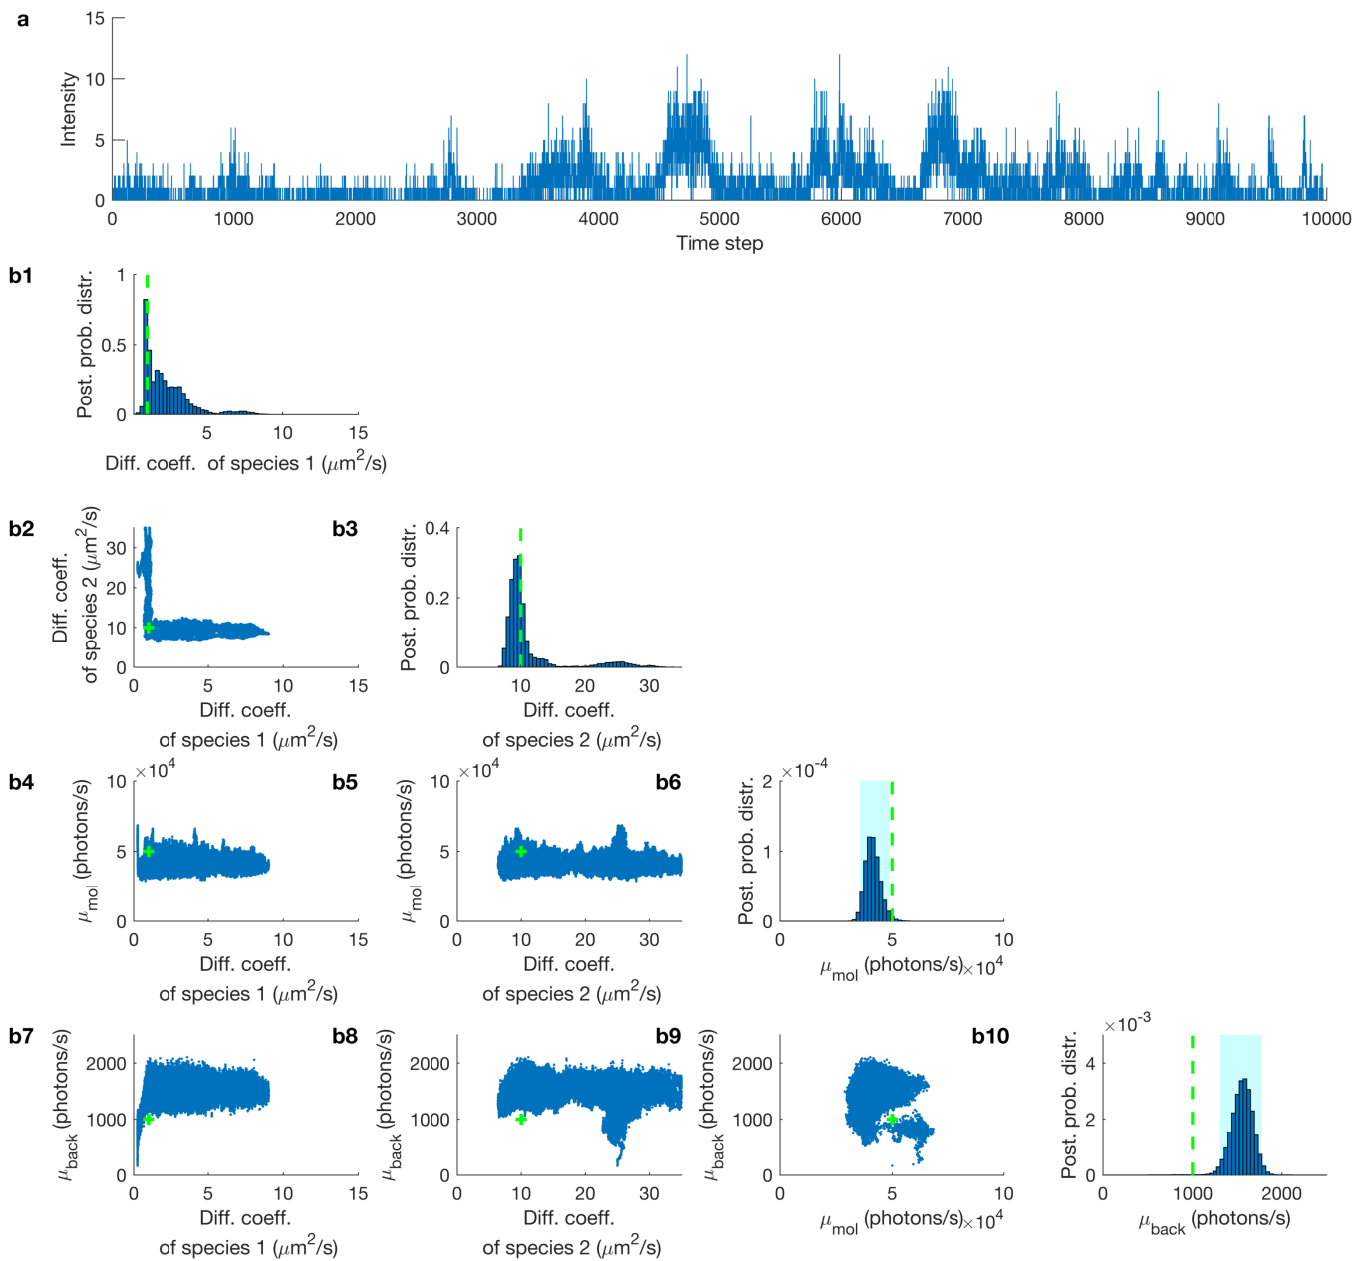

FIG. S11. **Estimated joint posterior probability distribution of multiple diffusive species.** (a) A mixed fluorescent intensity trace was obtained by combining the traces from two different synthetic signals with molecular brightness and background emission rates of  $5 \times 10^4$  and  $10^3$  photons/s, respectively, and diffusion coefficients of 1 and  $10 \mu\text{m}^2/\text{s}$ . (b1) The posterior probability distribution of the diffusion coefficient of diffusive species 1. (b2) The joint probability distribution of the diffusion coefficient for diffusive species 1 and diffusive species 2. (b3) The posterior probability distribution of the diffusion coefficient of diffusive species 2. (b4) The joint probability distribution of diffusion coefficient of diffusive species 1 along with the molecular brightness. (b5) The joint probability distribution of diffusion coefficient of diffusive species 2 along with the molecular brightness. (b6) The posterior probability distribution of the molecular brightness. (b7) The joint probability distribution of diffusion coefficient for diffusive species 1 along with the background photon emission rate. (b8) The joint probability distribution of the diffusion coefficient of diffusive species 2 and the background photon emission rate. (b9) The joint probability distribution of the molecular brightness and background photon emission rate. (b10) The posterior probability distribution of the background photon emission rate. The trace is binned at  $100 \mu\text{s}$  with a total trace duration of 1 s. The exact values of the parameters are shown by green dashed lines and the 95% confidence intervals of the posteriors are highlighted in cyan.

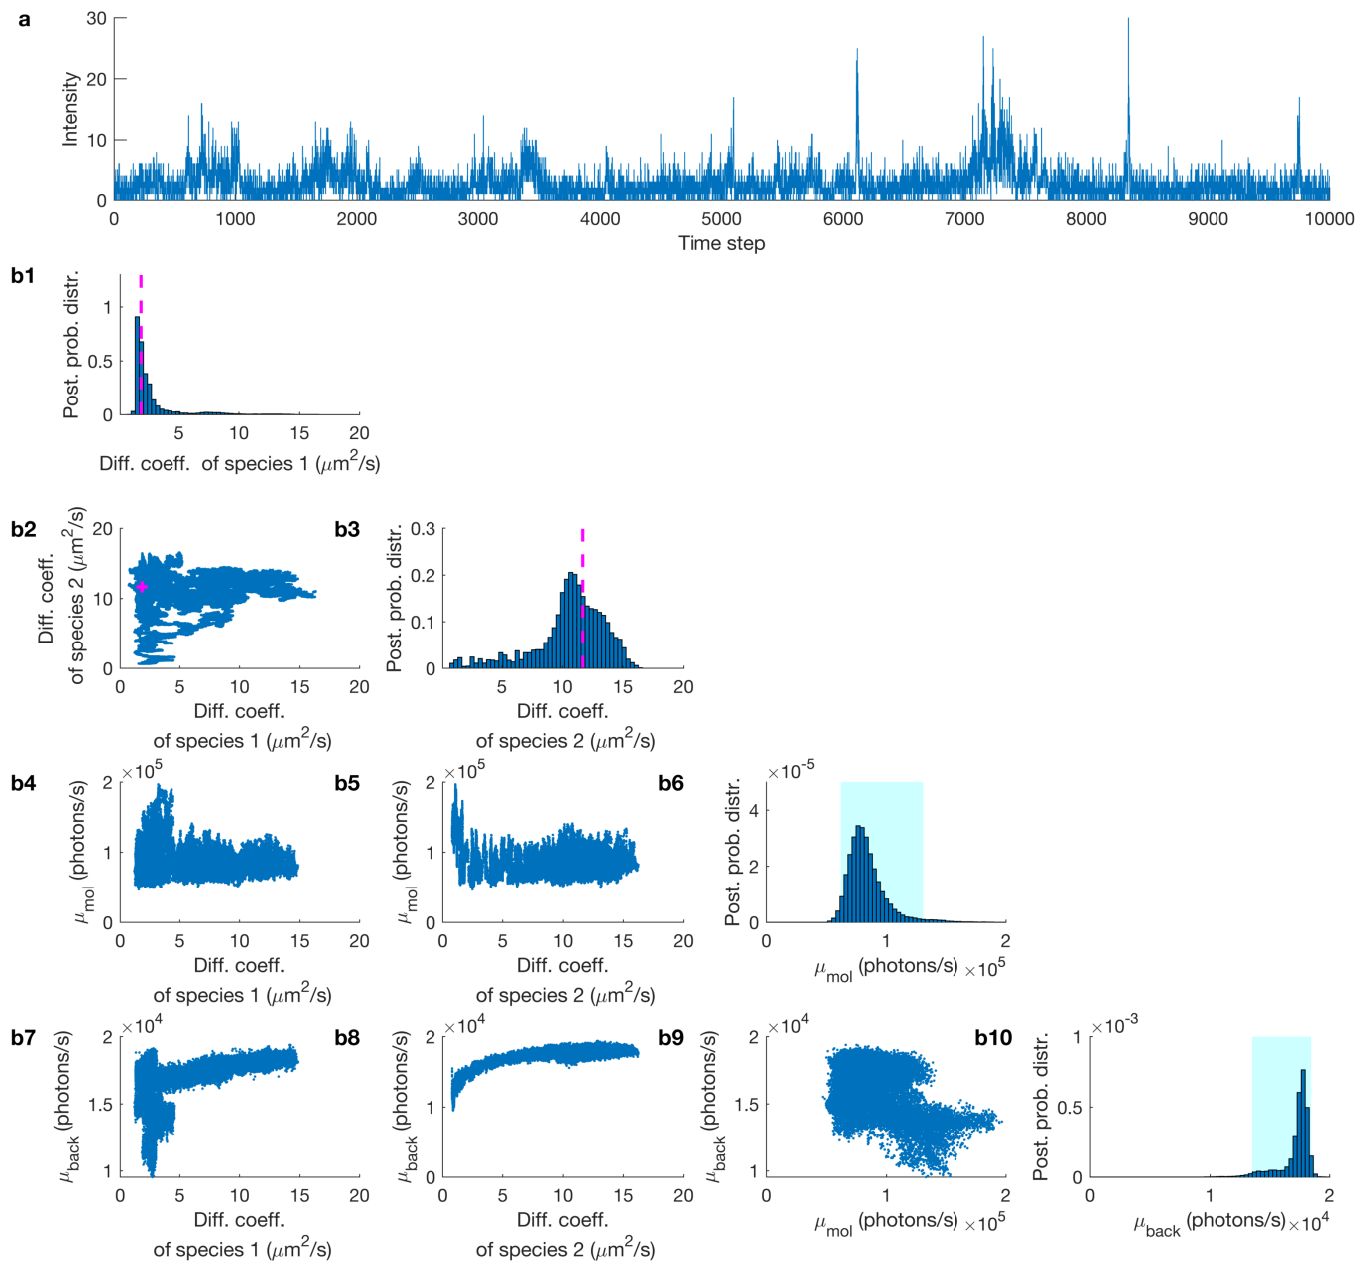

**FIG. S12. Estimated joint posterior probability distribution of multiple diffusive species.** (a) Experimental fluorescent intensity trace used in Fig. 7 a3 with length  $10^4$  data points and step  $100\mu\text{s}$ . (b1) The posterior probability distribution of the diffusion coefficient of diffusive species 1. (b2) The joint probability distribution of diffusion coefficient of diffusive species 1 and diffusive species 2. (b3) The posterior probability distribution of the diffusion coefficient of diffusive species 2. (b4) The joint probability distribution of diffusion coefficient of diffusive species 1 along with the molecular brightness. (b5) The joint probability distribution of diffusion coefficient of diffusive species 2 along with the molecule photon emission rate. (b6) The posterior probability distribution of the molecular brightness. (b7) The joint probability distribution of diffusion coefficient of diffusive species 1 and background photon emission rate. (b8) The joint probability distribution of diffusion coefficient of diffusive species 2 and background photon emission rate. (b9) The joint probability distribution of the molecular brightness and background photon emission rate. (b10) The posterior probability distribution of the background photon emission rate. The trace is generated by mixing two experimental traces of concentration 1 nM of freely diffusive Cy3 in a water/glycerol mixtures with 94% and 75% glycerol each. The laser power, wavelength, NA and refractive index are  $100\mu\text{W}$ , 532 nm, 1.42 and 1.4, respectively. The FCS estimates are shown by a magenta dashed lines and the 95% confidence intervals of the posteriors are highlighted in cyan.

## S2. Summary of point estimates

TABLE S1. Here we list characteristic values (point estimates) summarizing the posterior probability distributions of this study. Mean and std refer to posterior mean value and standard deviation (i.e. square root of variance). Values are listed according to figures.

|             | D                     |                       | $\mu_{mol}$        |                    | $\mu_{back}$       |                    |
|-------------|-----------------------|-----------------------|--------------------|--------------------|--------------------|--------------------|
|             | mean                  | std                   | mean               | std                | mean               | std                |
|             | $\mu m^2/s$           | $\mu m^2/s$           | photons/s          | photons/s          | photons/s          | photons/s          |
| Fig. 1(b1)  | 25.07                 | 20.61                 | $5.06 \times 10^4$ | $1.35 \times 10^4$ | $1.52 \times 10^3$ | $0.40 \times 10^3$ |
| Fig. 1(b2)  | 9.21                  | 2.82                  | $5.96 \times 10^4$ | $1.49 \times 10^4$ | $2.32 \times 10^3$ | $0.79 \times 10^3$ |
| Fig. 2(a)   | $1.07 \times 10^{-2}$ | $0.48 \times 10^{-2}$ | $4.69 \times 10^4$ | $1.31 \times 10^4$ | $1.11 \times 10^3$ | $0.79 \times 10^3$ |
|             | $1.23 \times 10^{-1}$ | $0.64 \times 10^{-1}$ | $4.11 \times 10^4$ | $2.01 \times 10^4$ | $1.46 \times 10^3$ | $1.13 \times 10^3$ |
|             | 1.41                  | 0.67                  | $6.53 \times 10^4$ | $1.50 \times 10^4$ | $3.85 \times 10^3$ | $0.96 \times 10^3$ |
|             | 9.27                  | 2.82                  | $5.96 \times 10^4$ | $1.35 \times 10^4$ | $5.63 \times 10^3$ | $1.48 \times 10^3$ |
| Fig. 2(b)   | 180.45                | 173.25                | $6.11 \times 10^4$ | $5.18 \times 10^4$ | $3.87 \times 10^3$ | $0.31 \times 10^3$ |
|             | 8.75                  | 7.04                  | $3.64 \times 10^4$ | $8.14 \times 10^3$ | $4.64 \times 10^3$ | $2.17 \times 10^3$ |
|             | 10.22                 | 2.98                  | $3.55 \times 10^4$ | $5.54 \times 10^4$ | $4.16 \times 10^3$ | $1.13 \times 10^3$ |
|             | 9.73                  | 1.97                  | $5.64 \times 10^4$ | $8.36 \times 10^3$ | $6.12 \times 10^3$ | $0.56 \times 10^3$ |
|             | 10.53                 | 1.18                  | $5.08 \times 10^4$ | $4.53 \times 10^3$ | $4.87 \times 10^3$ | $0.37 \times 10^3$ |
|             | 10.05                 | 0.42                  | $4.89 \times 10^4$ | $2.13 \times 10^3$ | $1.35 \times 10^3$ | $0.23 \times 10^3$ |
| Fig. 3(a1)  | 10.65                 | 1.68                  | $9.85 \times 10^4$ | $1.36 \times 10^4$ | $2.17 \times 10^3$ | $0.91 \times 10^3$ |
| Fig. 3(a2)  | 10.04                 | 2.38                  | $5.48 \times 10^4$ | $6.47 \times 10^3$ | $2.09 \times 10^3$ | $0.53 \times 10^3$ |
| Fig. 3(a3)  | 11.29                 | 4.14                  | $1.02 \times 10^4$ | $6.97 \times 10^3$ | $2.66 \times 10^3$ | $0.19 \times 10^3$ |
| Fig. 4(c)   | 10.17                 | 3.09                  | $1.46 \times 10^4$ | $1.42 \times 10^3$ | $2.87 \times 10^3$ | $0.43 \times 10^3$ |
| Fig. 5(a)   | 0.55                  | 0.16                  | $2.18 \times 10^4$ | $1.44 \times 10^4$ | $1.79 \times 10^3$ | $2.21 \times 10^3$ |
|             | 2.28                  | 1.03                  | $3.51 \times 10^4$ | $9.21 \times 10^3$ | $3.55 \times 10^3$ | $1.85 \times 10^3$ |
|             | 12.80                 | 4.51                  | $1.30 \times 10^5$ | $5.17 \times 10^4$ | $1.00 \times 10^4$ | $1.96 \times 10^3$ |
|             | 27.96                 | 10.30                 | $9.15 \times 10^4$ | $2.37 \times 10^4$ | $7.01 \times 10^3$ | $0.46 \times 10^3$ |
| Fig. 5(b1)  | 7.50                  | 6.82                  | $2.20 \times 10^4$ | $9.55 \times 10^3$ | $1.06 \times 10^3$ | $0.22 \times 10^3$ |
| Fig. 5(b2)  | 3.68                  | 2.73                  | $4.32 \times 10^4$ | $2.13 \times 10^4$ | $2.59 \times 10^3$ | $0.52 \times 10^3$ |
| Fig. 5(b3)  | 2.70                  | 2.68                  | $2.31 \times 10^4$ | $5.47 \times 10^3$ | $2.94 \times 10^3$ | $2.14 \times 10^3$ |
| Fig. 5(b4)  | 2.28                  | 1.03                  | $3.51 \times 10^4$ | $9.21 \times 10^3$ | $3.55 \times 10^3$ | $1.85 \times 10^3$ |
| Fig. 6(a)   | 0.36                  | 0.22                  | $7.19 \times 10^3$ | $2.31 \times 10^3$ | $1.42 \times 10^3$ | $1.98 \times 10^3$ |
|             | 4.48                  | 1.35                  | $2.75 \times 10^4$ | $3.03 \times 10^3$ | $0.98 \times 10^3$ | $0.94 \times 10^3$ |
|             | 10.66                 | 4.06                  | $6.61 \times 10^4$ | $1.33 \times 10^4$ | $2.33 \times 10^3$ | $1.51 \times 10^3$ |
|             | 102.26                | 27.74                 | $2.36 \times 10^5$ | $5.70 \times 10^4$ | $9.33 \times 10^3$ | $0.77 \times 10^3$ |
| Fig. 6(b1)  | 10.86                 | 4.91                  | $3.42 \times 10^4$ | $2.35 \times 10^4$ | $2.59 \times 10^3$ | $0.59 \times 10^3$ |
| Fig. 6(b2)  | 10.54                 | 4.22                  | $5.03 \times 10^4$ | $2.03 \times 10^4$ | $3.78 \times 10^3$ | $0.62 \times 10^3$ |
| Fig. 6(b3)  | 11.76                 | 6.42                  | $3.12 \times 10^4$ | $6.09 \times 10^3$ | $8.41 \times 10^3$ | $1.21 \times 10^3$ |
| Fig. 6(b4)  | 10.66                 | 4.06                  | $6.61 \times 10^4$ | $1.33 \times 10^4$ | $2.33 \times 10^3$ | $1.51 \times 10^3$ |
| Fig. 7(a1)  | 1.98                  | 0.90                  | $2.09 \times 10^5$ | $2.10 \times 10^4$ | $1.06 \times 10^4$ | $1.64 \times 10^3$ |
| Fig. 7(a2)  | 12.65                 | 3.22                  | $4.22 \times 10^4$ | $1.54 \times 10^4$ | $2.57 \times 10^3$ | $0.49 \times 10^3$ |
| Fig. 7(a3)  | -                     | -                     | $6.79 \times 10^4$ | $4.58 \times 10^3$ | $1.46 \times 10^4$ | $0.71 \times 10^3$ |
| Fig. S4     | 9.44                  | 3.97                  | $4.62 \times 10^4$ | $1.59 \times 10^4$ | $0.98 \times 10^3$ | $0.25 \times 10^3$ |
| Fig. S5(a1) | 10.16                 | 2.81                  | $2.71 \times 10^4$ | $3.63 \times 10^3$ | $2.26 \times 10^3$ | $0.62 \times 10^3$ |
| Fig. S5(a2) | 11.71                 | 4.04                  | $4.89 \times 10^4$ | $1.06 \times 10^4$ | $6.78 \times 10^3$ | $1.79 \times 10^3$ |
| Fig. S5(a3) | 12.93                 | 2.95                  | $6.05 \times 10^4$ | $1.31 \times 10^4$ | $3.34 \times 10^3$ | $0.98 \times 10^3$ |
| Fig. S9     | 15.73                 | 10.43                 | $1.29 \times 10^5$ | $5.17 \times 10^4$ | $7.21 \times 10^3$ | $1.15 \times 10^3$ |
| Fig. S10    | 18.72                 | 7.18                  | $2.63 \times 10^4$ | $5.93 \times 10^3$ | $7.26 \times 10^3$ | $6.46 \times 10^3$ |
| Fig. S11    | -                     | -                     | $4.14 \times 10^4$ | $3.38 \times 10^3$ | $1.55 \times 10^3$ | $0.13 \times 10^3$ |

### S3. Detailed methods description

#### S3.1. Representation of molecular diffusive motion

Consider a particle moving in *1D diffusion*. The probability distribution  $p(x, t)$  of the particle's location obeys Fick's second law [1-3] and is given by the diffusion equation

$$\frac{\partial p}{\partial t} = D \frac{\partial^2 p}{\partial x^2} \quad (\text{S1})$$

where  $D$  is the particle's diffusion coefficient. Assuming the particle is located at  $x_{k-1}$  at a time  $t_{k-1}$ , i.e. assuming the initial condition  $p(x, t_{k-1}) = \delta(x - x_{k-1})$ , and a free space boundary, i.e.  $\lim_{x \rightarrow \pm\infty} p(x, t) = 0$ , we can solve this equation to obtain  $p(x, t)$  for any later time  $t$ . The solution is

$$p(x, t) = \frac{\exp\left(-\frac{(x-x_{k-1})^2}{4(t-t_{k-1})D}\right)}{\sqrt{4\pi(t-t_{k-1})D}} \quad (\text{S2})$$

which equals to the probability density of a normal random variable with mean  $x_{k-1}$  and variance  $2(t - t_{k-1})D$ , see Table S5. At time  $t = t_k$ , we therefore have

$$x_k | x_{k-1} \sim \text{Normal}(x_{k-1}, 2(t_k - t_{k-1})D). \quad (\text{S3})$$

Similarly, solving the diffusion equation for particles following isotropic *3D diffusion* in free space, we have

$$\begin{aligned} x_k | x_{k-1} &\sim \text{Normal}(x_{k-1}, 2(t_k - t_{k-1})D) \\ y_k | y_{k-1} &\sim \text{Normal}(y_{k-1}, 2(t_k - t_{k-1})D) \\ z_k | z_{k-1} &\sim \text{Normal}(z_{k-1}, 2(t_k - t_{k-1})D) \end{aligned} \quad (\text{S4})$$

which constitute the molecular motion model used throughout this study.

#### S3.2. Description of Stokes-Einstein model

For the experimental data, we benchmark our estimates of the diffusion coefficient against the Stokes-Einstein prediction [2, 3]. Namely, for a spherical particle in a quiescent fluid at uniform temperature

$$D = \frac{kT}{6\pi r \eta} \quad (\text{S5})$$

where,  $D$  is the diffusion coefficient,  $k$  is Boltzmann's constant,  $T$  is the solution's absolute temperature,  $r$  is the hydrodynamic radius of the particle [4] and  $\eta$  is the solution's dynamic viscosity [5].

#### S3.3. FCS formulation

The formulation we used in this study to autocorrelate the synthetic and experimental time traces is

$$G_{ex}(\tau) = \frac{\langle \delta I(t + \tau) \delta I(t) \rangle}{\langle \delta I(t) \rangle^2} = \frac{\langle I(t + \tau) I(t) \rangle}{\langle I(t) \rangle^2} - 1 \quad (\text{S6})$$

where the  $I(t)$  is the number of detected photons at time  $t$ . The computational implementation uses the Wiener-Khinchin Theorem [6].

Also, the theoretical function [7-10] used to fit the autocorrelation curves (using a 3DG PSF) is

$$G_{th}(\tau) = \frac{1}{\langle N \rangle} \frac{1 - F + F e^{-\frac{\tau}{\tau_F}}}{(1 - F)} \frac{1}{1 + \frac{4D\tau}{\omega_{xy}^2}} \frac{1}{(1 + \frac{4D\tau}{\omega_z^2})^{\frac{1}{2}}} \quad (\text{S7})$$



88 and for the 2DGL PSFs is

$$89 \quad G_{th}(\tau) = \frac{1}{\langle N \rangle} \frac{1 - F + F e^{-\frac{\tau}{\tau_F}}}{(1 - F)} \frac{1}{1 + \frac{4D\tau}{\omega_{xy}^2}} + 1 \quad (S8)$$

90 where,  $\langle N \rangle$  is the average number of molecule in the effective volume,  $D$  is the diffusion coefficient,  $\tau_F$  is the triplet  
91 state relaxation time and  $F$  is the fraction molecules populating the triplet state.

92 To find the best fit, we use  $\chi^2$  minimization

$$93 \quad \chi^2 = \sum_{\tau} (G_{th}(\tau) - G_{ex}(\tau))^2. \quad (S9)$$

94

### 95 S3.4. Definition of molecular brightness

96 As the definition of molecular brightness, we use the *emission rate of detected photons* of a single fluorophore, for  
97 example Eq. (2). For a fluorophore located at  $(x, y, z)$  this is formulated as

$$98 \quad \mu(x, y, z) = \mu_0 \varphi_d \varphi_{qe} \varphi_f \sigma \text{EXC}(x, y, z) \text{CEF}(x, y, z) \quad (S10)$$

99 where,  $\mu_0$  is the maximum excitation intensity which occurs at the center of the confocal volume,  $\varphi_d$  is the efficiency  
100 of the photon collection at the center of the confocal volume,  $\varphi_{qe}$  is the quantum efficiency of the detector,  $\varphi_f$   
101 is the quantum efficiency of the fluorophore (i.e. quantum yield),  $\sigma$  is the absorption cross-section of the fluorophore,  
102  $\text{EXC}(x, y, z)$  is the excitation profile and  $\text{CEF}(x, y, z)$  is the detection profile, i.e. collection efficiency function, which  
103 equals the fraction of the detected photons to the total photons emitted by a point source [11].

104 To obtain Eq. (2), we cast Eq. (S10) in the simplified form

$$105 \quad \mu(x, y, z) = \mu_{mol} \text{PSF}(x, y, z) \quad (S11)$$

106 where  $\mu_{mol} = \mu_0 \varphi_d \varphi_{qe} \varphi_f \sigma$ , which we term *molecular brightness* at the center of the confocal volume [12], and  
107  $\text{PSF}(x, y, z) = \text{EXC}(x, y, z) \text{CEF}(x, y, z)$ , which we term the PSFPSF.

108 To relate the parameter  $\mu_{mol}$  to the *average photon count rate*, which is commonly estimated in bulk experiments  
109 [13], [14], we consider the spatial average of  $\mu(x, y, z)$  as follows

$$110 \quad \langle \mu(x, y, z) \rangle = \mu_{mol} \langle \text{PSF}(x, y, z) \rangle. \quad (S12)$$

111 For the specific choice of a 3DG PSF (see below), the average is computed as follows

$$112 \quad \langle \text{PSF}(x, y, z) \rangle = \frac{\int_{-\infty}^{+\infty} \int_{-\infty}^{+\infty} \int_{-\infty}^{+\infty} \exp\left(-2\frac{x^2}{\omega_{xy}^2} - 2\frac{y^2}{\omega_{xy}^2} - 2\frac{z^2}{\omega_z^2}\right) dx dy dz}{V_{eff}} = \sqrt{\frac{\pi}{2}\omega_{xy}^2} \sqrt{\frac{\pi}{2}\omega_{xy}^2} \sqrt{\frac{\pi}{2}\omega_z^2} \frac{1}{V_{eff}} \quad (S13)$$

113 where  $V_{eff}$  denotes the effective volume of 3DG PSF [9, 15] and it is given by

$$114 \quad V_{eff} = \pi^{\frac{3}{2}} \omega_{xy}^2 \omega_z. \quad (S14)$$

115 Consequently, Eq. (S13) implies

$$116 \quad \mu_{mol} = \sqrt{8} \langle \mu(x, y, z) \rangle. \quad (S15)$$

117 In other words, the molecular brightness is, by definition, approximately 2.8 times larger than the average photon  
118 count rate of single molecule [13], [14].

### 119 S3.5. Definition of point spread function models

120 In this study we use three different point spread functions as approximations to the more realistic Airy function [16]-  
121 [18], namely a 3D-Gaussian (3DG) [19], a 2D-Gaussian-Cylindrical (2DGC) [19] and a 2D-Gaussian-Lorentzian (2DGL)  
122 [20-23].

123 The definition of the PSF for the 3DG case is

$$124 \quad \text{PSF}_{3\text{DG}}(x, y, z) = \exp\left(-2\frac{x^2 + y^2}{\omega_{xy}^2} - 2\frac{z^2}{\omega_z^2}\right) \quad (\text{S16})$$

125 while, the definition of the PSF for the 2DGC case is

$$126 \quad \text{PSF}_{2\text{DGC}}(x, y, z) = \exp\left(-2\frac{x^2}{\omega_{xy}^2} - 2\frac{y^2}{\omega_{xy}^2}\right). \quad (\text{S17})$$

127 For both cases,  $\omega_{xy}$  and  $\omega_z$  are the semi-axes lateral and parallel to the optical axis. These are represented in terms  
 128 of the excitation wavelength  $\lambda_{\text{exc}}$ , solution refraction index  $n_{\text{sol}}$ , and numerical aperture NA of the microscope as  
 129  $\omega_{xy} = 0.61\lambda_{\text{exc}}/\text{NA}$  and  $\omega_z = 1.5n_{\text{sol}}\lambda_{\text{exc}}/\text{NA}^2$ ; for example see [24, 25]. For more realistic representations,  $\omega_{xy}$  and  
 130  $\omega_z$  can be estimated directly based on calibration experiments with known diffusion coefficients; for example see [26].

131 The definition of the PSF for the 2DGL case is

$$132 \quad \text{PSF}_{2\text{DGL}}(x, y, z) = \frac{1}{1 + \left(\frac{z}{z_R}\right)^2} \exp\left(\frac{-2\frac{x^2 + y^2}{\omega_{xy}^2}}{1 + \left(\frac{z}{z_R}\right)^2}\right) \quad (\text{S18})$$

133 where  $\omega_{xy}$ ,  $\lambda_{\text{exc}}$ , and  $n_{\text{sol}}$  are similar to the 3DG cas or 2DG cases and  $z_R = n_{\text{sol}}\pi\omega_{xy}^2/\lambda_{\text{exc}}$ .

### 134 S3.6. Description of the data simulation

135 To generate fluorescence intensity time traces that mimic a realistic confocal setup, we simulate molecules mov-  
 136 ing [??] through an illuminated 3D volume. The number of moving molecules  $N$  is prescribed in each simulation.  
 137 To maintain a relatively stable concentration of molecules near the confocal volume, and so to avoid generating traces  
 138 where every molecule eventually strays into un-illuminated regions, we impose periodic rectangular boundaries to our  
 139 volume. The boundaries are placed at  $\pm L_{xy}$  perpendicular to the focal plane and  $\pm L_z$  perpendicular to the optical  
 140 axis.

141 We assess the locations of the molecules  $x_k^n, y_k^n, z_k^n$ , where  $k = 1, \dots, K$  label time levels and  $n = 1, \dots, N$  label  
 142 molecules, at equidistant time intervals  $t_1, t_2, \dots, t_K$ . The time interval between successive assessments  $\delta t = t_k - t_{k-1}$ ,  
 143 as well as the total trace duration  $T_{\text{total}} = t_K - t_0$ , are prescribed.

144 Molecule locations at the first assessment  $x_1^n, y_1^n, z_1^n$  are sampled randomly from a uniform distribution with limits  
 145 equal to the boundaries  $\pm L_{xy}$  and  $\pm L_z$  of our pre-specified volume. Subsequent locations are generated according to  
 146 the diffusion model described above under a prescribed diffusion coefficient  $D$ .

147 Finally, we obtain individual photon emissions  $w_k$  by simulating Bernoulli random variables of success probability  
 148  $q_k = 1 - e^{-\mu_k \delta t}$ , where the rate  $\mu_k$  gathers single photon contributions from the background and the entire molecule  
 149 population according to

$$150 \quad \mu_k = \mu_{\text{back}} + \mu_{\text{mol}} \sum_{n=1}^N \text{PSF}(x_k^n, y_k^n, z_k^n) \quad (\text{S19})$$

151 where both background and molecular brightness,  $\mu_{\text{back}}$  and  $\mu_{\text{mol}}$ , are prescribed.

152 The PSF model is also prescribed. To avoid artifacts induced by the periodic boundaries we impose in our volume,  
 153 we ensure that  $L_{xy} \gg \omega_{xy}$ ,  $L_z \gg \omega_z$ , or  $L_z \gg z_R$ , where  $\omega_{xy}$ ,  $\omega_z$  and  $z_R$  characterize the geometry of the confocal  
 154 volume, see Eqs. (S16)–(S18), above.

155 Detailed parameter choices for all simulations performed are listed in Table S6.

### 156 S3.7. Definition of normalized distance and numbers of molecules

157 As we need to estimate the positions of the molecules with respect to the center of the confocal volume, which is  
 158 the point of origin, in order to ultimately estimate the number of molecules as a proxy for molecule concentration, for  
 159 example Figs. S3 and S8, we must address difficulties associated with symmetries of the confocal PSF with respect to

160 rotations around the optical axis or the focal plane. [27] For this, for a molecule at  $(x_k^n, y_k^n, z_k^n)$ , when the 3DG PSF  
 161 is used, Eq. (S16), we rely on

$$d_k^n = \sqrt{\left(\frac{x_k^n}{\omega_{xy}}\right)^2 + \left(\frac{y_k^n}{\omega_{xy}}\right)^2 + \left(\frac{z_k^n}{\omega_z}\right)^2} \quad (\text{S20})$$

163 while, when the 2DGL PSF is used, Eq. (S18), we rely on

$$d_k^n = \sqrt{\frac{1}{2} \log\left(1 + \left(\frac{z_k^n}{z_R}\right)^2\right) + \frac{\left(\frac{x_k^n}{\omega_{xy}}\right)^2 + \left(\frac{y_k^n}{\omega_{xy}}\right)^2}{1 + \left(\frac{z_k^n}{z_R}\right)^2}} \quad (\text{S21})$$

165 where  $d_k^n$  is the normalized distance with respect to the center of the confocal volume of molecule  $n$  at time  $k$ .  
 166 Similarly, when a 2DGC PSF is used, Eq. (S17), we rely on

$$d_k^n = \sqrt{\left(\frac{x_k^n}{\omega_{xy}}\right)^2 + \left(\frac{y_k^n}{\omega_{xy}}\right)^2} \quad (\text{S22})$$

168 where  $d_k^n$  is the normalized distance with respect to the optical axis of molecule  $n$  at time  $k$ .

169 These distances are obtained by setting the respective PSFs equal to  $\exp(-(d_k^n)^2)$  and are unaffected by the  
 170 aforementioned symmetries, i.e.  $x_k^n \mapsto -x_k^n$ ,  $y_k^n \mapsto -y_k^n$ , and  $z_k^n \mapsto -z_k^n$ .

171 For a given normalized distance  $\ell$ , we define the number of molecules  $N_k^\ell$  as the number of estimated (active)  
 172 molecules within the corresponding distance. That is

$$N_k^\ell = \sum_n b^n H\left(1 - \frac{d_k^n}{\ell}\right) \quad (\text{S23})$$

174 where  $H$  is the Heaviside step function,  $b^n$  is the load of molecule  $n$ , and  $V_\ell$  is the volume of a designated effective  
 175 region chosen to agree with the effective volume  $V_{eff}$  used in FCS [9].

### 176 S3.8. Description of the time trace preparation

177 The initial time trace consists of single photon arrival times which are computationally too expensive to analyze.  
 178 Our method instead operates on photon intensity traces which are either obtained directly during an experiment or  
 179 obtained from individual photon arrival time traces after binning. To transform single photon arrival time traces into  
 180 intensity time traces, we use time bins of fixed size (main size) that typically span multiple photon arrival times. To  
 181 speed up the computations further, as some bins have none of very few photons, over certain portions of the trace we  
 182 use larger bins (auxiliary size).

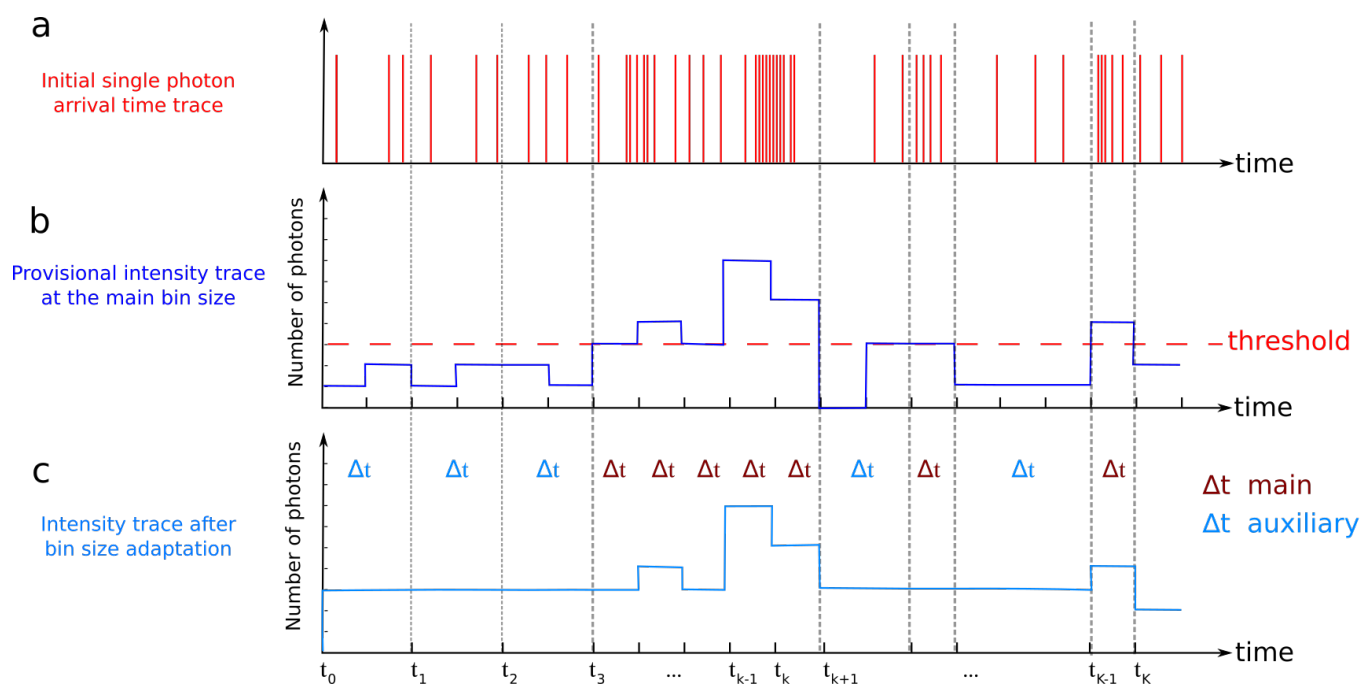

FIG. S13. **Illustration of time trace preparation.** (a) Initial trace of single photon arrivals. Here, each vertical line represents the arrival time of a single photon. (b) Time trace of photon intensities provisionally binned at the main bin size. The horizontal line denotes the imposed lower threshold on the minimum number of photons in the individual bins. (c) Time trace of photon intensities after bin size adaptation. Here, bins, preselected at the main size, with intensities below the imposed threshold are uniformly readjusted to achieve an average intensity similar to the threshold.

183 Briefly, the user specifies a minimum number of photons per bin as a lower threshold. As illustrated in Fig. [S13](#)  
 184 those bins, preselected at the main size, containing fewer photons than the specified threshold are enlarged uniformly  
 185 in order to achieve an average of at least as many photons as specified by the threshold. This occasional adaptation,  
 186 from the main to the auxiliary bins, becomes important in the analysis of traces from experiments held near single  
 187 molecule resolution where molecule concentrations are low so that on average only one molecular passage through  
 188 the confocal volume happens. Consequently, photon intensities are low, and thus the bulk of computational time  
 189 otherwise would have been spent processing trace portions of poor quality (i.e. with few or no photons).

190 To carry out the necessary computations, as we detail shortly, we use the Anscombe transformation [28](#) to approxi-  
 191 approximate the Poissonian likelihoods of photon intensities (see below). This approximation is robust as long as bins  
 192 contain on average 4 photons or more. Thus, as a minimum requirement, we also use the aforementioned threshold  
 193 to ensure the validity of the approximations.

## S4. Detailed description of the inference framework

194

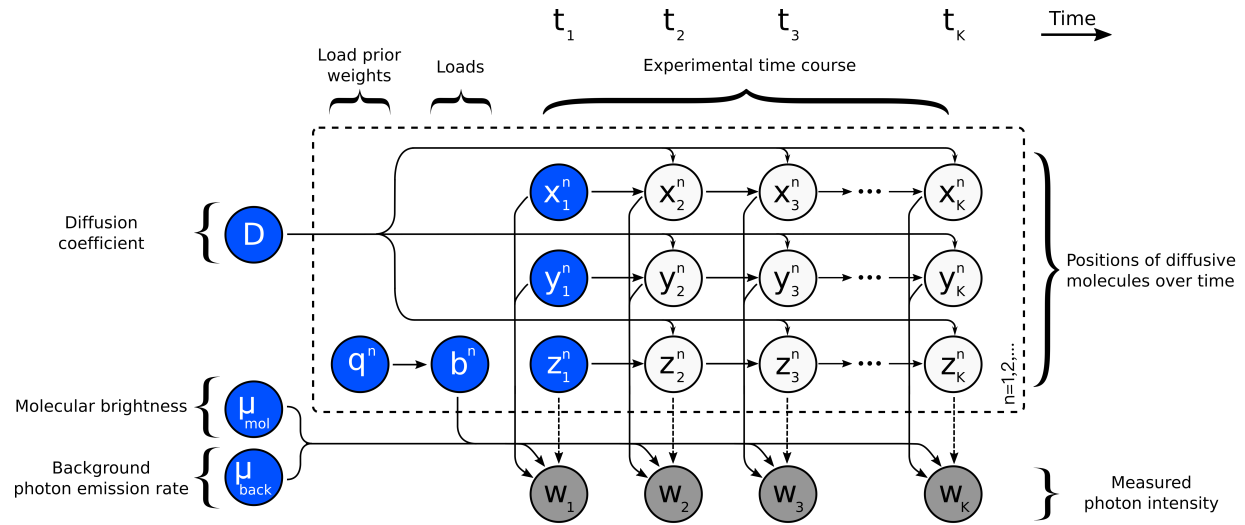

FIG. S14. **Graphical summary of the framework developed.** A population of model molecules, labeled by  $n = 1, 2, \dots$ , evolves during the measurement period which is marked by  $k = 1, 2, \dots, K$ . Here,  $x_k^n, y_k^n$  and  $z_k^n$  denote the position of molecule  $n$  at time  $t_k$  and  $\mu_{mol}, \mu_{back}$  denote the molecular brightness and background photon emission rates. The diffusion coefficient  $D$  determines the evolution of the molecule locations which, in turn, determines the instantaneous photon emission rates and ultimately the recorded photon intensities  $w_k$ . Load variables  $b^n$ , with prior weights  $q^n$ , are introduced to model a molecule population of *a priori* unknown size. Following common machine learning convention, the measurements  $w_k$  are dark shaded. Additionally, model variables requiring prior probability distributions are highlighted in blue.

195

### S4.1. Description of prior probability distributions

196 The model parameters in our framework that require priors are: the diffusion coefficient  $D$ ; the molecular brightness  
 197 and background photon emission rates  $\mu_{mol}$  and  $\mu_{back}$ ; the initial molecule locations  $x_1^n, y_1^n, z_1^n$ ; and load prior weights  
 198  $q^n$ . As we already mentioned in the main text, a prior on the population of diffusing molecules is implicitly defined  
 199 by the prior on both  $b^n$  and  $q^n$ . Our choices are described below.

200

#### S4.1.1. Prior on the diffusion coefficient

201 To ensure that the  $D$  sampled in our formulation attains only positive values, we place an inverse-Gamma prior

$$202 \quad D \sim \mathbf{InvGamma}(\alpha_D, \beta_D). \quad (\text{S24})$$

203 Besides ensuring a positive  $D$ , this prior is also conjugate to the motion model we use which facilitates the computations  
 204 (see below).

205

#### S4.1.2. Priors on molecular brightness and background photon emission rates

206 To ensure that  $\mu_{mol}$  and  $\mu_{back}$  sampled in our formulation attain only positive values, we place Gamma priors on  
 207 both

$$208 \quad \begin{aligned} \mu_{mol} &\sim \mathbf{Gamma}(\alpha_{mol}, \beta_{mol}) \\ \mu_{back} &\sim \mathbf{Gamma}(\alpha_{back}, \beta_{back}). \end{aligned} \quad (\text{S25})$$

209 Due to the specific dependencies of the likelihood (that we will discuss shortly) on the photon emission rates, conjugate  
 210 priors cannot be achieved for  $\mu_{mol}$  and  $\mu_{back}$ . So, the above choice offers no computational advantage (see below) and

could be readily replaced with more physically motivated choices if additional information on molecular brightness becomes available.

### S4.1.3. Priors on initial molecule locations

Due to the symmetries in the confocal PSF, i.e. a molecule at a location  $(x, y, z)$  emits the same average number of photons as a molecule at locations  $(\pm x, \pm y, \pm z)$ , we are unable to gain insight regarding the octant of the 3D Cartesian space in which each molecule is located. To avoid imposing further assumptions on our framework that may determine each molecule's octant uniquely, but may limit the framework's scope to specific experimental setups, we place priors on the initial locations that respect these symmetries. Accordingly, in our framework, at the onset of the measuring period, molecules are equally likely to be located at any of the positions  $(\pm x_1^n, \pm y_1^n, \pm z_1^n)$ .

To facilitate the computations (see below), we place independent symmetric normal distributions, see Table S5 on each Cartesian coordinate of the model molecules

$$\begin{aligned}x_1^n &\sim \mathbf{SymNormal}(\mu_{xy}, \sigma_{xy}^2) \\y_1^n &\sim \mathbf{SymNormal}(\mu_{xy}, \sigma_{xy}^2) \\z_1^n &\sim \mathbf{SymNormal}(\mu_z, \sigma_z^2).\end{aligned}\tag{S26}$$

We want to emphasize that the symmetric priors above do not affect our estimates. According to the motion model we employ, no matter where molecules are initiated, they may subsequently move freely and eventually switch to a different octant if warranted by the data. Our symmetric priors merely indicate that for each individual molecular trajectory considered, there are another 7 symmetric trajectories that are equally likely to have occurred.

### S4.1.4. Priors and hyperpriors for molecule loads

To facilitate the computations (described next), we use a finite, but large, model population consisting of  $N$  molecules containing both active and inactive molecules. These model molecules are collectively indexed by  $n = 1, 2, \dots, N$ . As explained in the main text, estimating how many molecules are actually warranted by the data under analysis is equivalent to estimating how many of those  $N$  molecules are active, i.e.  $b^n = 1$ , while the remaining inactive ones, i.e.  $b^n = 0$ , have no impact whatsoever and are instantiated only for computational purposes.

To ensure that each load  $b^n$  takes only values 0 or 1, we place a Bernoulli prior of weight  $q^n$ . In turn, on each weight  $q^n$ , we place a conjugate Beta hyperprior

$$b^n | q^n \sim \mathbf{Bernoulli}(q^n)\tag{S27}$$

$$q^n \sim \mathbf{Beta}(A_q, B_q).\tag{S28}$$

To ensure that the resulting formulation avoids overfitting, we make the specific choices  $A_q = \alpha_q/N$  and  $B_q = \beta_q(N - 1)/N$ . Under these choices [29-32], and in the limit that  $N \rightarrow \infty$ ; that is, when the assumed molecule population is allowed to be large, this prior/hyperprior converge to a Beta-Bernoulli process. Consequently, for  $N \gg 1$ , the posterior remains well defined and becomes independent of the chosen value of  $N$ . In other words, provided  $N$  is large enough, its impact on the results is insignificant; while its precise value has only computational implications (see below).



## S4.2. Summary of model equations

For concreteness, below we summarize the entire set of equations used in our framework, including a complete list of priors and hyperpriors

$$D \sim \text{InvGamma}(\alpha_D, \beta_D) \quad (\text{S29})$$

$$\mu_{mol} \sim \text{Gamma}(\alpha_{mol}, \beta_{mol}) \quad (\text{S30})$$

$$\mu_{back} \sim \text{Gamma}(\alpha_{back}, \beta_{back}) \quad (\text{S31})$$

$$q^n \sim \text{Beta}\left(\frac{\alpha_q}{N}, \beta_q \frac{N-1}{N}\right) \quad (\text{S32})$$

$$b^n | q^n \sim \text{Bernoulli}(q^n) \quad (\text{S33})$$

$$x_1^n \sim \text{SymNormal}(\mu_{xy}, \sigma_{xy}^2) \quad (\text{S34})$$

$$y_1^n \sim \text{SymNormal}(\mu_{xy}, \sigma_{xy}^2) \quad (\text{S35})$$

$$z_1^n \sim \text{SymNormal}(\mu_z, \sigma_z^2) \quad (\text{S36})$$

$$x_k^n | x_{k-1}^n, D \sim \text{Normal}(x_{k-1}^n, 2(t_k - t_{k-1})D), \quad k = 2, \dots, K \quad (\text{S37})$$

$$y_k^n | y_{k-1}^n, D \sim \text{Normal}(y_{k-1}^n, 2(t_k - t_{k-1})D), \quad k = 2, \dots, K \quad (\text{S38})$$

$$z_k^n | z_{k-1}^n, D \sim \text{Normal}(z_{k-1}^n, 2(t_k - t_{k-1})D), \quad k = 2, \dots, K \quad (\text{S39})$$

$$w_k | \{x_k^n, y_k^n, z_k^n, b^n\}_n, \mu_{mol}, \mu_{back} \sim \text{Poisson}(\mu_k), \quad k = 1, \dots, K \quad (\text{S40})$$

$$\mu_k = (t_k - t_{k-1}) \left( \mu_{back} + \mu_{mol} \sum_n b^n \text{PSF}(x_k^n, y_k^n, z_k^n) \right). \quad (\text{S41})$$

For molecules diffusing in a confocal volume that is extremely elongated over the optical axis, the PSF approaches a cylindrical one. In this case, it is safe to eliminate the  $z_k^n$  positions from the motion model and simplify Eqs. (S40) and (S41) to

$$w_k | \{x_k^n, y_k^n, b^n\}_n, \mu_{mol}, \mu_{back} \sim \text{Poisson}(\mu_k), \quad k = 1, \dots, K \quad (\text{S42})$$

$$\mu_k = (t_k - t_{k-1}) \left( \mu_{back} + \mu_{mol} \sum_n b^n \text{PSF}(x_k^n, y_k^n) \right). \quad (\text{S43})$$

## S4.3. Description of the computational scheme

The joint probability distribution of our framework is  $p(D, \mu_{mol}, \mu_{back}, \{q^n, b^n, \bar{x}^n, \bar{y}^n, \bar{z}^n\}_n | \bar{w})$ , where molecular trajectories and intensities (measurements) are gathered in

$$\bar{x}^n = (x_1^n, x_2^n, \dots, x_K^n) \quad (\text{S44})$$

$$\bar{y}^n = (y_1^n, y_2^n, \dots, y_K^n) \quad (\text{S45})$$

$$\bar{z}^n = (z_1^n, z_2^n, \dots, z_K^n) \quad (\text{S46})$$

$$\bar{w} = (w_1, w_2, \dots, w_K). \quad (\text{S47})$$

Due to the non-linearities in the PSF and the non-parametric prior on  $q^n$  and  $b^n$ , analytic evaluation or direct sampling of this posterior is impossible. For this reason, we develop a specialized Markov chain Monte Carlo (MCMC) scheme that can be used to generate pseudo-random samples [33–37]. This scheme is explained in detail below.

In order to terminate the MCMC sampler, we need to determine when a representative number of samples has been computed. To do so, we divide the samples already computed into four portions and compare the mean values of the diffusion coefficient of the two last ones

$$\eta_1 = \frac{\sum_{i=2I/4}^{3I/4} D_i}{I/4}, \quad \eta_2 = \frac{\sum_{i=3I/4}^I D_i}{I/4} \quad (\text{S48})$$

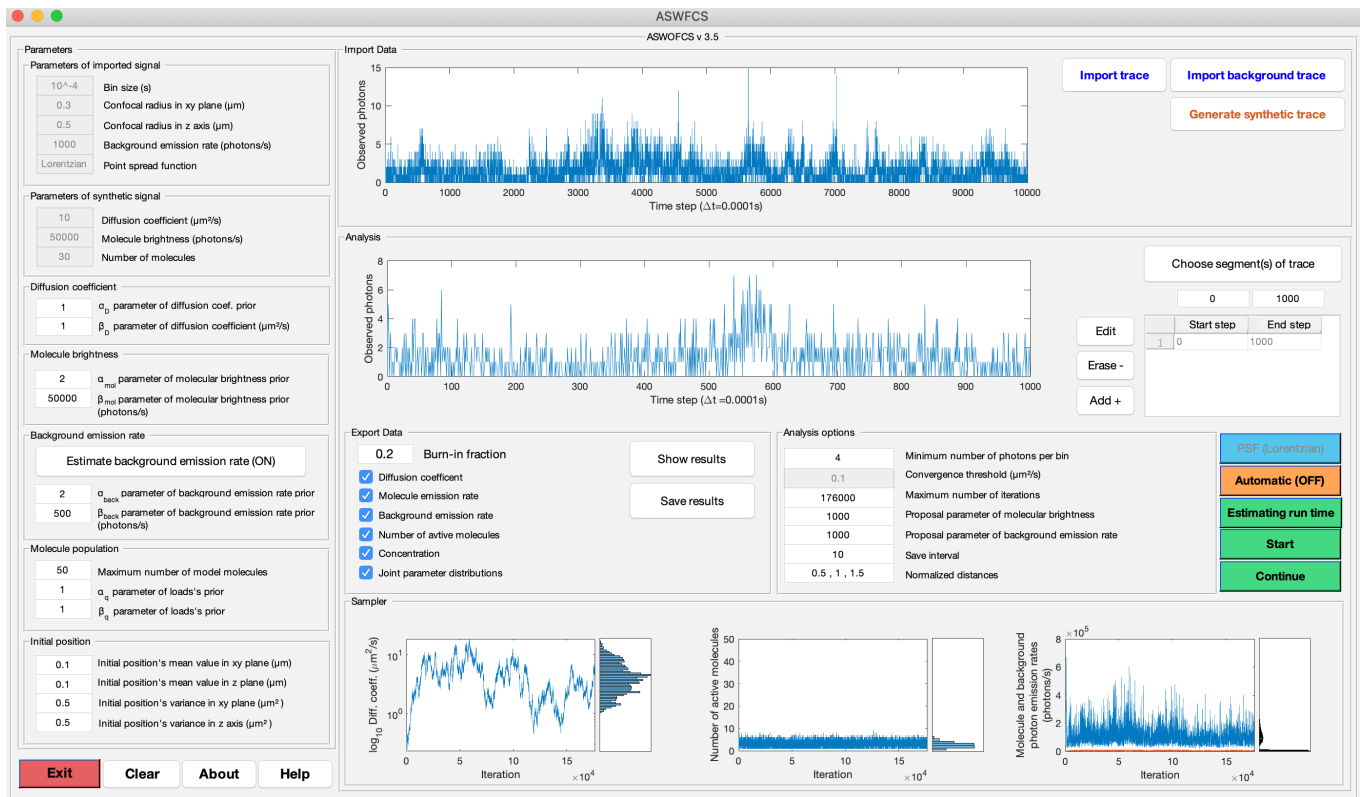

FIG. S15. A working implementation of the framework described in this study is available through the SUPPORTING MATERIAL. Along with this implementation, we provide a graphical user interface (GUI) that can be used to analyze intensity traces from confocal microscopy.

249 where,  $\eta_1$  and  $\eta_2$  are the mean values of the two last portion of the sampled diffusion coefficients denoted  $D_i$  and  $I$  is the  
 250 total number of computed MCMC samples thus far. Following [33, 34], we terminate the sampler when  $|\eta_1 - \eta_2| < \epsilon_{thr}$ ,  
 251 where  $\epsilon_{thr}$  is a pre-specified threshold. Also, to avoid incorporating burn-in samples in the calculations, we ensure a  
 252 minimum number of iterations  $I$  of no less than  $10^4$ .

253 A working implementation of the resulting scheme in source code and GUI forms, see Fig. S15 are available through  
 254 the SUPPORTING MATERIAL.

### 255 S4.3.1. Overview of the sampling updates

256 Our MCMC exploits a Gibbs sampling scheme [33-35]. Accordingly, posterior samples are generated by updating  
 257 each one of the variables involved sequentially by sampling conditioned on all other variables and measurements  $\bar{w}$ .

258 Conceptually, the steps involved in the generation of each posterior sample  $(D, \mu_{mol}, \mu_{back}, \{q^n, b^n, \bar{x}^n, \bar{y}^n, \bar{z}^n\}_n)$   
 259 are:

- 260 (1) For each  $n$  in the molecule population
  - 261 (i) Update trajectory  $\bar{x}^n$  of molecule  $n$
  - 262 (ii) Update trajectory  $\bar{y}^n$  of molecule  $n$
  - 263 (iii) Update trajectory  $\bar{z}^n$  of molecule  $n$
- 264 (2) Update the diffusion coefficient  $D$
- 265 (3) Update jointly the prior weights  $q^n$  for all molecules
- 266 (4) Update jointly the loads  $b^n$  for all molecules
- 267 (5) Update jointly the molecular brightness and background photon emission rates  $\mu_{mol}$  and  $\mu_{back}$ , respectively

268 Since the locations of the inactive molecules are not associated with the measurements  $\bar{w}$ , see Fig. S14 and those are

updated independently of the locations of the active ones, to make the algorithm computationally more efficient we carry out the above scheme in the equivalent order

- (1) For each  $n$  of the *active* molecules
    - (i) Update trajectory  $\bar{x}^n$  of active molecule  $n$
    - (ii) Update trajectory  $\bar{y}^n$  of active molecule  $n$
    - (iii) Update trajectory  $\bar{z}^n$  of active molecule  $n$
  - (2) Update jointly the trajectories  $\bar{x}^n, \bar{y}^n, \bar{z}^n$  for all  $n$  of the *inactive* molecules
  - (3) Update the diffusion coefficient  $D$
  - (4) Update jointly the prior weights  $q^n$  for all model molecules
  - (5) Update jointly the loads  $b^n$  for all model molecules
  - (6) Update jointly the molecular brightness and background photon emission rates  $\mu_{mol}$  and  $\mu_{back}$ , respectively
- These steps are described in detail below.

### S4.3.2. Sampling of active molecule trajectories

For a given active molecule  $n$ , we update the trajectory  $\bar{x}^n$  by sampling from the corresponding conditional  $p(\bar{x}^n | D, \mu_{mol}, \mu_{back}, \{b^{n'}, \bar{y}^{n'}, \bar{z}^{n'}\}_{n'}, \{\bar{x}^{n'}\}_{n' \neq n}, \bar{w})$ , which we achieved through backward sampling [38–40]. To be able to sample a trajectory  $\bar{x}^n$  in backward sampling, we factorize the density  $p(\bar{x}^n | D, \mu_{mol}, \mu_{back}, \{b^{n'}, \bar{y}^{n'}, \bar{z}^{n'}\}_{n'}, \{\bar{x}^{n'}\}_{n' \neq n}, \bar{w})$  as

$$\begin{aligned}
 & p(\bar{x}^n | D, \mu_{mol}, \mu_{back}, \{b^{n'}, \bar{y}^{n'}, \bar{z}^{n'}\}_{n'}, \{\bar{x}^{n'}\}_{n' \neq n}, \bar{w}) \\
 &= p(x_1^n | x_2^n, D, \mu_{mol}, \mu_{back}, \{b^{n'}, y_1^{n'}, z_1^{n'}\}_{n'}, \{x_1^{n'}\}_{n' \neq n}, \bar{w}) \\
 & \times p(x_2^n | x_3^n, D, \mu_{mol}, \mu_{back}, \{b^{n'}, y_2^{n'}, z_2^{n'}\}_{n'}, \{x_2^{n'}\}_{n' \neq n}, \bar{w}) \\
 & \dots \\
 & \times p(x_{K-1}^n | x_K^n, D, \mu_{mol}, \mu_{back}, \{b^{n'}, y_{K-1}^{n'}, z_{K-1}^{n'}\}_{n'}, \{x_{K-1}^{n'}\}_{n' \neq n}, \bar{w}) \\
 & \times p(x_K^n | D, \mu_{mol}, \mu_{back}, \{b^{n'}, y_K^{n'}, z_K^{n'}\}_{n'}, \{x_K^{n'}\}_{n' \neq n}, \bar{w}).
 \end{aligned} \tag{S49}$$

According to this factorization, we sample  $\bar{x}^n$ , starting from  $x_K^n$  and move backward towards  $x_1^n$ . To start the sampling steps, we need to determine each one of the individual densities  $p(x_K^n | D, \mu_{mol}, \mu_{back}, \{b^{n'}, y_K^{n'}, z_K^{n'}\}_{n'}, \{x_K^{n'}\}_{n' \neq n}, \bar{w})$  and  $p(x_k^n | x_{k+1}^n, D, \mu_{mol}, \mu_{back}, \{b^{n'}, y_k^{n'}, z_k^{n'}\}_{n'}, \{x_k^{n'}\}_{n' \neq n}, \bar{w})$ . We do this in a forward filtering approach [27, 38–42] which is described in detail below.

#### S4.3.2.a. Forward filtering

By applying Bayes' rule, each one of the individual densities in Eq. (S49) factorizes as

$$p(x_k^n | x_{k+1}^n, D, \dots, \bar{w}) \propto p(x_{k+1}^n | x_k^n, D) p(x_k^n | D, \dots, w_{1:k}) \tag{S50}$$

where  $w_{1:k}$  is an abbreviation for  $w_1, \dots, w_k$  and excess parameters are shown by dots. Since the density  $p(x_{k+1}^n | x_k^n, D)$  is already known, to sample  $x_k^n$  in backward sampling, we only need to determine the filter density  $p(x_k^n | D, \dots, w_{1:k})$ .

To be able to apply forward filtering and compute  $p(x_k^n | D, \dots, w_{1:k})$  efficiently [43], we use an approximate model [44], where Eq. (S40), is replaced with

$$\mathbb{T}_{data}(w_k) | \{x_k^{n'}, y_k^{n'}, z_k^{n'}, b^{n'}\}_{n'}, \mu_{mol} \sim \mathbf{Normal}(\mathbb{T}_{mean}(\mu_k), 1), \quad k = 1, \dots, K. \tag{S51}$$

Here,  $\mu_k$  stems from Eq. (S41) for 3D models and Eq. (S43) for 2D models; while,  $\mathbb{T}_{data}(w)$  and  $\mathbb{T}_{mean}(\mu)$  denote Anscombe transformed [28] variables defined as follows

$$\mathbb{T}_{data}(w) = 2\sqrt{w + \frac{3}{8}} \tag{S52}$$

$$\mathbb{T}_{mean}(\mu) = 2\sqrt{\mu + \frac{3}{8}} - \frac{1}{4\sqrt{\mu}}. \tag{S53}$$

296 The Anscombe transform exploited here offers a way of transforming Poisson random variables into (approximately)  
 297 normal ones [28] which facilitates the filtering process described next. The approximation we employ is highly accurate  
 298 for  $\mu \gg 1$ , while acceptable accuracy is maintained so long as  $\mu > 4$  photons.

299 Under the Anscombe transform, the densities of both the dynamics, Eq. (S37), and observations, Eq. (S51), are  
 300 normally distributed. So, we can compute the filter distribution  $p(x_k^n|D, \dots, w_{1:k})$  of the approximate model similar  
 301 to the standard theory underlying nonlinear Kalman filters [27, 45–51].

302 More specifically, because the mean of the transformed observation distribution,  $T_{mean}(\mu_k)$  is a nonlinear function  
 303 of the location  $x_k^n$ , to apply the Kalman filters we need to approximate the transformed observation distribution in  
 304 such a way that its mean becomes a linear function of the location  $x_k^n$ . To do so, we use two common approaches:  
 305 (i) extended Kalman filter (EKF) [45, 52–55], which locally approximate the transformed observation distribution  
 306 around selected values; and (ii) unscented Kalman filter (UKF) [46–48], which globally approximate the transformed  
 307 observation distribution.

308 As explained in detail in [27], the linearization alone is not sufficient to properly approximate the filter. This is  
 309 because both EKF and UKF assume that the filter is a normal density. This assumption is problematic for our  
 310 particular case which is symmetric across the origin, i.e. observations provide equal probabilities for the molecule to  
 311 be in negative or positive side of the center of the PSF, i.e.  $\pm x_k^n$ . Due to this symmetry across the  $yz$ -plane, the  
 312 filtering distribution consists of two modes centered symmetrically across the origin [27]. Therefore, we compute an  
 313 approximate filter distribution of the form

$$314 \quad p(x_k^n|D, \dots, w_{1:k}) \approx \mathbf{SymNormal}(x_k^n; m_k^n, c_k^n) \quad (\text{S54})$$

315 where  $\mathbf{SymNormal}(m_k^n, c_k^n)$  denotes the symmetric normal distribution (see Table S5). The filter's parameters  $m_k^n$   
 316 and  $c_k^n$  can be computed recursively according to

$$317 \quad p(x_k^n|D, \dots, w_{1:k}) \propto p(w_k|x_k^n, y_k^n, z_k^n, \mu_{mol}, \mu_{back}, \{b^{n'}, x^{n'}, y^{n'}, z^{n'}\}'_n) \\ \times \int_{x_{k-1}^n} p(x_{k-1}^n|D, \dots, w_{1:k-1}) p(x_k^n|x_{k-1}^n, D) dx_{k-1}^n \quad (\text{S55})$$

318 which, for our model, reduces to

$$319 \quad p(x_k^n|D, \dots, w_{1:k}) \propto \mathbf{Normal}(\mathbb{T}_{data}(w_k); \mathbb{T}_{mean}(\mu_k), 1) \mathbf{SymNormal}(x_k^n; m_{k-1}^n, c_{k-1}^n + 2D(t_k - t_{k-1})) \quad (\text{S56})$$

320 and, in turn, is approximated as

$$321 \quad p(x_k^n|D, \dots, w_{1:k}) \approx \mathbf{SymNormal}(x_k^n; m_k^n, c_k^n). \quad (\text{S57})$$

322 To summarize, in the forward pass of the FFBS, we compute  $m_k^n$  and  $c_k^n$  of the filter of the molecule  $n$ , for all  
 323 time levels  $k = 1, \dots, K$ , by linearizing the approximate model around  $x_1^n = \mu_{xy}$  for  $k = 1$ , and around  $x_k^n = m_{k-1}^n$   
 324 for  $k = 2, \dots, K$ . Since our observation is nonlinear, to calculate the filter, we opt between two different methods:  
 325 (i) Extended Kalman filter (EKF) and (ii) Unscented Kalman filter (UKF).

326 In the EKF, we linearize the observations to obtain a closed form for the filter (local approximation) and in the UKF  
 327 we approximate the joint probability distribution of observations and locations with a multivariate normal distribution  
 328 (global approximation). The reason to use either of these filters is that the EKF is computationally cheaper but less  
 329 accurate. According to our analysis it may fail to provide unbiased estimates of the background photon emission rate.  
 330 On the other hand, the UKF is more robust and provides background emission rate estimates, but these benefits come  
 331 at an increased computational cost.

332 In this study, we provide both filters and allow the user to choose between them.

### 334 Extended Kalman filter

335 Within the EKF approximation, the normal probability distribution preceding the symmetric normal of Eq. (S56) is  
 336 linearized in order for their product to become a symmetric normal one. In this case, we linearize the mean of the  
 337 observation density  $\mathbf{Normal}(\mathbb{T}_{data}(w_k); \mathbb{T}_{mean}(\mu_k), 1)$ , around the modes of the filter in the previous time step

$$338 \quad \mathbb{T}_{mean}(\mu_k(x_k^n)) \approx \mathbb{T}_{mean}(\mu_k(-m_{k-1}^n)) + \frac{\partial \mathbb{T}_{mean}(\mu_k(x_k^n))}{\partial x_k^n} \Big|_{x_k^n = -m_{k-1}^n} (x_k^n + m_{k-1}^n) \\ \mathbb{T}_{mean}(\mu_k(x_k^n)) \approx \mathbb{T}_{mean}(\mu_k(+m_{k-1}^n)) + \frac{\partial \mathbb{T}_{mean}(\mu_k(x_k^n))}{\partial x_k^n} \Big|_{x_k^n = +m_{k-1}^n} (x_k^n - m_{k-1}^n) \quad (\text{S58})$$

339 where the first term linearizes around  $x_k^n = -m_{k-1}^n$  and the second term linearizes around  $x_k^n = +m_{k-1}^n$ . Under these  
340 approximations, (S56) attains an analytical solution. In detail

$$\begin{aligned}
 & \mathbf{Normal}(\mathbb{T}_{data}(w_k); \mathbb{T}_{mean}(\mu_k), 1) \mathbf{SymNormal}(x_k^n; m_{k-1}^n, c_{k-1}^n + 2D(t_k - t_{k-1})) \\
 &= \mathbf{Normal}(\mathbb{T}_{data}(w_k); \mathbb{T}_{mean}(\mu_k), 1) \mathbf{Normal}(x_k^n; -m_{k-1}^n, c_{k-1}^n + 2D(t_k - t_{k-1})) \\
 &+ \mathbf{Normal}(\mathbb{T}_{data}(w_k); \mathbb{T}_{mean}(\mu_k), 1) \mathbf{Normal}(x_k^n; +m_{k-1}^n, c_{k-1}^n + 2D(t_k - t_{k-1})) \\
 &= \mathbf{Normal}\left(x_k^n; -m_{k-1}^n + \frac{e_k^n}{d_k^n}, \frac{1}{(d_k^n)^2}\right) \mathbf{Normal}(x_k^n; -m_{k-1}^n, c_{k-1}^n + 2D(t_k - t_{k-1})) \\
 &+ \mathbf{Normal}\left(x_k^n; +m_{k-1}^n - \frac{e_k^n}{d_k^n}, \frac{1}{(d_k^n)^2}\right) \mathbf{Normal}(x_k^n; +m_{k-1}^n, c_{k-1}^n + 2D(t_k - t_{k-1})) \\
 &= \frac{1}{2} \mathbf{Normal}(x_k^n; -m_k^n, c_k^n) + \frac{1}{2} \mathbf{Normal}(x_k^n; +m_k^n, c_k^n) \\
 &= \mathbf{SymNormal}(x_k^n; m_k^n, c_k^n).
 \end{aligned} \tag{S59}$$

342 The same calculations apply also for  $k = 1$ , where the starting density is replaced with the prior of (S26). In this case  
343

$$\begin{aligned}
 c_1^n &= \frac{\sigma_{xy}^2}{\mathbb{S}(\mu_1)^2 + \sigma_{xy}^2 (d_1^n)^2} \\
 m_1^n &= \mu_{xy} + c_1^n d_1^n e_1^n \\
 d_1^n &= \left. \frac{\partial \mathbb{T}_{mean}(\mu_1(x_1^n))}{\partial x_1^n} \right|_{x_1^n = \mu_{xy}} \\
 e_1^n &= \mathbb{T}_{data}(w_1) - \mathbb{T}_{mean}(\mu_1(x_1^n)) \Big|_{x_1^n = \mu_{xy}}
 \end{aligned} \tag{S60}$$

345 while for  $k = 2, \dots, K$  are

$$\begin{aligned}
 c_k^n &= \frac{(c_{k-1}^n + 2D(t_k - t_{k-1}))}{1 + (c_{k-1}^n + 2D(t_k - t_{k-1})) (d_k^n)^2} \\
 m_k^n &= m_{k-1}^n + c_k^n d_k^n e_k^n \\
 d_k^n &= \left. \frac{\partial \mathbb{T}_{mean}(\mu_k(x_k^n))}{\partial x_k^n} \right|_{x_k^n = m_{k-1}^n} \\
 e_k^n &= \mathbb{T}(w_k) - \mathbb{T}(\mu_k(x_k^n)) \Big|_{x_k^n = m_{k-1}^n}.
 \end{aligned} \tag{S61}$$

### 347 Unscented Kalman filter

348 The unscented Kalman filter [46, 47] tries to fit the joint probability distribution of the observations and locations  
349 globally with a multivariate normal distribution to cope with the nonlinearity in Eq. (S56). Specifically the product  
350 of Eq. (S56) is approximated as follows

$$\begin{aligned}
 & \mathbf{Normal}(\mathbb{T}_{data}(w_k); \mathbb{T}_{mean}(\mu_k), 1) \mathbf{SymNormal}(x_k^n; m_{k-1}^n, c_{k-1}^n + 2D(t_k - t_{k-1})) \\
 & \approx \frac{1}{2} \mathbf{BNormal}\left(\begin{bmatrix} x_k^n \\ \mathbb{T}_{data}(w_k) \end{bmatrix}; \begin{bmatrix} -X_k^n \\ W_k^n \end{bmatrix}, \begin{bmatrix} xx \Sigma_k^n & -xw \Sigma_k^n \\ -wx \Sigma_k^n & ww \Sigma_k^n \end{bmatrix}\right) \\
 & + \frac{1}{2} \mathbf{BNormal}\left(\begin{bmatrix} x_k^n \\ \mathbb{T}_{data}(w_k) \end{bmatrix}; \begin{bmatrix} +X_k^n \\ W_k^n \end{bmatrix}, \begin{bmatrix} xx \Sigma_k^n & +xw \Sigma_k^n \\ +wx \Sigma_k^n & ww \Sigma_k^n \end{bmatrix}\right) \\
 & \propto \frac{1}{2} \mathbf{Normal}(x_k^n; -m_k^n, c_k^n) + \frac{1}{2} \mathbf{Normal}(x_k^n; +m_k^n, c_k^n) \\
 & = \mathbf{SymNormal}(x_k^n; m_k^n, c_k^n)
 \end{aligned} \tag{S62}$$

352 Since we are faced with a filter which has two symmetric modes, we calculate the filter's mean  $m_k^n$  and variance  $c_k^n$   
353 for one of the modes only, while we recover the other mode's mean and variance by reflection.

TABLE S2. Sigma points and corresponding weights for a standard normal according to [59]

| $i$        | 1           | 2       | 3       | 4       | 5       | 6      | 7      | 8      | 9      | 10     | 11          |
|------------|-------------|---------|---------|---------|---------|--------|--------|--------|--------|--------|-------------|
| $x_i^{sn}$ | -5.1880     | -3.9362 | -2.8651 | -1.8760 | -0.9289 | 0      | 0.9289 | 1.8760 | 2.8651 | 3.9362 | 5.1880      |
| $g_i^*$    | $< 10^{-5}$ | 0.0002  | 0.0067  | 0.0661  | 0.2422  | 0.3694 | 0.2422 | 0.0661 | 0.0067 | 0.0002 | $< 10^{-5}$ |

354 The means, auto- and cross-covariances in one mode of the [S62] are given by

$$\begin{aligned}
 X_k^n &= \int_{-\infty}^{+\infty} xq(x)dx \\
 W_k^n &= \int_{-\infty}^{+\infty} \mathbb{T}_{mean}(\mu_k(x))q(x)dx \\
 xx\Sigma_k^n &= \int_{-\infty}^{+\infty} (x - X_k^n)^T(x - X_k^n)q(x)dx \\
 ww\Sigma_k^n &= \int_{-\infty}^{+\infty} (\mathbb{T}_{data}(\mu_k) - W_k^n)^T(\mathbb{T}_{data}(\mu_k) - W_k^n)q(x)dx + 1 \\
 xw\Sigma_k^n &= \int_{-\infty}^{+\infty} (x - X_k^n)^T(\mathbb{T}_{data}(\mu_k) - W_k^n)q(x)dx \\
 wx\Sigma_k^n &= \int_{-\infty}^{+\infty} (\mathbb{T}_{data}(\mu_k) - W_k^n)^T(x - X_k^n)q(x)dx
 \end{aligned} \tag{S63}$$

356 where  $q(x) = \mathbf{Normal}(x; m_{k-1}^n, c_{k-1}^n + 2D(t_k - t_{k-1}))$  is the probability density of one mode of the filter. The same  
 357 formula applies to the other mode too.

358 To calculate the mean value  $m_k^n$  and variance  $c_k^n$  of each normal contributing to the symmetric normal shown above,  
 359 we need to specify a set of sample points, termed *sigma points* in the UKF literature [46-48, 56-58], to estimate the  
 360 mean values and covariance matrix of the bivariate normal on which  $m_k^n$  and  $c_k^n$  depend. To specify sigma points, we  
 361 first calculate sigma points  $x_i^{sn}$  and their weights  $g_i^*$  for a standard normal  $\mathbf{Normal}(x; 0, 1)$  in Table. [S2] according  
 362 to [59]. We then transform  $x_i^{sn}$  that will be used in this  $\mathbf{Normal}(x; m_{k-1}, c_{k-1} + 2D(t_k - t_{k-1}))$ . The transformed  
 363 sigma points are

$$x_i^* = m_{k-1} + x_i^{sn} \sqrt{c_{k-1} + 2D(t_k - t_{k-1})}. \tag{S64}$$

365 Finally, given  $g_i^*, x_i^*$ , we calculate the mean and covariance of the bivariate normal previously introduced by

$$\begin{aligned}
 X_k^n &= \int_{-\infty}^{\infty} xq(x)dx \approx \sum_i g_i^* x_i^* \\
 W_k^n &= \int_{-\infty}^{\infty} \mathbb{T}_x(x)q(x)dx \approx \sum_i g_i^* \mathbb{T}_x(x_i^*) \\
 xx\Sigma_k^n &= \int_{-\infty}^{\infty} (x - x M_k)^T(x - x M_k)q(x)dx \approx \sum_i g_i^* (x M_k - x_i^*)^T (x M_k - x_i^*) \\
 ww\Sigma_k^n &= \int_{-\infty}^{\infty} (\mathbb{T}_x(x) - w M_k)^T(\mathbb{T}_x(x) - w M_k)q(x)dx \approx \sum_i g_i^* (w M_k - \mathbb{T}_x(x_i^*))^T (w M_k - \mathbb{T}_x(x_i^*)) \\
 xw\Sigma_k^n &= \int_{-\infty}^{\infty} (x - x M_k)^T(\mathbb{T}_x(x) - w M_k)q(x)dx \approx \sum_i g_i^* (w M_k - \mathbb{T}_x(x_i^*))^T (x M_k - x_i^*) \\
 wx\Sigma_k^n &= \int_{-\infty}^{\infty} (\mathbb{T}_x(x) - w M_k)^T(x - x M_k)q(x)dx \approx \sum_i g_i^* (x M_k - x_i^*)^T (w M_k - \mathbb{T}_x(x_i^*)).
 \end{aligned} \tag{S65}$$

After computing the means  $X_k^n$  and  $W_k^n$  and auto-covariances and cross-covariances  $xx\Sigma_k$ ,  $ww\Sigma_k$ ,  $xw\Sigma_k$ ,  $wx\Sigma_k$ , the



mean and variance of each mode of the filter are given by

$$m_k^n = X_k^n + K_k^n (\mathbb{T}_{data}(w_k) - W_k^n) \quad (\text{S66})$$

$$c_k^n = {}_{xx} \Sigma_k^n - K_k^n ({}_{ww} \Sigma_k^n) K_k^{nT} \quad (\text{S67})$$

$$K_k^n = \frac{{}_{xw} \Sigma_k^n}{{}_{ww} \Sigma_k^n}. \quad (\text{S68})$$

366

367

#### S4.3.2.b. Backward sampling

After we compute the filter densities  $p(x_k^n | D, \dots, w_1 : k)$  in the forward filtering step, through the EKF or UKF, we are able to sample the location  $x_k^n$  by using backward sampling as in Eq. (S50). Specifically, given a computed filter, we sample sequentially  $x_k^n$  according to

$$x_K^n \sim p\left(x_K^n | \{x_{k'}^n\}_{k' < K}, D, \mu_{mol}, \mu_{back}, \{b^{n'}, \bar{y}^{n'}, \bar{z}^{n'}\}_{n'}, \{\bar{x}^{n'}\}_{n' \neq n}, \bar{w}\right) \quad (\text{S69})$$

$$x_k^n \sim p\left(x_k^n | x_{k+1}^n, \{x_{k'}^n\}_{k' < k}, D, \mu_{mol}, \mu_{back}, \{b^{n'}, \bar{y}^{n'}, \bar{z}^{n'}\}_{n'}, \{\bar{x}^{n'}\}_{n' \neq n}, \bar{w}\right), \quad k = 1, \dots, K-1. \quad (\text{S70})$$

Due to the specific choices of our problem these reduce to

$$x_K^n \sim \text{SymNormal}(m_K^n, c_K^n) \quad (\text{S71})$$

$$x_k^n \sim \text{SymNormal}(m_k^n, c_k^n) \times \text{Normal}(x_{k+1}^n, 2D(t_{k+1} - t_k)), \quad k = 1, \dots, K-1 \quad (\text{S72})$$

368 where  $m_k^n$  and  $c_k^n$  are the parameters of the filter which are calculated in the forward filtering step.

369

#### S4.3.3. Sampling of inactive molecule trajectories

370 After updating the trajectories of the active molecules, we update the trajectories of the inactive ones. For this, we  
 371 sample from the corresponding conditionals  $p(\{\bar{x}^n, \bar{y}^n, \bar{z}^n\}_{n: b^n=0} | D, \mu_{mol}, \mu_{back}, \{q^n, b^n\}_n, \bar{w})$ . Since the locations of  
 372 inactive molecules are not associated with the observations in  $\bar{w}$  and hyper-priors  $\{q^n\}_n$ , these conditionals simplify  
 373 to  $p(\{\bar{x}^n, \bar{y}^n, \bar{z}^n\}_{n: b^n=0} | D, \{b^n\}_n)$  which can be readily simulated jointly in the same manner as standard 3D Brownian  
 374 motion.

375

#### S4.3.4. Sampling of the diffusion coefficient

376 Now that we have updated the locations of active and inactive molecules, we update the diffusion coefficient  $D$  by  
 377 sampling from the corresponding conditional  $p(D | \mu_{mol}, \mu_{back}, \{q^n, b^n, \bar{x}^n, \bar{y}^n, \bar{z}^n\}_n, \bar{w})$ , which, due to the specific de-  
 378 dependencies of the variables in our formulation, e.g. Eqs. (S24), (S37), (S38) and (S39), simplifies to  $p(D | \{\bar{x}^n, \bar{y}^n, \bar{z}^n\}_n)$ .  
 379 Because of conjugacy, the latter reduces to

$$D | \{\bar{x}^n, \bar{y}^n, \bar{z}^n\}_n \sim \text{InvGamma}(\alpha', \beta') \quad (\text{S73})$$

380 where  $\alpha'$  and  $\beta'$  are given by

$$\alpha' = \alpha_D + \frac{3N(K-1)}{2}, \quad \beta' = \beta_D + \frac{1}{4} \sum_{n=1}^N \sum_{k=1}^{K-1} \frac{(x_{k+1}^n - x_k^n)^2 + (y_{k+1}^n - y_k^n)^2 + (z_{k+1}^n - z_k^n)^2}{t_{k+1} - t_k} \quad (\text{S74})$$

383

#### S4.3.5. Sampling of the molecule prior weights and loads

We update the load prior weights  $q^n$  by sampling from the corresponding conditional  $p(\{q^n\}_n | D, \mu_{mol}, \mu_{back}, \{b^n, \bar{x}^n, \bar{y}^n, \bar{z}^n\}_n, \bar{w})$ , which simplifies to  $p(\{q^n\}_n | \{b^n\}_n)$ . For this, we use Eqs. (S33) and (S32), and because of conjugacy, the latter distribution is sampled by sampling each  $q^n$  separately according to

$$p(q^n | b^n) \propto p(b^n | q^n) p(q^n) = \text{Beta}\left(q^n; \frac{\alpha_q}{N} + b^n, \frac{\beta_q(N-1)}{N} + 1 - b^n\right). \quad (\text{S75})$$

Once the weights  $q^n$  are updated, we update the loads  $b^n$  by sampling from the corresponding conditional  $p(\{b^n\}_n | D, \mu_{mol}, \mu_{back}, \{q^n, \bar{x}^n, \bar{y}^n, \bar{z}^n\}_n, \bar{w})$ . We perform this sampling using a Metropolis-Hastings update with proposals of the form

$$(b^n)^{prop} \sim \mathbf{Bernoulli}(q^n). \quad (\text{S76})$$

384 In this case, by choosing the proposal distribution similar to the prior distribution, the acceptance ratio becomes

$$r_b = \prod_{k=1}^K \left[ \left( \frac{\mu_{back} + \mu_{mol} \sum_{n=1}^N (b^n)^{prop} \mathbf{PSF}(x_k^n, y_k^n, z_k^n)}{\mu_{back} + \mu_{mol} \sum_{n=1}^N (b^n)^{old} \mathbf{PSF}(x_k^n, y_k^n, z_k^n)} \right)^{w_k} \right. \\ \left. \times \exp \left( -(t_k - t_{k-1}) \mu_{mol} \sum_{n=1}^N \left( (b^n)^{old} - (b^n)^{prop} \right) \mathbf{PSF}(x_k^n, y_k^n, z_k^n) \right) \right] \quad (\text{S77})$$

386 where  $(b^n)^{old}$  denotes the existing sample.

#### 387 S4.3.6. Joint sampling of the molecular brightness and background photon emission rates

388 Finally, after we updated the locations of molecules, and loads, we update the molecular brightness  
389 and background photon emission rates  $\mu_{mol}$  and  $\mu_{back}$  by sampling from the corresponding conditional  
390  $p(\mu_{mol}, \mu_{back} | D, \{q^n, b^n, \bar{x}^n, \bar{y}^n, \bar{z}^n\}_n, \bar{w})$ , which simplifies to  $p(\mu_{mol}, \mu_{back} | \{b^n, \bar{x}^n, \bar{y}^n, \bar{z}^n\}_n, \bar{w})$ . We carry over this  
391 sampling using a Metropolis-Hastings update where proposals for  $\mu_{mol}$  and  $\mu_{back}$  are computed according to

$$\mu_{mol}^{prop} \sim \mathbf{Gamma} \left( \alpha_{mol}^{prop}, \frac{\mu_{mol}^{old}}{\alpha_{mol}^{prop}} \right) \\ \mu_{back}^{prop} \sim \mathbf{Gamma} \left( \alpha_{back}^{prop}, \frac{\mu_{back}^{old}}{\alpha_{back}^{prop}} \right) \quad (\text{S78})$$

393 where  $\mu_{mol}^{old}$  and  $\mu_{back}^{old}$  denote the existing samples. The acceptance ratio is

$$r_\mu = \prod_{k=1}^K \left[ \left( \frac{\mu_{back}^{prop} + \mu_{mol}^{prop} \sum_{n=1}^N b^n \mathbf{PSF}(x_k^n, y_k^n, z_k^n)}{\mu_{back}^{old} + \mu_{mol}^{old} \sum_{n=1}^N b^n \mathbf{PSF}(x_k^n, y_k^n, z_k^n)} \right)^{w_k} \right. \\ \left. \times \exp \left( (t_k - t_{k-1}) \left( (\mu_{back}^{old} - \mu_{back}^{prop}) + (\mu_{mol}^{old} - \mu_{mol}^{prop}) \sum_{n=1}^N b^n \mathbf{PSF}(x_k^n, y_k^n, z_k^n) \right) \right) \right] \\ \times \left( \frac{\mu_{mol}^{old}}{\mu_{mol}^{prop}} \right)^{2\alpha_{mol}^{prop} - \alpha_{mol}^{old}} \exp \left( \frac{\mu_{mol}^{old} - \mu_{mol}^{prop}}{\beta_{mol}} + \alpha_{mol}^{prop} \left( \frac{\mu_{mol}^{prop}}{\mu_{mol}^{old}} - \frac{\mu_{mol}^{old}}{\mu_{mol}^{prop}} \right) \right) \\ \times \left( \frac{\mu_{back}^{old}}{\mu_{back}^{prop}} \right)^{2\alpha_{back}^{prop} - \alpha_{back}^{old}} \exp \left( \frac{\mu_{back}^{old} - \mu_{back}^{prop}}{\beta_{back}} + \alpha_{back}^{prop} \left( \frac{\mu_{back}^{prop}}{\mu_{back}^{old}} - \frac{\mu_{back}^{old}}{\mu_{back}^{prop}} \right) \right). \quad (\text{S79})$$

395 We should emphasize, due to the weakness of the extended Kalman filter as compared to the unscented Kalman filter,  
396 we consider the background photon emission rate is fixed for EKF. So, in this case we update the molecular brightness  
397  $\mu_{mol}$  only by sampling from the corresponding conditional  $p(\mu_{mol} | D, \{q^n, b^n, \bar{x}^n, \bar{y}^n, \bar{z}^n\}_n, \bar{w})$ , which simplifies to  
398  $p(\mu_{mol} | \{b^n, \bar{x}^n, \bar{y}^n, \bar{z}^n\}_n, \bar{w})$ . Again, we carry over this sampling using a Metropolis-Hastings update where proposals  
399 for  $\mu_{mol}$  are computed according to

$$\mu_{mol}^{prop} \sim \mathbf{Gamma} \left( \alpha_{mol}^{prop}, \frac{\mu_{mol}^{old}}{\alpha_{mol}^{prop}} \right) \quad (\text{S80})$$

400

401 and the acceptance ration will reduces to

$$\begin{aligned}
 r_{\mu} &= \prod_{k=1}^K \left[ \left( \frac{\mu_{back} + \mu_{mol}^{prop} \sum_{n=1}^N b^n \mathbf{PSF}(x_k^n, y_k^n, z_k^n)}{\mu_{back} + \mu_{mol}^{old} \sum_{n=1}^N b^n \mathbf{PSF}(x_k^n, y_k^n, z_k^n)} \right)^{w_k} \right. \\
 &\times \exp \left( (t_k - t_{k-1}) \left( (\mu_{mol}^{old} - \mu_{mol}^{prop}) \sum_{n=1}^N b^n \mathbf{PSF}(x_k^n, y_k^n, z_k^n) \right) \right) \left. \right] \\
 &\times \left( \frac{\mu_{mol}^{old}}{\mu_{mol}^{prop}} \right)^{2\alpha_{mol}^{prop} - \alpha_{mol}} \exp \left( \frac{\mu_{mol}^{old} - \mu_{mol}^{prop}}{\beta_{mol}} + \alpha_{mol}^{prop} \left( \frac{\mu_{mol}^{prop}}{\mu_{mol}^{old}} - \frac{\mu_{mol}^{old}}{\mu_{mol}^{prop}} \right) \right).
 \end{aligned} \tag{S81}$$

403

## S5. Extension for multiple diffusive species

In the case of more than one diffusive species, we can readily modify the model to capture multiple diffusion coefficients. To show that our method can be extended, we consider two diffusive species. Namely, the extended formulation is

$${}_1D \sim \mathbf{InvGamma}(\alpha_D, \beta_D) \quad (\text{S82})$$

$${}_2D \sim \mathbf{InvGamma}(\alpha_D, \beta_D) \quad (\text{S83})$$

$$\mu_{mol} \sim \mathbf{Gamma}(\alpha_{mol}, \beta_{mol}) \quad (\text{S84})$$

$$\mu_{back} \sim \mathbf{Gamma}(\alpha_{back}, \beta_{back}) \quad (\text{S85})$$

$${}_1q^n \sim \mathbf{Beta}\left(\frac{\alpha_q}{{}_1N}, \beta_q \frac{{}_1N - 1}{{}_1N}\right) \quad (\text{S86})$$

$${}_1b^n | {}_1q^n \sim \mathbf{Bernoulli}({}_1q^n) \quad (\text{S87})$$

$${}_2q^n \sim \mathbf{Beta}\left(\frac{\alpha_q}{{}_2N}, \beta_q \frac{{}_2N - 1}{{}_2N}\right) \quad (\text{S88})$$

$${}_2b^n | {}_2q^n \sim \mathbf{Bernoulli}({}_2q^n) \quad (\text{S89})$$

$${}_1x_1^n \sim \mathbf{SymNormal}(\mu_{xy}, \sigma_{xy}^2) \quad (\text{S90})$$

$${}_1y_1^n \sim \mathbf{SymNormal}(\mu_{xy}, \sigma_{xy}^2) \quad (\text{S91})$$

$${}_1z_1^n \sim \mathbf{SymNormal}(\mu_z, \sigma_z^2) \quad (\text{S92})$$

$${}_1x_k^n | {}_1x_{k-1}^n, {}_1D \sim \mathbf{Normal}({}_1x_{k-1}^n, 2(t_k - t_{k-1}){}_1D), \quad k = 2, \dots, K \quad (\text{S93})$$

$${}_1y_k^n | {}_1y_{k-1}^n, {}_1D \sim \mathbf{Normal}({}_1y_{k-1}^n, 2(t_k - t_{k-1}){}_1D), \quad k = 2, \dots, K \quad (\text{S94})$$

$${}_1z_k^n | {}_1z_{k-1}^n, {}_1D \sim \mathbf{Normal}({}_1z_{k-1}^n, 2(t_k - t_{k-1}){}_1D), \quad k = 2, \dots, K \quad (\text{S95})$$

$${}_2x_1^n \sim \mathbf{SymNormal}(\mu_{xy}, \sigma_{xy}^2) \quad (\text{S96})$$

$${}_2y_1^n \sim \mathbf{SymNormal}(\mu_{xy}, \sigma_{xy}^2) \quad (\text{S97})$$

$${}_2z_1^n \sim \mathbf{SymNormal}(\mu_z, \sigma_z^2) \quad (\text{S98})$$

$${}_2x_k^n | {}_2x_{k-1}^n, {}_2D \sim \mathbf{Normal}({}_2x_{k-1}^n, 2(t_k - t_{k-1}){}_2D), \quad k = 2, \dots, K \quad (\text{S99})$$

$${}_2y_k^n | {}_2y_{k-1}^n, {}_2D \sim \mathbf{Normal}({}_2y_{k-1}^n, 2(t_k - t_{k-1}){}_2D), \quad k = 2, \dots, K \quad (\text{S100})$$

$${}_2z_k^n | {}_2z_{k-1}^n, {}_2D \sim \mathbf{Normal}({}_2z_{k-1}^n, 2(t_k - t_{k-1}){}_2D), \quad k = 2, \dots, K \quad (\text{S101})$$

$$w_k | \{{}_1x_k^n, {}_1y_k^n, {}_1z_k^n, {}_2x_k^n, {}_2y_k^n, {}_2z_k^n, {}_1b^n, {}_2b^n\}_n, \mu_{mol}, \mu_{back} \sim \mathbf{Poisson}(\mu_k), \quad k = 1, \dots, K \quad (\text{S102})$$

$$\mu_k = (t_k - t_{k-1}) \left( \mu_{back} + \mu_{mol} \sum_n {}_1b^n \text{PSF}({}_1x_k^n, {}_1y_k^n, {}_1z_k^n) + \mu_{mol} \sum_n {}_2b^n \text{PSF}({}_2x_k^n, {}_2y_k^n, {}_2z_k^n) \right) \quad (\text{S103})$$

407 where pre-scripts 1 and 2 are used to distinguish the two species. A graphical summary is show on Fig. [S16](#). We use  
408 this formulation for the estimates shown on Figs. [S11](#) and [S12](#).

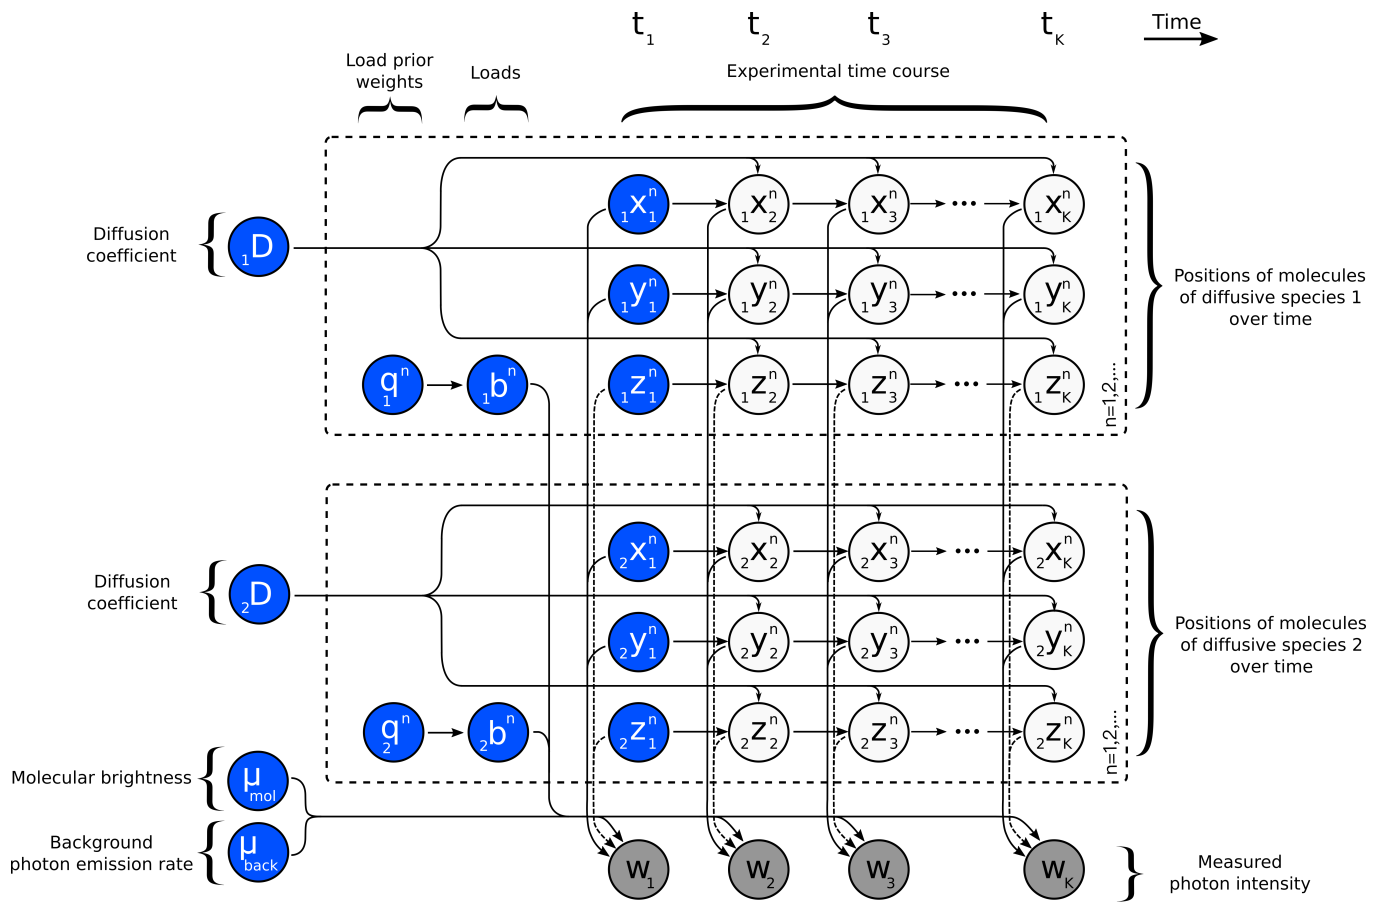

FIG. S16. **Graphical summary of the framework capturing two independent diffusion coefficients.** A multi-species population of model molecules, labeled by  $n = 1, 2, \dots$ , evolves during the measurement period which is marked by  $k = 1, 2, \dots, K$ . Here,  ${}_1x_k^n$ ,  ${}_1y_k^n$  and  ${}_1z_k^n$  denote the location of molecule  $n$  at time  $t_k$  of species 1,  ${}_2x_k^n$ ,  ${}_2y_k^n$  and  ${}_2z_k^n$  denote the location of molecule  $n$  at time  $t_k$  of species 2,  $\mu_{mol}$  and  $\mu_{back}$  denote molecular brightness and background photon emission rates. The diffusion coefficient  ${}_1D$  and  ${}_2D$  determine the evolution of the molecule locations of species 1 and 2 which, in turn, determine the instantaneous photon emission rates and ultimately the recorded photon intensities  $w_k$ . Load variables  ${}_1b^n$  and  ${}_2b^n$ , with prior weights  ${}_1q^n$  and  ${}_2q^n$ , respectively, are introduced to model molecule populations of the two species of *a priori* unknown sizes. Following common machine learning convention, the measurements  $w_k$  are dark shaded. Additionally, model variables requiring prior probability distributions are highlighted in blue.

409 **S6. Summary of notation, abbreviations, parameters and other options**

TABLE S3. Summary of notation.

| Description                                                          | Variable               | Units                    |
|----------------------------------------------------------------------|------------------------|--------------------------|
| Diffusion coefficient                                                | $D$                    | $\mu\text{m}^2/\text{s}$ |
| $\alpha$ parameter of the diffusion coefficient prior                | $\alpha_D$             | -                        |
| $\beta$ parameter of the diffusion coefficient prior                 | $\beta_D$              | $\mu\text{m}^2/\text{s}$ |
| Total time trace duration                                            | $T_{total}$            | s                        |
| Molecular brightness at the center of the confocal volume            | $\mu_{mol}$            | photons/s                |
| $\alpha$ parameter of the molecular brightness's prior               | $\alpha_{mol}$         | -                        |
| $\beta$ parameter of the molecular brightness's prior                | $\beta_{mol}$          | photons/s                |
| Proposal parameter of the molecule photon emission rate              | $\alpha_{mol}^{prop}$  | -                        |
| Emission rate of molecule $n$ at time $t_k$                          | $\mu_k^n$              | photons/s                |
| Combined photon emission rates of all molecules at time $t_k$        | $\mu_k$                | photons/s                |
| Background photon emission rate                                      | $\mu_{back}$           | photons/s                |
| $\alpha$ parameter of the background photon emission rate's prior    | $\alpha_{back}$        | -                        |
| $\beta$ parameter of the background photon emission rate's prior     | $\beta_{back}$         | photons/s                |
| Proposal parameter of the background photon emission rate            | $\alpha_{back}^{prop}$ | -                        |
| Minor semi-axis of confocal PSF (focal plane)                        | $\omega_{xy}$          | $\mu\text{m}$            |
| Major semi-axis of confocal 3DG PSF (optical axis)                   | $\omega_z$             | $\mu\text{m}$            |
| Major semi-axis of confocal 2DG-L PSF (optical axis)                 | $z_R$                  | $\mu\text{m}$            |
| Laser wavelength                                                     | $\lambda_{exc}$        | $\mu\text{m}$            |
| Numerical aperture                                                   | NA                     | -                        |
| Solution refractive index                                            | $n_{sol}$              | -                        |
| Location of sigma points                                             | $x^{sn}$               | $\mu\text{m}$            |
| Location of molecule $n$ at time $t_k$ in $x$ -coordinate            | $x_k^n$                | $\mu\text{m}$            |
| Location of molecule $n$ at time $t_k$ in $y$ -coordinate            | $y_k^n$                | $\mu\text{m}$            |
| Location of molecule $n$ at time $t_k$ in $z$ -coordinate            | $z_k^n$                | $\mu\text{m}$            |
| Recorded photon intensity at time $t_k$                              | $w_k$                  | photons                  |
| Load variable for molecule $n$                                       | $b^n$                  | -                        |
| Prior weight for $b_n$                                               | $q^n$                  | -                        |
| $\alpha$ parameter of prior weight $q^n$                             | $\alpha_q$             | -                        |
| $\beta$ parameter of prior weight $q^n$                              | $\beta_q$              | -                        |
| Upper bound for the number of model molecules                        | $N$                    | -                        |
| Mean value of initial molecule position's prior in the $xy$ -plane   | $\mu_{xy}$             | $\mu\text{m}$            |
| Mean value of initial molecule position's prior on the $z$ -axis     | $\mu_z$                | $\mu\text{m}$            |
| Variance of the initial molecule position's prior in the $xy$ -plane | $\sigma_{xy}$          | $\mu\text{m}$            |
| Variance of the initial molecule position's prior on the $z$ -axis   | $\sigma_z$             | $\mu\text{m}$            |
| Normalized distance of molecule $n$ at time $t_k$                    | $d_k^n$                | -                        |
| Normalized distance for the definition of effective volume           | $\ell$                 | -                        |
| Effective volume                                                     | $V_\ell$               | $\mu\text{m}^3$          |
| Heaviside function                                                   | $H$                    | -                        |
| Periodic boundary in the $xy$ -plane (focal plane)                   | $L_{xy}$               | $\mu\text{m}$            |
| Periodic boundary on the $z$ -axis (optical axis)                    | $L_z$                  | $\mu\text{m}$            |
| Convergence threshold                                                | $\epsilon_{thr}$       | $\mu\text{m}^2/\text{s}$ |
| Bin threshold                                                        | $\epsilon_{bin}$       | photons                  |

TABLE S4. List of abbreviations.

| Phrase                                | Abbreviation |
|---------------------------------------|--------------|
| Fluorescence correlation spectroscopy | FCS          |
| Point spread function                 | PSF          |
| Three dimensional Gaussian            | 3DG          |
| Two dimensional Gaussian-Lorentzian   | 2DGL         |
| Two dimensional Gaussian-Cylindrical  | 2DGC         |
| Forward filtering backward sampling   | FFBS         |
| Markov chain Monte Carlo              | MCMC         |
| Graphical user interface              | GUI          |
| Excitation profile                    | EXC          |
| Collection efficiency function        | CEF          |

TABLE S5. Probability distributions used and their densities. Here, the corresponding random variables are denoted by  $x$ .

| Distribution     | Notation                           | Probability density function                                                                                                                          | Mean value                    | Variance/Covariance                                    |
|------------------|------------------------------------|-------------------------------------------------------------------------------------------------------------------------------------------------------|-------------------------------|--------------------------------------------------------|
| Normal           | <b>Normal</b> $(\mu, \sigma^2)$    | $\frac{1}{\sqrt{2\pi\sigma^2}} e^{-\frac{(x-\mu)^2}{2\sigma^2}}$                                                                                      | $\mu$                         | $\sigma^2$                                             |
| Symmetric Normal | <b>SymNormal</b> $(\mu, \sigma^2)$ | $\frac{1}{2} \frac{e^{-\frac{(x+\mu)^2}{2\sigma^2}}}{\sqrt{2\pi\sigma^2}} + \frac{1}{2} \frac{e^{-\frac{(x-\mu)^2}{2\sigma^2}}}{\sqrt{2\pi\sigma^2}}$ | 0                             | $\mu^2 + \sigma^2$                                     |
| Bivariate Normal | <b>BNormal</b> $(\mu, \Sigma)$     | $\frac{1}{2\pi\sqrt{ \Sigma }} e^{-\frac{1}{2}(x-\mu)^T \Sigma^{-1}(x-\mu)}$                                                                          | $\mu$                         | $\Sigma$                                               |
| Poisson          | <b>Poisson</b> $(\lambda)$         | $\frac{\lambda^x e^{-\lambda}}{x!}$                                                                                                                   | $\lambda$                     | $\lambda$                                              |
| Gamma            | <b>Gamma</b> $(\alpha, \beta)$     | $\frac{1}{\Gamma(\alpha)\beta^\alpha} x^{\alpha-1} e^{-\frac{x}{\beta}}$                                                                              | $\alpha\beta$                 | $\alpha\beta^2$                                        |
| Inverse Gamma    | <b>InvGamma</b> $(\alpha, \beta)$  | $\frac{\beta^\alpha}{\Gamma(\alpha)} x^{-\alpha-1} e^{-\frac{\beta}{x}}$                                                                              | $\frac{\beta}{\alpha-1}$      | $\frac{\beta^2}{(\alpha-1)^2(\alpha-2)}$               |
| Beta             | <b>Beta</b> $(\alpha, \beta)$      | $\frac{\Gamma(\alpha+\beta)}{\Gamma(\alpha)\Gamma(\beta)} x^{\alpha-1}(1-x)^{\beta-1}$                                                                | $\frac{\alpha}{\alpha+\beta}$ | $\frac{\alpha\beta}{(\alpha+\beta)^2(\alpha+\beta+1)}$ |
| Bernoulli        | <b>Bernoulli</b> $(q)$             | $(q-1)\delta_0(x) + q\delta_1(x)$                                                                                                                     | $q$                           | $q(1-q)$                                               |

TABLE S6. Parameter values used in the generation of the synthetic traces. Choices are listed according to figures.

| Units       | PSF  | $L_{xy}$<br>$\mu m$ | $L_z$<br>$\mu m$ | $\omega_{xy}$<br>$\mu m$ | $\omega_{z,zR}$<br>$\mu m$ | $N$<br>-                       | $D$<br>$\mu m^2/s$              | $\mu_{mol}$<br>photons/s    | $\mu_{back}$<br>photons/s | $T_{total}$<br>s | $\delta t$<br>s |
|-------------|------|---------------------|------------------|--------------------------|----------------------------|--------------------------------|---------------------------------|-----------------------------|---------------------------|------------------|-----------------|
| Fig. 1(a1)  | 3DG  | 2                   | 3                | 0.30                     | 1.50                       | 10                             | 10                              | $5 \times 10^4$             | $10^3$                    | 0.1              | $10^{-4}$       |
| Fig. 1(a2)  | 3DG  | 2                   | 3                | 0.30                     | 1.50                       | 100                            | 10                              | $5 \times 10^4$             | $10^3$                    | 0.1              | $10^{-4}$       |
| Fig. 2(a)   | 3DG  | 2,2,2,2,4           | 3,3,3,3,7        | 0.30                     | 1.50                       | $10^2, 10^2, 10^2, 10^2, 10^3$ | $10^{-2}, 10^{-1}, 1, 10, 10^2$ | $5 \times 10^4$             | $10^3$                    | 0.1              | $10^{-4}$       |
| Fig. 2(c)   | 3DG  | 2                   | 3                | 0.30                     | 1.50                       | 150                            | 10                              | $5 \times 10^4$             | $10^3$                    | 10               | $10^{-4}$       |
| Fig. 3(a)   | 3DG  | 2                   | 3                | 0.30                     | 1.50                       | 150                            | 1                               | $10^5, 5 \times 10^4, 10^4$ | $10^3$                    | 0.1              | $10^{-4}$       |
| Fig. S3     | 3DG  | 2                   | 3                | 0.30                     | 1.50                       | 50                             | 1                               | $5 \times 10^4$             | $10^3$                    | 0.1              | $10^{-4}$       |
| Fig. S4(a)  | 3DG  | 2                   | 3                | 0.30                     | 1.50                       | 50                             | 10                              | $5 \times 10^4$             | $10^3$                    | 100              | $10^{-4}$       |
| Fig. S5(a1) | 3DG  | 2                   | 3                | 0.30                     | 1.50                       | 50                             | 10                              | $5 \times 10^4$             | $10^3$                    | 0.1              | $10^{-4}$       |
| Fig. S5(a2) | 2DGL | 2                   | 3                | 0.30                     | 1.50                       | 50                             | 10                              | $5 \times 10^4$             | $10^3$                    | 0.1              | $10^{-4}$       |
| Fig. S5(a3) | 2DGC | 2                   | 3                | 0.30                     | -                          | 50                             | 10                              | $5 \times 10^4$             | $10^3$                    | 0.1              | $10^{-4}$       |
| Fig. S11(a) | 3DG  | 2                   | 3                | 0.30                     | 1.50                       | 20, 20                         | 1,10                            | $5 \times 10^4$             | $10^3$                    | 1                | $10^{-4}$       |



TABLE S7. Parameter values used in the analyses of the traces. Choices are listed according to figures.

| Units       | PSF  | $\omega_{xy}$<br>$\mu\text{m}$ | $\omega_z, z_R$<br>$\mu\text{m}$ | $N$<br>- | $\alpha_D$<br>- | $\beta_D$<br>$\mu\text{m}^2/\text{s}$ | $\alpha_{mol}$<br>- | $\beta_{mol}$<br>pht/s | $\alpha_{mol}^{prop}$<br>- | $\alpha_{back}$<br>- | $\beta_{back}$<br>pht/s | $\alpha_{back}^{prop}$<br>- | $\alpha_q$<br>- | $\beta_q$<br>- | $\mu_{xy}$<br>$\mu\text{m}$ | $\mu_z$<br>$\mu\text{m}$ | $\sigma_{xy}^2$<br>$\mu\text{m}^2$ | $\sigma_z^2$<br>$\mu\text{m}^2$ | $\epsilon_{thr}$<br>$\mu\text{m}^2/\text{s}$ | $\epsilon_{bin}$<br>pht |
|-------------|------|--------------------------------|----------------------------------|----------|-----------------|---------------------------------------|---------------------|------------------------|----------------------------|----------------------|-------------------------|-----------------------------|-----------------|----------------|-----------------------------|--------------------------|------------------------------------|---------------------------------|----------------------------------------------|-------------------------|
| Fig. 1(a1)  | 3DG  | 0.30                           | 1.50                             | 50       | 1               | 1                                     | 2                   | $10^4$                 | $10^3$                     | 2                    | 500                     | $10^3$                      | 1               | 1              | 0.2                         | 0.2                      | 2                                  | 2                               | 0.1                                          | 4                       |
| Fig. 1(a2)  | 3DG  | 0.30                           | 1.50                             | 50       | 1               | 1                                     | 2                   | $10^4$                 | $10^3$                     | 2                    | 500                     | $10^3$                      | 1               | 1              | 0.2                         | 0.2                      | 2                                  | 2                               | 0.1                                          | 4                       |
| Fig. 2(a)   | 3DG  | 0.30                           | 1.50                             | 50       | 1               | 1                                     | 2                   | $10^4$                 | $10^3$                     | 2                    | 500                     | $10^3$                      | 1               | 1              | 0.2                         | 0.2                      | 2                                  | 2                               | 0.1                                          | 4                       |
| Fig. 2(b)   | 3DG  | 0.30                           | 1.50                             | 50       | 1               | 1                                     | 2                   | $10^4$                 | $10^3$                     | 2                    | 500                     | $10^3$                      | 1               | 1              | 0.2                         | 0.2                      | 2                                  | 2                               | 0.1                                          | 4                       |
| Fig. 3      | 3DG  | 0.30                           | 1.50                             | 50       | 1               | 1                                     | 2                   | $10^4$                 | $10^3$                     | 2                    | 500                     | $10^3$                      | 1               | 1              | 0.2                         | 0.2                      | 2                                  | 2                               | 0.1                                          | 4                       |
| Fig. 4      | 2DGL | 0.40                           | -                                | 50       | 1               | 1                                     | 2                   | $10^4$                 | $10^3$                     | 2                    | 500                     | $10^3$                      | 1               | 1              | 0.2                         | 0.2                      | 2                                  | 2                               | 0.1                                          | 4                       |
| Fig. 5      | 3DG  | 0.27                           | 4.51                             | 50       | 1               | 1                                     | 2                   | $10^4$                 | $10^3$                     | 2                    | 500                     | $10^3$                      | 1               | 1              | 0.2                         | 0.2                      | 2                                  | 2                               | 0.1                                          | 4                       |
| Fig. 6      | 3DG  | 0.27                           | 4.51                             | 50       | 1               | 1                                     | 2                   | $10^4$                 | $10^3$                     | 2                    | 500                     | $10^3$                      | 1               | 1              | 0.2                         | 0.2                      | 2                                  | 2                               | 0.1                                          | 4                       |
| Fig. 7(a1)  | 3DG  | 0.27                           | 4.51                             | 50       | 1               | 1                                     | 2                   | $10^4$                 | $10^3$                     | 2                    | 500                     | $10^3$                      | 1               | 1              | 0.2                         | 0.2                      | 2                                  | 2                               | 0.1                                          | 4                       |
| Fig. 7(a2)  | 3DG  | 0.27                           | 4.51                             | 50       | 1               | 1                                     | 2                   | $10^4$                 | $10^3$                     | 2                    | 500                     | $10^3$                      | 1               | 1              | 0.2                         | 0.2                      | 2                                  | 2                               | 0.1                                          | 4                       |
| Fig. 7(a3)  | 3DG  | 0.27                           | 4.51                             | 50       | 1               | 1                                     | 2                   | $10^4$                 | $10^3$                     | 2                    | 500                     | $10^3$                      | 1               | 1              | 0.2                         | 0.2                      | 2                                  | 2                               | 0.1                                          | 4                       |
| Fig. S3     | 3DG  | 0.30                           | 1.50                             | 50       | 1               | 1                                     | 2                   | $10^4$                 | $10^3$                     | 2                    | 500                     | $10^3$                      | 1               | 1              | 0.2                         | 0.2                      | 2                                  | 2                               | 0.1                                          | 4                       |
| Fig. S4     | 3DG  | 0.23                           | 0.55                             | 50       | 1               | 1                                     | 2                   | $10^4$                 | $10^3$                     | 2                    | 500                     | $10^3$                      | 1               | 1              | 0.2                         | 0.2                      | 2                                  | 2                               | 0.1                                          | 4                       |
| Fig. S5(b1) | 3DG  | 0.27                           | 4.51                             | 50       | 1               | 1                                     | 2                   | $10^4$                 | $10^3$                     | 2                    | 500                     | $10^3$                      | 1               | 1              | 0.2                         | 0.2                      | 2                                  | 2                               | 0.1                                          | 4                       |
| Fig. S5(b2) | 2DGL | 0.27                           | 4.51                             | 50       | 1               | 1                                     | 2                   | $10^4$                 | $10^3$                     | 2                    | 500                     | $10^3$                      | 1               | 1              | 0.2                         | 0.2                      | 2                                  | 2                               | 0.1                                          | 4                       |
| Fig. S5(b3) | 2DGC | 0.27                           | -                                | 50       | 1               | 1                                     | 2                   | $10^4$                 | $10^3$                     | 2                    | 500                     | $10^3$                      | 1               | 1              | 0.2                         | 0.2                      | 2                                  | 2                               | 0.1                                          | 4                       |
| Fig. S8     | 3DG  | 0.27                           | 4.51                             | 50       | 1               | 1                                     | 2                   | $10^4$                 | $10^3$                     | 2                    | 500                     | $10^3$                      | 1               | 1              | 0.2                         | 0.2                      | 2                                  | 2                               | 0.1                                          | 4                       |
| Fig. S9     | 3DG  | 0.27                           | 4.51                             | 50       | 1               | 1                                     | 2                   | $10^4$                 | $10^3$                     | 2                    | 500                     | $10^3$                      | 1               | 1              | 0.2                         | 0.2                      | 2                                  | 2                               | 0.1                                          | 4                       |
| Fig. S10    | 2DGL | 0.42                           | -                                | 50       | 1               | 1                                     | 2                   | $10^4$                 | $10^3$                     | 2                    | 500                     | $10^3$                      | 1               | 1              | 0.2                         | 0.2                      | 2                                  | 2                               | 0.1                                          | 4                       |
| Fig. S11    | 3DG  | 0.3                            | 1.5                              | 50       | 1               | 1                                     | 2                   | $10^4$                 | $10^3$                     | 2                    | 500                     | $10^3$                      | 1               | 1              | 0.2                         | 0.2                      | 2                                  | 2                               | 0.1                                          | 4                       |

- 410 [1] H. C. Berg, *Random walks in biology* (Princeton University Press, 1993).
- 411 [2] T. Hida, in *Brownian Motion* (Springer, 1980) pp. 44–113.
- 412 [3] A. Einstein, *Annalen der physik* **322**, 549 (1905).
- 413 [4] H. S. Muddana, S. Sengupta, A. Sen, and P. J. Butler, arXiv preprint arXiv:1410.0844 (2014).
- 414 [5] N.-S. Cheng, *Industrial & engineering chemistry research* **47**, 3285 (2008).
- 415 [6] L. Cohen, in *Advanced Signal Processing Algorithms, Architectures, and Implementations III*, Vol. 1770 (International Society for Optics and Photonics, 1992) pp. 378–394.
- 416 [7] J. Widengren, U. Mets, and R. Rigler, *The Journal of Physical Chemistry* **99**, 13368 (1995).
- 417 [8] J. Enderlein, I. Gregor, D. Patra, and J. Fitter, *Journal of fluorescence* **15**, 415 (2005).
- 418 [9] R. Rigler and E. S. Elson, *Fluorescence correlation spectroscopy: theory and applications*, Vol. 65 (Springer Science & Business Media, 2012).
- 419 [10] S.-M. Guo, J. He, N. Monnier, G. Sun, T. Wohland, and M. Bathe, *Analytical chemistry* **84**, 3880 (2012).
- 420 [11] J. Enderlein and W. P. Ambrose, *Applied optics* **36**, 5298 (1997).
- 421 [12] Y. Chen, J. D. Müller, Q. Ruan, and E. Gratton, *Biophysical journal* **82**, 133 (2002).
- 422 [13] T. Wilson *et al.*, *Confocal microscopy*, Vol. 426 (Academic press London, 1990).
- 423 [14] J. Pawley, *Handbook of biological confocal microscopy* (Springer Science & Business Media, 2010).
- 424 [15] P. Schwillle, *Cell biochemistry and biophysics* **34**, 383 (2001).
- 425 [16] E. Wolf, in *Proceedings of the Royal Society of London A: Mathematical, Physical and Engineering Sciences*, Vol. 253 (The Royal Society, 1959) pp. 349–357.
- 426 [17] B. Richards and E. Wolf, in *Proceedings of the Royal Society of London A: Mathematical, Physical and Engineering Sciences*, Vol. 253 (The Royal Society, 1959) pp. 358–379.
- 427 [18] R. Rigler, Ü. Mets, J. Widengren, and P. Kask, *European Biophysics Journal* **22**, 169 (1993).
- 428 [19] B. Zhang, J. Zerubia, and J.-C. Olivo-Marin, *Applied Optics* **46**, 1819 (2007).
- 429 [20] K. M. Berland, P. So, and E. Gratton, *Biophysical Journal* **68**, 694 (1995).
- 430 [21] T. Dertinger, V. Pacheco, I. von der Hocht, R. Hartmann, I. Gregor, and J. Enderlein, *ChemPhysChem* **8**, 433 (2007).
- 431 [22] A. E. Siegman, “Lasers (mill valley, ca,)” (1986).
- 432 [23] H. Blom and G. Björk, *Applied optics* **48**, 6050 (2009).

- 437 [24] M. Born and E. Wolf, *Principles of optics: electromagnetic theory of propagation, interference and diffraction of light*  
438 (Elsevier, 2013).
- 439 [25] S. F. Gibson and F. Lanni, *JOSA A* **9**, 154 (1992).
- 440 [26] V. Buschmann, B. Krämer, F. Koberling, R. Macdonald, and S. Rättinger, Application Note PicoQuant GmbH, Berlin  
441 (2009).
- 442 [27] S. Jazani, I. Sgouralis, and S. Pressé, *The Journal of Chemical Physics* (2019 (to appear)).
- 443 [28] F. J. Anscombe, *Biometrika* **35**, 246 (1948).
- 444 [29] J. Paisley and M. I. Jordan, arXiv preprint arXiv:1604.00685 (2016).
- 445 [30] T. Broderick, M. I. Jordan, J. Pitman, *et al.*, *Bayesian analysis* **7**, 439 (2012).
- 446 [31] J. Paisley and L. Carin, in *Proceedings of the 26th Annual International Conference on Machine Learning (ACM, 2009)*  
447 pp. 777–784.
- 448 [32] L. Al Labadi and M. Zarepour, *Sankhya A* , 1.
- 449 [33] C. Robert and G. Casella, *Introducing Monte Carlo Methods with R* (Springer Science & Business Media, 2009).
- 450 [34] A. Gelman, J. B. Carlin, H. S. Stern, D. B. Dunson, A. Vehtari, and D. B. Rubin, *Bayesian data analysis*, Vol. 2 (CRC  
451 press Boca Raton, FL, 2014).
- 452 [35] U. Von Toussaint, *Reviews of Modern Physics* **83**, 943 (2011).
- 453 [36] H. Liu and H. Motoda, *Computational methods of feature selection* (CRC Press, 2007).
- 454 [37] M. Tavakoli, J. N. Taylor, C.-B. Li, T. Komatsuzaki, and S. Pressé, “Single molecule data analysis: An introduction,” in  
455 *Advances in Chemical Physics* (John Wiley & Sons, 2017) Chap. 4, pp. 205–305.
- 456 [38] I. Sgouralis and S. Pressé, *Biophysical Journal* **112**, 2021 (2017).
- 457 [39] O. Cappé, E. Moulines, and T. Rydén, in *Proceedings of EUSFLAT Conference* (Springer, 2009) pp. 14–16.
- 458 [40] T. Rydén *et al.*, *Bayesian Analysis* **3**, 659 (2008).
- 459 [41] L. Rabiner and B. Juang, *iee assp magazine* **3**, 4 (1986).
- 460 [42] C. M. Bishop, *Pattern recognition and machine learning* (springer, 2006).
- 461 [43] L. R. Rabiner, *Proceedings of the IEEE* **77**, 257 (1989).
- 462 [44] S. L. Scott, *Journal of the American Statistical Association* **97**, 337 (2002).
- 463 [45] M. Y. Byron, K. V. Shenoy, and M. Sahani, Technical report, Department of Electrical Engineering, Stanford University  
464 **19**, 25 (2004).
- 465 [46] E. A. Wan and R. Van Der Merwe, in *Adaptive Systems for Signal Processing, Communications, and Control Symposium*  
466 *2000. AS-SPCC. The IEEE 2000* (Ieee, 2000) pp. 153–158.
- 467 [47] H. M. Menegaz, J. Y. Ishihara, G. A. Borges, and A. N. Vargas, *IEEE Transactions on automatic control* **60**, 2583 (2015).
- 468 [48] J. Stoer and R. Bulirsch, *Introduction to numerical analysis*, Vol. 12 (Springer Science & Business Media, 2013).
- 469 [49] R. E. Kalman, *Journal of Basic Engineering* **82**, 35 (1960).
- 470 [50] R. E. Kalman and R. S. Bucy, *Journal of Basic Engineering* **83**, 95 (1961).
- 471 [51] H. W. Sorenson, in *Advances in Control Systems*, Vol. 3 (Elsevier, 1966) pp. 219–292.
- 472 [52] R. Frühwirth, *Nuclear Instruments and Methods in Physics Research Section A: Accelerators, Spectrometers, Detectors*  
473 *and Associated Equipment* **262**, 444 (1987).
- 474 [53] L. Ljung, *IEEE Transactions on Automatic Control* **24**, 36 (1979).
- 475 [54] T. Song and J. Speyer, *IEEE Transactions on Automatic Control* **30**, 940 (1985).
- 476 [55] M. Hoshiya and E. Saito, *Journal of engineering mechanics* **110**, 1757 (1984).
- 477 [56] J. Štecha and V. Havlena, in *Information Fusion (FUSION), 2012 15th International Conference on* (IEEE, 2012) pp.  
478 495–502.
- 479 [57] S. Sarkka, *IEEE Transactions on automatic control* **52**, 1631 (2007).
- 480 [58] S. J. Julier and J. K. Uhlmann, in *Signal Processing, sensor fusion, and target recognition VI*, Vol. 3068 (International  
481 Society for Optics and Photonics, 1997) pp. 182–194.
- 482 [59] F. Heiss and V. Wünschel, *journal of Econometrics* **144**, 62 (2008).
